# Supplementary material for: Cata‐Annulated Azaacene Bisimides
Source: PubMed Central journal article supplement (PMC8457205; doi:10.1002/chem.202101573), 2021-07-29
Supplement: CHEM-27-12284-s001.pdf [file CHEM-27-12284-s001.pdf]

# Chemistry–A European Journal

Supporting Information

## ***Cata*-Annulated Azaacene Bisimides**

Maximilian Elter, Lukas Ahrens, Stella M. Luo, Frank Rominger, Jan Freudenberg,\*  
Dennis D. Cao,\* and Uwe H. F. Bunz\*

**Table of Contents**

|                                         |     |
|-----------------------------------------|-----|
| 1) General Remarks.....                 | S2  |
| 2) Synthesis .....                      | S3  |
| 3) Cyclic Voltammetry .....             | S11 |
| 4) Optical Spectroscopy .....           | S12 |
| 5) Geometry and Energy computation..... | S14 |
| 6) FMO Distribution.....                | S26 |
| 7) NICS(1)zz calculations.....          | S27 |
| 8) AICD Calculations.....               | S28 |
| 9) NMR Spectroscopy .....               | S31 |
| 10) Infrared Spectroscopy .....         | S55 |
| 11) HRMS Spectra .....                  | S59 |
| 12) Crystallographic Data.....          | S65 |
| 13) References .....                    | S67 |

## 1) General Remarks

TLC was performed using polyester sheets coated with silica gel produced by Macherey-Nagel & Co. Polygram® SIL g/UV254). Column chromatography was performed using silica gel from Macherey, Nagel & Co. (particle size: 0.032–0.062 mm). Preparative GPC was performed on Bio-Beads® (S-X1 Beads, 200-400 Mesh, crosslinked polystyrene), purchased from Bio-Rad Laboratories, Inc.. CHROMAFIL® Xtra PTFE-45/25 syringe filters by Macherey-Nagel with a pore size of 0.45 µm and 25 mm diameter were used as syringe filters. IR spectra were recorded at room temperature on a Jasco FT/IR-4100 spectrometer. Melting points were determined in open glass capillaries on a Melting Point Apparatus *MEL-TEMP* (Electrothermal, Rochford, UK) and are uncorrected. NMR spectra were recorded on Bruker Avance spectrometers using the specified frequency at 295 K. Chemical shifts ( $\delta$ ) are given in parts per million (ppm) relative to internal solvent signals.<sup>[S1]</sup> The following abbreviations describe the signal multiplicities: s = singlet, d = doublet, t = triplet, quin = quintet, dd = doublet of doublets, m = multiplet, br = broad signal. High-resolution mass spectra (HRMS) were obtained by matrix-assisted laser desorption/ionization (MALDI) using *trans*-2-[3-(4-*tert*-butylphenyl)-2-methyl-2-propenylidene]-malononitrile (DCTB) as matrix, electrospray ionisation (ESI) or direct analysis in real time (DART) experiments. CV measurements were performed on a VersaSTAT 3 potentiostat by Princeton Applied Research. UV-vis spectra were recorded on a Jasco V670. Computational studies were carried out using DFT calculations on Gaussian16 and GaussView 6. Geometry optimizations were performed using the B3LYP functional and def2SVP basis set. At this geometry, the absolute energy and FMO energies were determined by a single-point approach at the B3LYP/def2TZVP level.<sup>[S2]</sup>

The diamine-building blocks used were synthesized according to literature procedures:

- 4,5-Dichloro-2,7-dihexylpyrrolo[3,4-*e*]isoindole-1,3,6,8(2*H*,7*H*)-tetraone<sup>[S3]</sup>
- 3,6-Bis((triisopropylsilyl)ethynyl)benzene-1,2-diamine,<sup>[S4]</sup>
- 1,4-bis((triisopropylsilyl)ethynyl)naphthalene-2,3-diamine,<sup>[S5]</sup>
- 1,4-bis((triisopropylsilyl)ethynyl)anthracene-2,3-diamine,<sup>[S6]</sup>
- 1,4-bis((triisopropylsilyl)ethynyl)phenazine-2,3-diamine,<sup>[S7]</sup>
- 4,7-bis((triisopropylsilyl)ethynyl)-benzo[*c*][1,2,5]thiadiazole-5,6-diamine,<sup>[S8]</sup>
- 9,10-bis((triisopropylsilyl)ethynyl)-anthracene-2,3,6,7-tetraaminiumchloride.<sup>[S9]</sup>

## 2) Synthesis

### General Procedure (GP)

The corresponding *ortho*-diamine (1.00 eq), **MDI-Cl<sub>2</sub>** (1.00 eq), cesium carbonate (3.00 eq.) and Pd RuPhos G1 (5 mol%) were placed in a dry Schlenk tube under Argon atmosphere. Then dry and degassed toluene (1 mL per 50 mg diamine) was added and the reaction was stirred at 120 °C for 16 h. The reaction mixture was diluted with dichloromethane and water was added. The phases were separated and the aqueous layer was extracted with methylene chloride (3x10 mL). The combined organic layers were dried over MgSO<sub>4</sub>, filtered through filter paper and the solvent was removed under reduced pressure.

### 2,5-Dihexyl-8,11-bis((triisopropylsilyl)ethynyl)-7,12-dihydrodipyrrolo[3,4-*a*:3',4'-*c*]phenazine-1,3,4,6(2*H*,5*H*)-tetraone (1-**H<sub>2</sub>**)

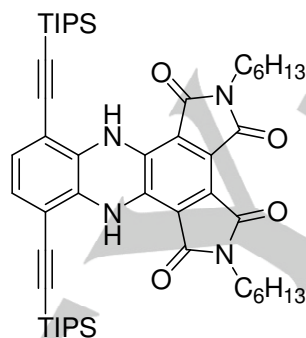

**GP** was applied to 3,6-bis((triisopropylsilyl)ethynyl)benzene-1,2-diamine **6** (51.7 mg, 110 μmol, 1.00 eq.) and **MDI-Cl<sub>2</sub>** (50.0 mg, 110 μmol, 1.00 eq.), using cesium carbonate (108 mg, 331 μmol, 3.00 eq.) and Pd-RuPhos (G1) (4.50 mg, 5.51 μmol, 5 mol%). The resulting crude product was purified by column chromatography (SiO<sub>2</sub>, PE/DCM 1:1) yielding **1-H<sub>2</sub>** as a red solid (40.2 mg, 47.3 μmol, 43%). *R<sub>f</sub>* (DCM:PE) = 0.27, <sup>1</sup>H NMR (400 MHz, CDCl<sub>3</sub>) δ = 8.49 (s, 2H), 6.69 (s, 2H), 3.59 (t, *J* = 7.0 Hz, 4H), 1.62 (quin, *J* = 6.6 Hz, 4H), 1.32 - 1.11 (m, 58H), 0.92 - 0.83 (m, 7H). <sup>13</sup>C NMR (101 MHz, CDCl<sub>3</sub>) δ = 167.8, 163.9, 136.6, 131.0, 126.4, 120.8, 110.0, 109.0, 101.9, 99.4, 38.2, 31.5, 28.3, 26.5, 22.6, 18.8, 14.2, 11.4. HRMS (MALDI<sup>+</sup>, DCTB): *m/z* calcd. for C<sub>50</sub>H<sub>72</sub>N<sub>4</sub>O<sub>4</sub>Si<sub>2</sub>: [M]<sup>+</sup> 848.5092, found: 848.5085, correct isotope distribution. IR (ATR)  $\tilde{\nu}$  [cm<sup>-1</sup>] = 3320, 2927, 2859, 2363, 1759, 1691, 1540, 1380, 802, 776, 675, 660, 619, 609, 595, 442, 410. M.p. = 180 °C.

## COMMUNICATION

**2,5-Dihexyl-8,11-bis((triisopropylsilyl)ethynyl)dipyrrolo[3,4-*a*:3',4'-*c*]phenazine-1,3,4,6(2*H*,5*H*)-tetraone (1a)**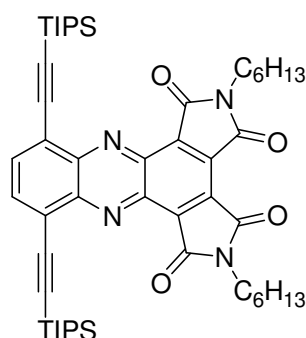

**1-H<sub>2</sub>** (30.0 mg, 35.3  $\mu\text{g}$ , 1.00 eq.) was dissolved in methylene chloride and an excess of manganese dioxide (>100 eq.) was added. The reaction mixture was stirred at room temperature until TLC showed full consumption of the dihydro species. The mixture was filtered through a filter paper and the solvent was removed under reduced pressure to yield **1a** as a red solid (28.1 mg, 33.2  $\mu\text{mol}$ , 94%). <sup>1</sup>H NMR (600 MHz, CDCl<sub>3</sub>)  $\delta$  = 8.14 (s, 2H), 3.83 (t, *J* = 7.2 Hz, 4H), 1.79 - 1.72 (m, 4H), 1.35 - 1.24 (m, 54H), 0.90 - 0.87 (m, 6H). <sup>13</sup>C NMR (151 MHz, CDCl<sub>3</sub>)  $\delta$  = 164.6, 164.5, 145.2, 139.7, 137.9, 134.4, 130.2, 125.6, 103.6, 102.0, 38.7, 31.3, 28.3, 26.4, 22.4, 18.8, 14.1, 11.5. HRMS (MALDI+, DCTB): *m/z* calcd. for C<sub>50</sub>H<sub>71</sub>N<sub>4</sub>O<sub>4</sub>Si<sub>2</sub>: [M+H]<sup>+</sup> 847.5008, found: 847.5038, correct isotope distribution. IR (ATR)  $\tilde{\nu}$  [cm<sup>-1</sup>] = 2923, 2864, 1771, 1722, 1713, 1463, 1398, 1364, 1064, 996, 881, 791, 676, 659, 589, 462, 456, 418. M.p. = 174 °C.

**2,5-Dihexyl-8,13-bis((triisopropylsilyl)ethynyl)-7,14-dihydrobenzo[*l*]dipyrrolo[3,4-*a*:3',4'-*c*]phenazine-1,3,4,6(2*H*,5*H*)-tetraone (2-H<sub>2</sub>)**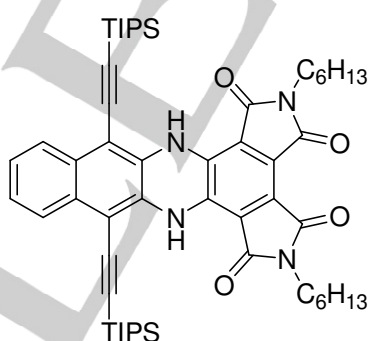

**GP** was applied to 1,4-bis((triisopropylsilyl)ethynyl)naphthalene-2,3-diamine **7** (57.2 mg, 110  $\mu\text{mol}$ , 1.00 eq.) and **MDI-Cl<sub>2</sub>** (50.0 mg, 110  $\mu\text{mol}$ , 1.00 eq.), using cesium carbonate (108 mg, 331  $\mu\text{mol}$ , 3.00 eq.) and PdRuPhos (G1) (4.50 mg, 5.51  $\mu\text{mol}$ , 5 mol%). The resulting crude product was purified by column chromatography (SiO<sub>2</sub>, PE/DCM 1:1) yielding **2-H<sub>2</sub>** as a red solid (78.0 mg, 86.7  $\mu\text{mol}$ , 79%). *R<sub>f</sub>* (DCM:PE) = 0.33, <sup>1</sup>H NMR (600 MHz, CDCl<sub>3</sub>)  $\delta$  = 9.02 (s, 2H), 7.96 - 7.93 (m, 2H), 7.38 - 7.33 (m, 2H), 3.63 (t, *J* = 7.0 Hz, 4H), 1.65 (br t, *J* = 6.9 Hz, 4H), 1.38 - 1.19 (m, 54H), 0.93 - 0.82 (m, 6H). <sup>13</sup>C NMR (151 MHz, CDCl<sub>3</sub>)  $\delta$  = 167.9, 164.1, 134.6, 131.1, 126.8, 125.6, 120.4, 111.3, 107.1, 103.8, 98.0, 83.4, 38.2, 31.5, 28.3, 26.6, 22.6, 19.0, 14.2, 11.4. HRMS (MALDI+, DCTB): *m/z* calcd. for C<sub>54</sub>H<sub>74</sub>N<sub>4</sub>O<sub>4</sub>Si<sub>2</sub>: [M]<sup>+</sup> 898.5249, found: 898.5254, correct isotope distribution. IR (ATR)  $\tilde{\nu}$  [cm<sup>-1</sup>] = 3310, 2921, 2861, 2359, 2359, 1698, 1540, 1508, 1456, 1380, 1352, 756, 670, 508, 410. Melting point: M.p. = 238 °C.

**2,5-Dihexyl-8,13-bis((triisopropylsilyl)ethynyl)benzo[*l*]dipyrrolo[3,4-*a*:3',4'-*c*]phenazine-1,3,4,6(2*H*,5*H*)-tetraone (2a)**

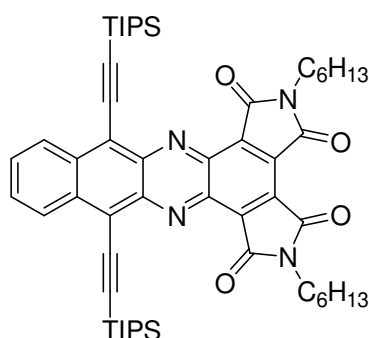

**2-H<sub>2</sub>** (40.0 mg, 44.5 μmol, 1.00 eq) was dissolved in methylene chloride and an excess of manganese dioxide (>100 eq.) was added. The reaction mixture was stirred at room temperature until TLC showed full consumption of the dihydro species. The mixture was filtered through a paper filter and the solvent was removed under reduced pressure to yield **2a** as a green solid (38.8 mg, 43.2 μmol, 97%). <sup>1</sup>H NMR (600 MHz, CDCl<sub>3</sub>) δ = 8.86 - 8.81 (m, 2H), 7.78 - 7.70 (m, 2H), 3.85 (t, *J* = 7.2 Hz, 4H), 1.78 (quin, *J* = 7.3 Hz, 4H), 1.33 (d, *J* = 7.2 Hz, 54H), 0.89 (t, *J* = 7.0 Hz, 6H). <sup>13</sup>C NMR (151 MHz, CDCl<sub>3</sub>) δ = 164.9, 164.8, 142.1, 140.0, 138.0, 134.8, 130.4, 129.9, 128.3, 122.8, 111.9, 101.8, 38.8, 31.5, 28.4, 26.6, 22.6, 19.1, 14.2, 11.8. HRMS (MALDI+, DCTB): *m/z* calcd. for C<sub>54</sub>H<sub>73</sub>N<sub>4</sub>O<sub>4</sub>Si<sub>2</sub>: [M+H]<sup>+</sup> 897.5179, found: 897.5165, correct isotope distribution. IR (ATR)  $\tilde{\nu}$  [cm<sup>-1</sup>] = 2940, 2923, 2863, 1771, 1721, 1713, 1435, 1394, 1101, 995, 880, 761, 735, 673, 659, 576, 444, 414, 402. Melting point: M.p. = 209 °C.

**2,5-Dihexyl-8,15-bis((triisopropylsilyl)ethynyl)-7,16-dihydronaphtho[2,3-*l*]dipyrrolo[3,4-*a*:3',4'-*c*]phenazine-1,3,4,6(2*H*,5*H*)-tetraone (3-H<sub>2</sub>)**

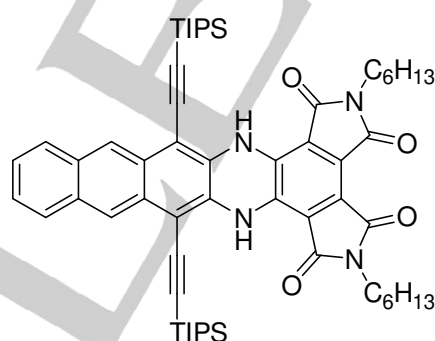

**GP** was applied to 1,4-bis((triisopropylsilyl)ethynyl)anthracene-2,3-diamine **8** (62.8 mg, 110 μmol, 1.00 eq.) and **MDI-Cl<sub>2</sub>** (50.0 mg, 110 μmol, 1.00 eq), using cesium carbonate (108 mg, 331 μmol, 3.00 eq.) and PdRuPhos (G1) (4.50 mg, 5.51 μmol, 5 mol%). The resulting crude product was purified by column chromatography (SiO<sub>2</sub>, PE/DCM 1:1) yielding **3-H<sub>2</sub>** as a dark-red solid (61.4 mg, 64.7 μmol, 59%). *R<sub>f</sub>* (DCM:PE) = 0.33, <sup>1</sup>H NMR (600 MHz, CDCl<sub>3</sub>) δ = 9.29 - 9.24 (m, 2H), 8.52 - 8.48 (m, 2H), 7.86 - 7.82 (m, 2H), 7.45 - 7.42 (m, 2H), 3.68 - 3.65 (m, 4H), 1.70 - 1.65 (m, 4H), 1.43 - 1.36 (m, 6H), 1.33 - 1.27 (m, 48H), 0.91 - 0.88 (m, 6H). <sup>13</sup>C NMR (151 MHz, CDCl<sub>3</sub>) δ = 167.9, 164.0, 133.3, 132.2, 131.0, 128.4, 128.0, 126.0, 124.2, 120.1, 111.9, 107.4, 102.3, 98.2, 38.1, 31.3, 28.1, 26.4, 22.4, 18.9, 14.0, 11.3. HRMS (MALDI+, DCTB): *m/z* calcd. for C<sub>58</sub>H<sub>76</sub>N<sub>4</sub>O<sub>4</sub>Si<sub>2</sub>: [M]<sup>+</sup> 948.5405, found: 948.5400, correct isotope distribution. IR

## COMMUNICATION

(ATR)  $\tilde{\nu}$  [cm<sup>-1</sup>] = 3314, 2938, 2890, 2861, 2359, 2341, 2138, 1766, 1697, 1577, 1525, 1489, 1455, 1400, 1375, 1361, 1346, 1112, 994, 879, 742, 673, 638, 620, 576, 468. M.p. = 269 °C.

**2,5-Dihexyl-8,15-bis((triisopropylsilyl)ethynyl)naphtho[2,3-*l*]dipyrrolo[3,4-*a*:3',4'-*c*]phenazine-1,3,4,6(2*H*,5*H*)-tetraone (3a)**

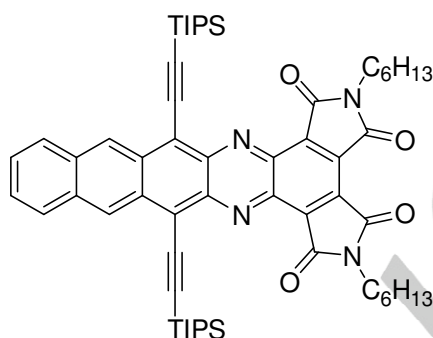

**3-H<sub>2</sub>** (45.0 mg, 47.4  $\mu$ mol, 1.00 eq) was dissolved in methylene chloride and an excess of manganese dioxide (>100 eq.) was added. The reaction mixture was stirred at 50 °C for 1 d until TLC showed full consumption of the dihydro species. The mixture was filtered through a PTFE filter and the solvent was removed under reduced pressure to yield **3a** as a brown solid (42.3 mg, 44.7  $\mu$ mol, 94%). <sup>1</sup>H NMR (600 MHz, CDCl<sub>3</sub>)  $\delta$  = 9.56 - 9.52 (m, 2H), 8.03 - 8.00 (m, 2H), 7.57 - 7.53 (m, 2H), 3.91 - 3.82 (m, 4H), 1.83 - 1.76 (m, 4H), 1.53 - 1.46 (m, 6H), 1.43 - 1.32 (m, 48H), 0.92 - 0.89 (m, 6H). <sup>13</sup>C NMR (151 MHz, CDCl<sub>3</sub>)  $\delta$  = 164.8, 164.8, 141.2, 139.9, 134.7, 134.6, 134.2, 130.3, 128.8, 128.0, 127.7, 123.0, 113.4, 102.9, 38.7, 31.4, 28.3, 26.5, 22.4, 19.0, 14.1, 11. HRMS (MALDI-, DCTB): *m/z* calcd. for C<sub>58</sub>H<sub>74</sub>N<sub>4</sub>O<sub>4</sub>Si<sub>2</sub>: [M]<sup>+</sup> 946.5249, found: 946.5251, correct isotope distribution. IR (ATR)  $\tilde{\nu}$  [cm<sup>-1</sup>] = 2925, 2861, 1779, 1720, 1456, 1436, 1396, 1366, 1011, 694, 673, 576, 458. M.p. = 150 °C dec.

**2,5-Dihexyl-8,12-bis((triisopropylsilyl)ethynyl)-7,13-dihydrodipyrrolo[3,4-*a*:3',4'-*c*] [1,2,5]thiadiazolo[3,4-*l*]phenazine-1,3,4,6(2*H*,5*H*)-tetraone (4-H<sub>2</sub>)**

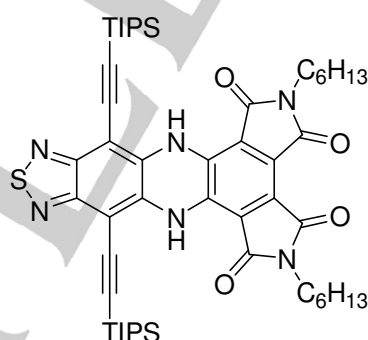

**GP** was applied to 4,7-bis((triisopropylsilyl)ethynyl)benzo[*c*][1,2,5]-thiadiazole-5,6-diamine **9** (58.1 mg, 110  $\mu$ mol, 1.00 eq.) and **MDI-Cl<sub>2</sub>** (50.0 mg, 110  $\mu$ mol, 1.00 eq.), using cesium carbonate (108 mg, 331  $\mu$ mol, 3.00 eq.) and PdRuPhos (G1) (4.50 mg, 5.51  $\mu$ mol, 5 mol%). The resulting crude product was purified by column chromatography (SiO<sub>2</sub>, PE/DCM 1:1) yielding **4-H<sub>2</sub>** as an orange-red solid (87.0 mg, 95.9  $\mu$ mol, 87%). *R<sub>f</sub>* (DCM:PE) = 0.29, <sup>1</sup>H NMR (600 MHz, CDCl<sub>3</sub>)  $\delta$  = 9.30 - 9.26 (m, 2H), 3.66 (t, *J* = 7.2 Hz, 4H), 1.70 - 1.62 (m, 4H), 1.36 - 1.28 (m, 18H), 1.25 - 1.19 (m, 36H), 0.90 - 0.86 (m, 6H). <sup>13</sup>C NMR (151 MHz, CDCl<sub>3</sub>)  $\delta$  = 167.6, 163.7, 152.0, 134.9, 132.4, 120.8, 113.1, 108.2, 97.7, 95.9, 38.7, 31.6, 28.1, 26.4, 22.4, 18.7, 14.0, 11.2. HRMS (MALDI+, DCTB): *m/z* calcd. for C<sub>50</sub>H<sub>70</sub>N<sub>6</sub>O<sub>4</sub>SSi<sub>2</sub>: [M+H]<sup>+</sup> 907.4791, found:

## COMMUNICATION

907.4771, correct isotope distribution. IR (ATR)  $\tilde{\nu}$  [cm<sup>-1</sup>] = 3306, 2941, 2863, 2359, 2342, 1765, 1698, 1567, 1513, 1489, 1455, 1431, 1398, 1352, 1310, 1275, 1260, 1111, 1017, 880, 818, 741, 669, 653, 630, 574, 500, 465. M.p. = 151 °C.

**2,5-Dihexyl-8,12-bis((triisopropylsilyl)ethynyl)dipyrrolo[3,4-*a*:3',4'-*c*][1,2,5]thiadiazolo[3,4-*l*]phenazine-1,3,4,6(2*H*,5*H*)-tetraone (4a)**

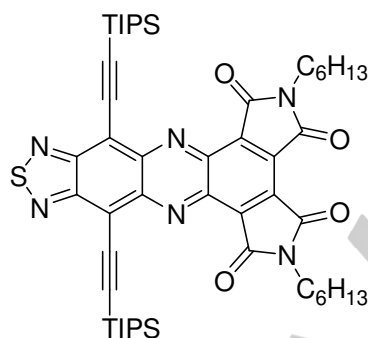

**4-H<sub>2</sub>** (45.0 mg, 49.6  $\mu$ mol, 1.00 eq) was dissolved in chloroform (10 mL) and an excess of PbO<sub>2</sub> (>100 eq.) was added. The reaction was then stirred at 65 °C for 2 d until NMR spectroscopy showed full consumption of the dihydro species. The reaction mixture was filtered through a PTFE filter to yield **4a** as a dark-green solid (41.3 mg, 45.6  $\mu$ mol, 92%). <sup>1</sup>H NMR (600 MHz, CDCl<sub>3</sub>)  $\delta$  = 3.85 (t, *J* = 7.2 Hz, 4H), 1.79 (quin, *J* = 7.3 Hz, 4H), 1.46 - 1.30 (m, 54H), 0.90 (br t, *J* = 7.2 Hz, 6H). <sup>13</sup>C NMR (151 MHz, CDCl<sub>3</sub>)  $\delta$  = 164.8, 164.7, 157.1, 143.0, 140.7, 135.1, 131.6, 116.8, 101.8, 39.1, 31.6, 28.6, 26.7, 22.7, 19.2, 14.4, 11.9. HRMS (MALDI-, DCTB): *m/z* calcd. for C<sub>50</sub>H<sub>68</sub>N<sub>6</sub>O<sub>4</sub>SSi<sub>2</sub>: [M]<sup>+</sup> 904.4561, found: 904.4560, correct isotope distribution. IR (ATR)  $\tilde{\nu}$  [cm<sup>-1</sup>] = 2922, 2863, 1781, 1773, 1721, 1714, 1462, 1444, 1398, 1364, 1194, 1062, 1014, 996, 921, 880, 801, 734, 670, 656, 579, 503, 445, 406. M.p. = 206 °C.

**2,5-Dihexyl-8,15-bis((triisopropylsilyl)ethynyl)-7,16-dihydrodipyrrolo[3,4-*a*:3',4'-*c*]quinoxalino[2,3-*l*]phenazine-1,3,4,6(2*H*,5*H*)-tetraone (5-H<sub>2</sub>)**

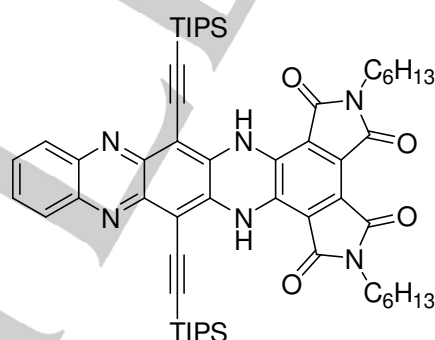

In a dry Schlenk tube bis((triisopropylsilyl)ethynyl)phenazine-2,3-diamine **10** (75.6 mg, 132  $\mu$ mol, 1.20 eq.), **MDI-Cl<sub>2</sub>** (50.0 mg, 110  $\mu$ mol, 1.00 eq), Pd<sub>2</sub>(dba)<sub>3</sub> (5.05 mg, 5.51  $\mu$ mol, 5 mol%) and RuPhos (5.15 mg, 11.0  $\mu$ mol, 10 mol%) were placed under argon atmosphere. Then degassed Hünig's base (2 mL) was added and the reaction was stirred at 120 °C for 16 h. The reaction mixture was diluted with methylene chloride and water was added. The phases were separated and the aqueous layer was extracted with methylene chloride (3x10 mL). The combined organic layers were dried over MgSO<sub>4</sub>, filtered through a paper filter and the solvent was removed under reduced pressure. The crude product was purified by column chromatography (SiO<sub>2</sub>, PE/DCM 1:1) to yield **5-H<sub>2</sub>** as a pink-red solid (63.3 mg, 66.5  $\mu$ mol,



## COMMUNICATION

60%).  $R_f$  (DCM:PE) = 0.31,  $^1\text{H NMR}$  (301 MHz,  $\text{CDCl}_3$ )  $\delta$  = 9.48 (s, 2H), 8.05 - 7.95 (m, 2H), 7.72 - 7.63 (m, 2H), 3.67 (t,  $J$  = 7.0 Hz, 4H), 1.76 - 1.61 (m, 4H), 1.44 - 1.17 (m, 54H), 0.95 - 0.82 (m, 6H).  $^{13}\text{C NMR}$  (151 MHz,  $\text{CDCl}_3$ )  $\delta$  = 167.8, 164.0, 143.0, 135.7, 132.4, 130.0, 129.6, 128.1, 121.0, 113.4, 108.8, 103.4, 97.3, 38.4, 31.4, 29.9, 26.5, 22.6, 19.0, 14.2, 11.5. HRMS (MALDI+, DCTB):  $m/z$  calcd. for  $\text{C}_{56}\text{H}_{75}\text{N}_6\text{O}_4\text{Si}_2$ :  $[\text{M}+\text{H}]^+$  951.5383, found: 951.5391, correct isotope distribution. IR (ATR)  $\tilde{\nu}$  [ $\text{cm}^{-1}$ ] = 3303, 2940, 2924, 2861, 2359, 2341, 1760, 1698, 1577, 1518, 1350, 1254, 1215, 1095, 1019, 881, 749, 722, 697, 660, 628, 590, 470. M.p. = 261 °C.

**2,5-Dihexyl-8,15-bis((triisopropylsilyl)ethynyl)dipyrrolo[3,4-*a*:3',4'-*c*]quinoxalino[2,3-*l*]phenazine-1,3,4,6(2*H*,5*H*)-tetraone (5a)**

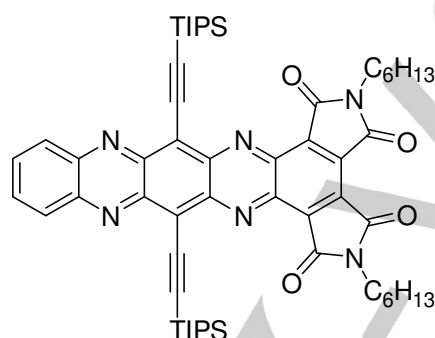

**5-H<sub>2</sub>** (22.0 mg, 23.1  $\mu\text{mol}$ , 1.00 eq.) was dissolved in methylene chloride (1 mL) in a glove box. Then an excess of  $\text{PbO}_2$  (>100 eq.) was added. The reaction was stirred at rt for 3 d. The reaction mixture was filtered through a PTFE filter to yield **5a** as a brown solid (20.2 mg, 21.3  $\mu\text{mol}$ , 92%)  $^1\text{H NMR}$  (600 MHz,  $\text{CDCl}_3$ )  $\delta$  = 8.25 - 8.16 (m, 2H), 7.97 - 7.89 (m, 2H), 3.85 (t,  $J$  = 7.2 Hz, 4H), 1.80 (quin,  $J$  = 7.2 Hz, 4H), 1.48 - 1.33 (m, 55H), 0.94 - 0.90 (m, 6H).  $^{13}\text{C NMR}$  (151 MHz,  $\text{CDCl}_3$ )  $\delta$  = 165.0, 164.8, 146.8, 145.1, 143.2, 140.8, 135.2, 133.9, 131.7, 130.7, 125.1, 116.7, 103.1, 38.9, 31.6, 28.6, 26.7, 22.8, 19.0, 14.1, 12.0. HRMS (MALDI-, DCTB):  $m/z$  calcd. for  $\text{C}_{54}\text{H}_{74}\text{N}_6\text{O}_4\text{Si}_2$ :  $[\text{M}]^-$  948.5159, found: 948.5152, correct isotope distribution. IR (ATR)  $\tilde{\nu}$  [ $\text{cm}^{-1}$ ] = 2926, 2861, 1778, 1722, 1523, 1442, 1388, 1361, 1127, 1062, 1016, 880, 765, 745, 736, 673, 594, 447. M.p. = 185 °C dec.

## COMMUNICATION

**2,5,13,16-Tetrahexyl-9,20-bis([tri(propan-2-yl)silyl]ethynyl)-7,11,18,22-tetrahydrotetrapyrrolo[3,4-*h*:3,4-*h'*:3,4-*j*:3,4-*j'*]benzo[1,2-*b*:4,5-*b'*]diphenazine-1,3,4,6,12,14,15,17(2*H*,5*H*,13*H*,16*H*)-octone (12-H<sub>4</sub>)**

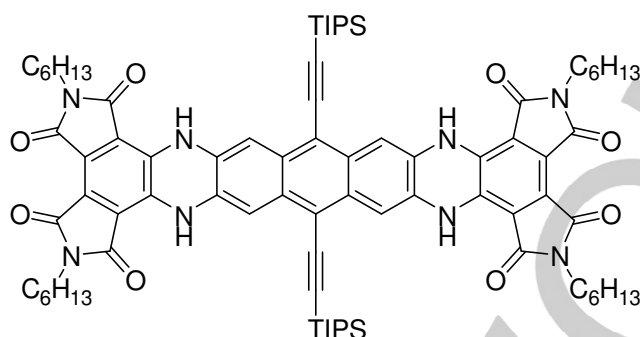

**GP** was applied to 9,10-bis((triisopropylsilyl)ethynyl)anthracene-2,3,6,7-tetraaminiumchloride **11** (100 mg, 134  $\mu\text{mol}$ , 1.00 eq.) and **MDI-Cl<sub>2</sub>** (137 mg, 302  $\mu\text{mol}$ , 2.25 eq.), using cesium carbonate (875 mg, 2.69 mmol, 20.0 eq.) and PdRuPhos (G1) (11.0 mg, 13.4  $\mu\text{mol}$ , 10 mol%). The resulting crude product was purified via column chromatography (SiO<sub>2</sub>, PE/EE 5:1) then washed with methanol and PE and subsequently purified via preparative GPC (CHCl<sub>3</sub>) yielding **12-H<sub>4</sub>** as a dark purple solid (59.3 mg, 42.9  $\mu\text{mol}$ , 32%). *R<sub>f</sub>* (DCM:PE) = 0. <sup>1</sup>H NMR (600 MHz, CD<sub>2</sub>Cl<sub>2</sub>)  $\delta$  = 8.46 (s, 4H), 7.36 - 7.34 (m, 4H), 3.63 (br t, *J* = 7.2 Hz, 8H), 1.68 - 1.63 (m, 8H), 1.34 - 1.29 (m, 66H), 0.90 (br t, *J* = 6.9 Hz, 12H). <sup>13</sup>C NMR (151 MHz, CD<sub>2</sub>Cl<sub>2</sub>)  $\delta$  = 168.8, 164.0, 134.4, 131.3, 129.6, 120.00, 114.7, 111.4, 108.9, 102.9, 31.7, 28.7, 26.8, 22.8, 19.0, 14.1, 11.9. HRMS (MALDI<sup>+</sup>, DCTB): *m/z* calcd. for C<sub>80</sub>H<sub>103</sub>N<sub>8</sub>O<sub>8</sub>Si<sub>2</sub>: [M+H]<sup>+</sup> 1359.7432, found: 1359.7429, correct isotope distribution. IR (ATR)  $\tilde{\nu}$  [cm<sup>-1</sup>] = 3345, 2924, 2854, 2362, 2341, 2331, 1769, 1698, 1685, 1570, 1498, 1465, 1364, 1278, 778, 758, 733, 691, 678, 550. M.p. = >330 °C.

**Butterfly-Dimer (13)**

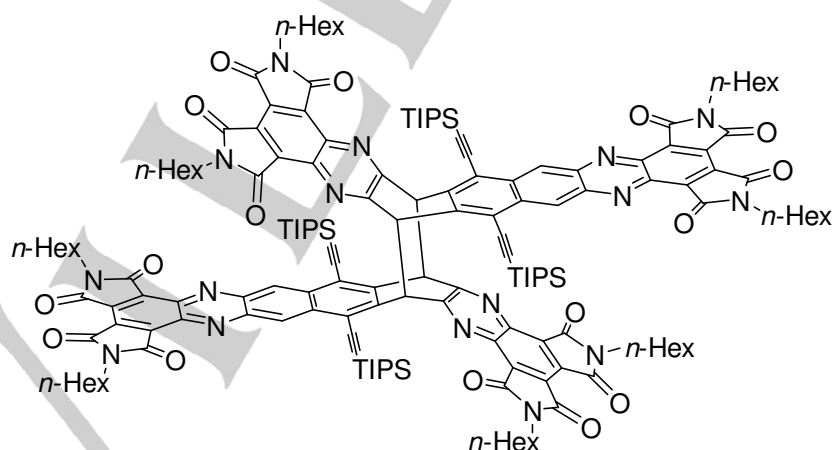

**12-H<sub>4</sub>** (2.00 mg, 1.47  $\mu\text{mol}$ , 1.00 eq) was dissolved in methylene chloride (500  $\mu\text{L}$ ) in a glove box. Then an excess of PbO<sub>2</sub> (>100 eq.) was added. The reaction was stirred at rt for 1 d. The reaction mixture was filtered through a PTFE filter to yield **13** as a green solid (2.60 mg, 960 nmol, 65%). <sup>1</sup>H NMR (600 MHz, CD<sub>2</sub>Cl<sub>2</sub>)  $\delta$  = 9.51 (s, 4H), 6.64 - 6.47 (m, 4H), 3.81 (br t, *J* = 7.3 Hz, 8H), 3.70 - 3.61 (m, 8H), 1.80 - 1.73 (m, 8H), 1.70 - 1.46 (m, 126H), 1.45 - 1.39 (m, 14H), 0.91 - 0.87 (m, 24H). <sup>13</sup>C NMR (151 MHz, CD<sub>2</sub>Cl<sub>2</sub>)  $\delta$  = 165.7, 165.0, 164.3, 164.1, 159.6,

## COMMUNICATION

142.3, 141.3, 139.6, 139.0, 135.2, 135.1, 133.6, 131.1, 131.0, 129.8, 122.3, 110.5, 101.1, 57.8, 39.2, 39.0, 32.0, 31.8, 29.0, 28.8, 27.1, 27.0, 23.1, 23.0, 19.6, 19.5, 14.4, 12.3. HRMS (MALDI+, DCTB):  $m/z$  calcd. for  $C_{160}H_{196}N_{16}O_{16}Si_4$ :  $[M/2]^+$  1354.7046, found: 1354.7027, correct isotope distribution. IR (ATR)  $\tilde{\nu}$  [ $cm^{-1}$ ] = 2955, 2922, 2853, 2359, 2341, 1773, 1725, 1458, 1391, 1376, 1365, 1259, 1083, 1014, 880, 702, 679, 670, 661, 403. One constitutional isomer selectively formed, but as we did not obtain a single crystal suitable for crystal structure analysis, we cannot distinguish between the head-to-tail and the head-to-head dimer (see Figure S1).

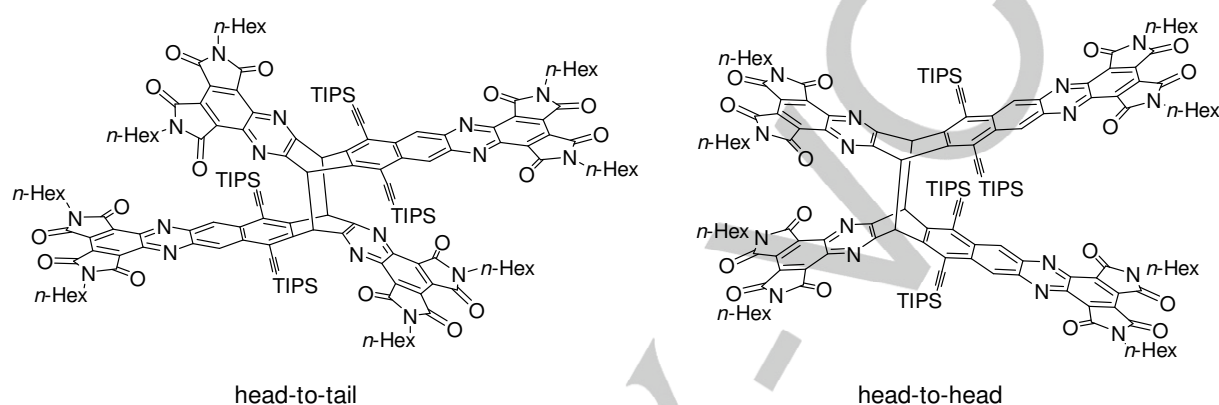

**Figure S1.** Two possible constitutional isomers of the butterfly dimer **13**.

## 3) Cyclic Voltammetry

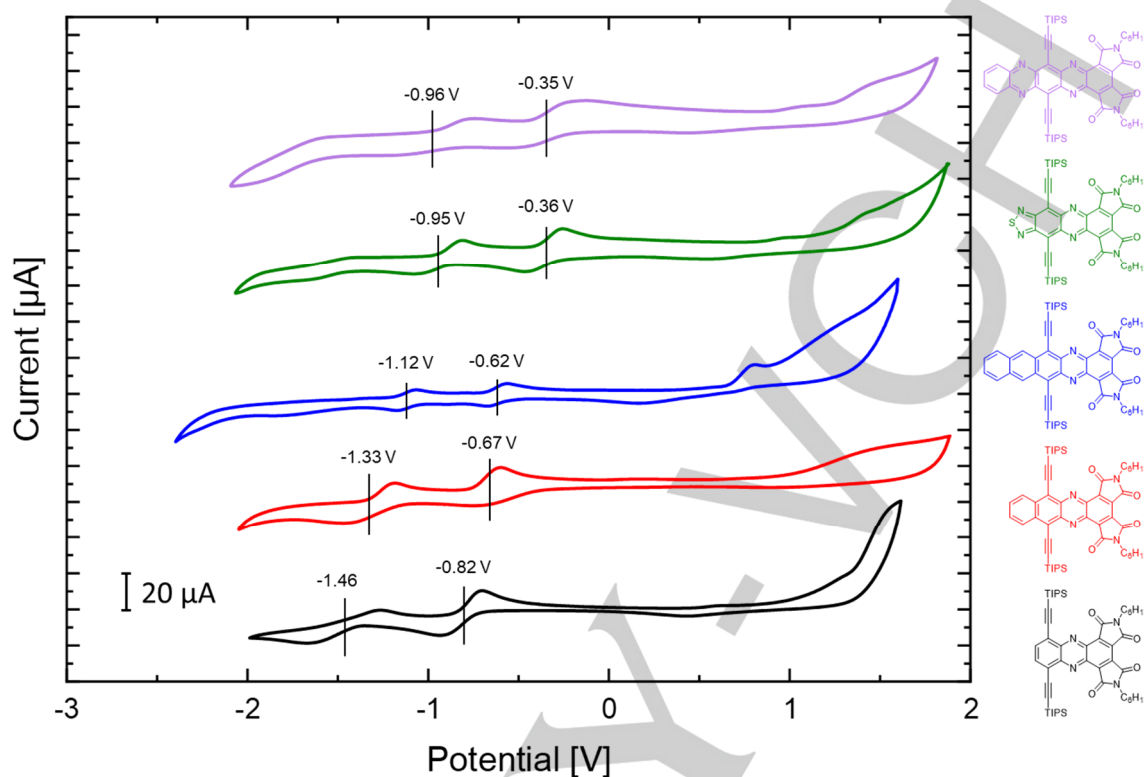

**Figure S2.** Cyclic voltammograms of **1a** (black), **2a** (red), **3a** (blue), **4a** (green), **5a** (purple) in  $\text{CH}_2\text{Cl}_2$  using  $\text{Bu}_4\text{NPF}_6$  as electrolyte and  $\text{Fc}/\text{Fc}^+$  as internal standard at  $0.2 \text{ V s}^{-1}$ .

**Table S1.** Optical, electrochemical and quantum-chemical data of the azaacenebisimides and their parent compounds.

| Compound                 | $E_{(0/-)}$ [V] <sup>[a]</sup> | $E_A$ [eV] <sup>[b]</sup> | $E_{\text{LUMO, DFT}}$ [eV] <sup>[c]</sup> | IP [eV] <sup>[d]</sup> | $E_{\text{HOMO, DFT}}$ [eV] <sup>[c]</sup> | gap <sub>DFT</sub> [eV] | $\lambda_{\text{max, abs}}$ [nm] | opt. gap [eV] <sup>[e]</sup> |
|--------------------------|--------------------------------|---------------------------|--------------------------------------------|------------------------|--------------------------------------------|-------------------------|----------------------------------|------------------------------|
| <b>1a</b>                | -0.82                          | -4.28                     | -3.92                                      | -6.32                  | -6.27                                      | 2.35                    | 550                              | 2.05                         |
| <b>1b</b> <sup>[f]</sup> | -1.68                          | -3.42                     | -3.08                                      | -6.12                  | -5.97                                      | 2.88                    | 440                              | 2.67                         |
| <b>2a</b>                | -0.67                          | -4.43                     | -4.04                                      | -5.99                  | -5.83                                      | 1.79                    | 733                              | 1.56                         |
| <b>2b</b> <sup>[f]</sup> | -1.23                          | -3.87                     | -3.35                                      | -5.99                  | -5.54                                      | 2.20                    | 570                              | 2.09                         |
| <b>3a</b>                | -0.62                          | -4.48                     | -4.10                                      | -5.87                  | -5.50                                      | 1.40                    | 908                              | 1.31                         |
| <b>3b</b> <sup>[f]</sup> | -1.05                          | -4.15                     | -3.50                                      | -5.80                  | -5.25                                      | 1.75                    | 692                              | 1.74                         |
| <b>4a</b>                | -0.36                          | -4.74                     | -4.37                                      | -6.29                  | -6.03                                      | 1.66                    | 766                              | 1.55                         |
| <b>4b</b> <sup>[g]</sup> | -0.83                          | -4.27                     | -3.85                                      | -6.13                  | -5.77                                      | 1.82                    | 642                              | 1.86                         |
| <b>5a</b>                | -0.35                          | -4.75                     | -4.30                                      | -6.19                  | -5.80                                      | 1.50                    | 813                              | 1.44                         |
| <b>5b</b> <sup>[h]</sup> | -0.79                          | -4.07                     | -3.43                                      | -5.89                  | -5.29                                      | 1.86                    | 680                              | 1.82                         |

<sup>[a]</sup>First reduction potentials measured by cyclic voltammetry (CV) in dichloromethane with  $\text{Bu}_4\text{NPF}_6$  as the electrolyte against  $\text{Fc}/\text{Fc}^+$  as an internal standard ( $-5.10 \text{ eV}$ ) at  $0.2 \text{ V s}^{-1}$ . <sup>[b]</sup>Calculated from CV measurements ( $E_A = -5.10 \text{ eV} - E_{(0/-)}^{[\text{S10}]}$ ) <sup>[c]</sup>Obtained from quantum-chemical calculations with DFT/B3LYP/def2-TZVP <sup>[d]</sup>IP =  $E_A - \text{Opt.Gap}$  <sup>[e]</sup>Calculated from  $\lambda_{\text{onset, abs}}$ . <sup>[f]</sup>CV data and quantum-chemical calculations taken from reference [S11] and adjusted for  $\text{Fc}/\text{Fc}^+ = -5.10 \text{ eV}$  <sup>[g]</sup>CV data and quantum-chemical calculations taken from reference [S12] <sup>[h]</sup>CV data and quantum-chemical calculations taken from reference [S13] and adjusted for  $\text{Fc}/\text{Fc}^+ = -5.10 \text{ eV}$ .

## 4) Optical Spectroscopy

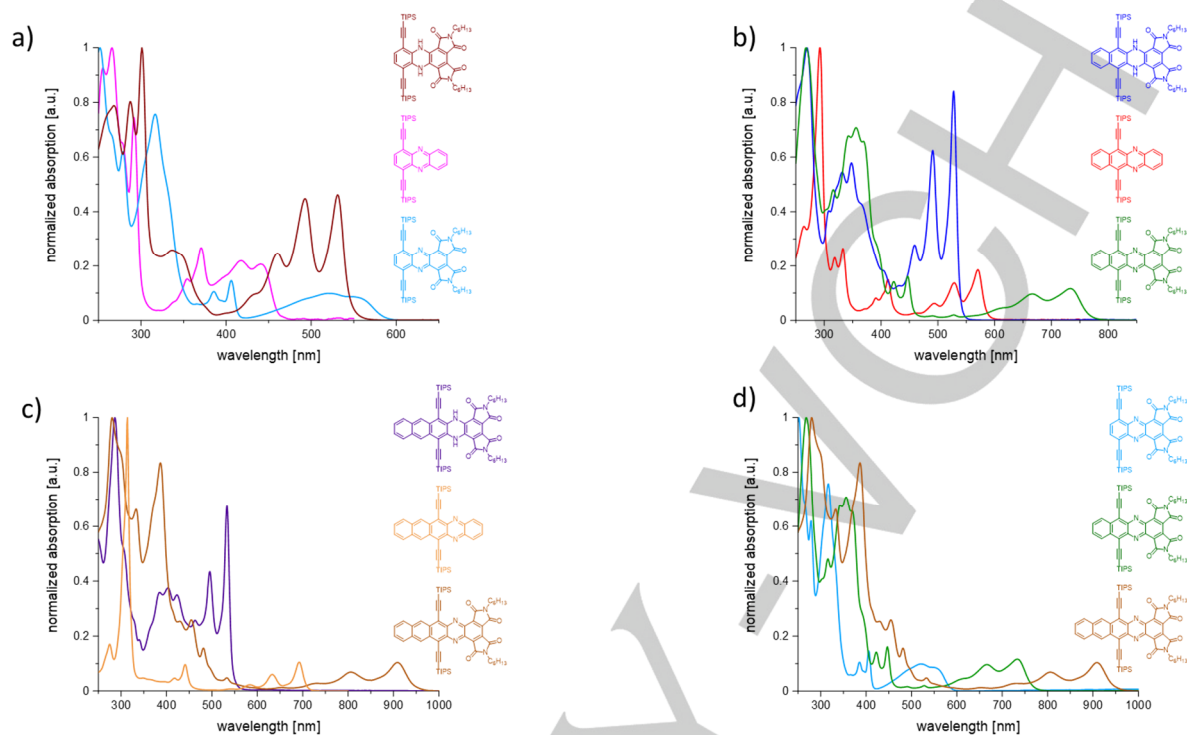

**Figure S3.** Absorption spectra of the a) diazaanthracenes, b) diazatetracenes, c) diazapentacenes and their respective dihydro-species. The absorption spectra of the diazacenibisimides in relation to each other are shown in d).

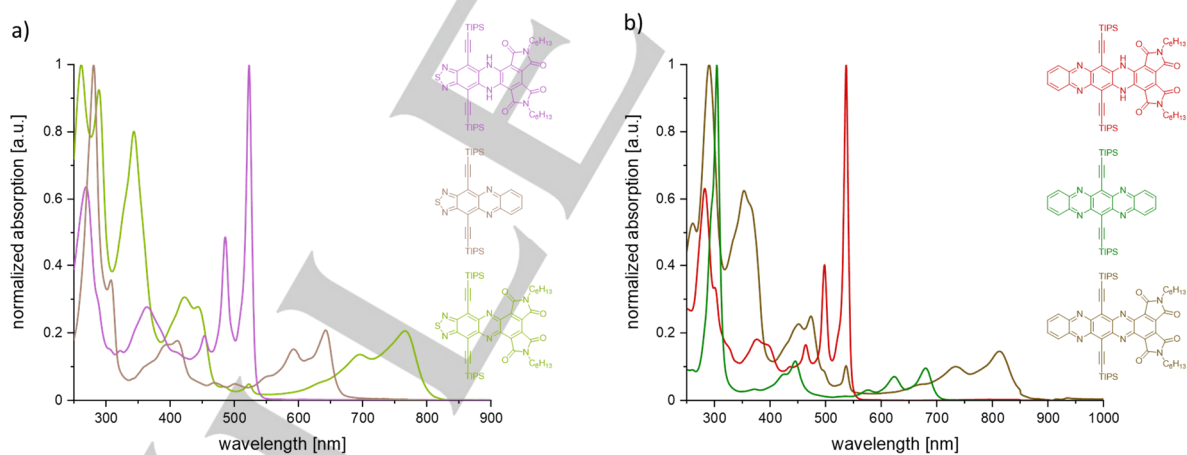

**Figure S4.** Absorption spectra of the a) thiadiazolacenes and b) tetraazapentacenes and their respective dihydro species.

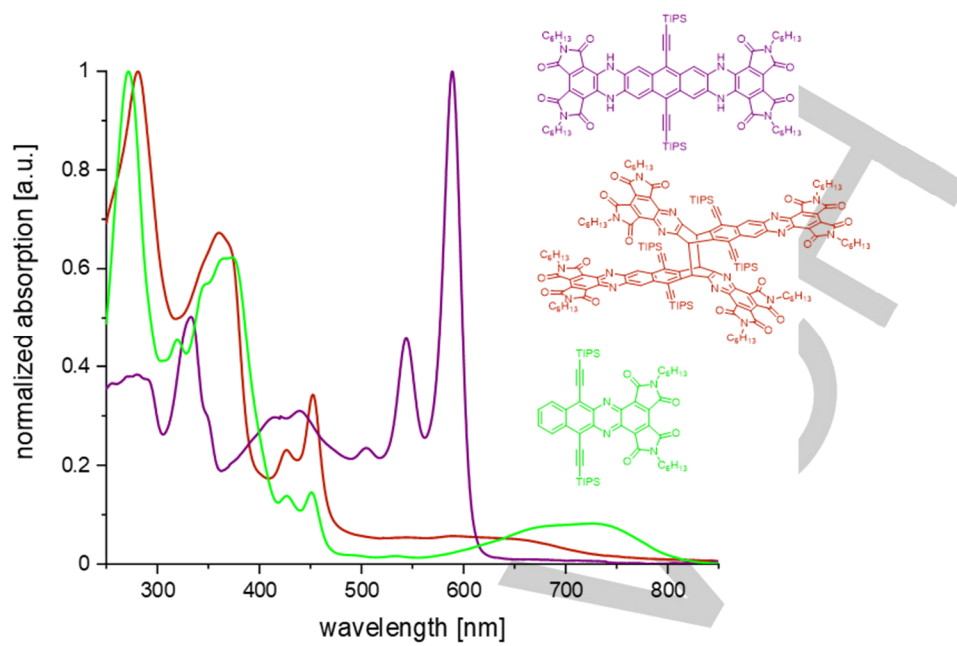

**Figure S5.** Absorption spectra of **2a**, **12-H<sub>4</sub>** and **13**.

## 5) Geometry and Energy computation

Geometry optimizations were performed using the B3LYP functional and def2SVP basis set. At this geometry, the absolute energy and FMO energies were determined by a single-point approach at the B3LYP/def2TZVP level.

Energy and cartesian coordinates for **1a**:

Total Energy = -2575.53647331 Hartree

No imaginary frequencies.

Table S2: Cartesian coordinates 1a.

| Tag | Symbol | X          | Y          | Z          |
|-----|--------|------------|------------|------------|
| 1   | C      | 0.6910653  | -5.2798054 | 0.1287146  |
| 2   | C      | -0.6931087 | -5.2791317 | -0.1377764 |
| 3   | C      | -1.4146702 | -4.1128656 | -0.2743909 |
| 4   | C      | -0.7109664 | -2.8598083 | -0.1361797 |
| 5   | C      | 0.7093228  | -2.8605142 | 0.1355012  |
| 6   | C      | 1.412858   | -4.1141696 | 0.2691364  |
| 7   | N      | -1.3824399 | -1.7216624 | -0.2616131 |
| 8   | C      | -0.7106923 | -0.5770617 | -0.1319007 |
| 9   | C      | 0.7103041  | -0.5778145 | 0.1370352  |
| 10  | N      | 1.3812957  | -1.7230869 | 0.2643715  |
| 11  | C      | -1.3662919 | 0.6791263  | -0.2543101 |
| 12  | C      | -0.6909994 | 1.8698034  | -0.1275511 |
| 13  | C      | 0.6935143  | 1.869033   | 0.1329435  |
| 14  | C      | 1.3672217  | 0.6775588  | 0.260407   |
| 15  | C      | 1.6794044  | 2.9914907  | 0.3218598  |
| 16  | N      | 2.9068864  | 2.3702997  | 0.5512149  |
| 17  | C      | 2.8154535  | 0.9778197  | 0.5340157  |
| 18  | C      | -2.8142222 | 0.9812382  | -0.5274903 |
| 19  | N      | -2.9034421 | 2.3738156  | -0.5473509 |
| 20  | C      | -1.6751581 | 2.9934679  | -0.3181023 |
| 21  | O      | -3.7387018 | 0.2298584  | -0.7037104 |
| 22  | O      | -1.493649  | 4.1822031  | -0.2948866 |
| 23  | O      | 1.4996739  | 4.1804697  | 0.2973429  |
| 24  | O      | 3.7384644  | 0.2252671  | 0.7129991  |
| 25  | C      | 2.8030407  | -4.1214821 | 0.536656   |
| 26  | C      | -2.8045941 | -4.1196381 | -0.5433733 |
| 27  | C      | -3.9949944 | -4.1130358 | -0.7751292 |
| 28  | C      | 3.9938364  | -4.1138265 | 0.7663205  |
| 29  | C      | -9.0593673 | 5.5855131  | 2.5332758  |
| 30  | C      | -8.283559  | 5.265147   | 1.2571004  |
| 31  | C      | -6.9846818 | 4.5012573  | 1.5158737  |
| 32  | C      | -6.2019569 | 4.1769353  | 0.2432096  |
| 33  | C      | -4.9056857 | 3.4125363  | 0.5101348  |

## COMMUNICATION

|    |    |            |            |            |
|----|----|------------|------------|------------|
| 34 | C  | -4.1433692 | 3.1030985  | -0.7785944 |
| 35 | C  | 9.0590262  | 5.5745204  | -2.5439965 |
| 36 | C  | 8.2862929  | 5.2549129  | -1.2657629 |
| 37 | C  | 6.9853491  | 4.4934424  | -1.5212516 |
| 38 | C  | 6.2056964  | 4.1696536  | -0.2465636 |
| 39 | C  | 4.9074688  | 3.4075346  | -0.5104746 |
| 40 | C  | 4.1481843  | 3.0980254  | 0.7800416  |
| 41 | Si | 5.7965477  | -3.9527731 | 1.1190762  |
| 42 | C  | 6.6354223  | -5.5828521 | 0.7068987  |
| 43 | C  | 5.9945583  | -3.5522638 | 2.9433046  |
| 44 | C  | 6.4634606  | -2.5604767 | 0.0545651  |
| 45 | Si | -5.7990497 | -3.9571675 | -1.1234386 |
| 46 | C  | -6.4053575 | -5.5708666 | -1.8713302 |
| 47 | C  | -6.0285382 | -2.5299628 | -2.3176548 |
| 48 | C  | -6.6741589 | -3.6156133 | 0.5030824  |
| 49 | H  | 1.2051071  | -6.2265085 | 0.2261983  |
| 50 | H  | -1.2073561 | -6.2253509 | -0.2388068 |
| 51 | H  | -9.9798846 | 6.1300556  | 2.3140766  |
| 52 | H  | -9.3333397 | 4.672932   | 3.068649   |
| 53 | H  | -8.4643695 | 6.2002602  | 3.2133198  |
| 54 | H  | -8.0543721 | 6.1953557  | 0.7264799  |
| 55 | H  | -8.9172019 | 4.6797266  | 0.5823481  |
| 56 | H  | -7.213577  | 3.5700994  | 2.046766   |
| 57 | H  | -6.3501738 | 5.0868891  | 2.1908059  |
| 58 | H  | -5.9713422 | 5.1084455  | -0.2859476 |
| 59 | H  | -6.8365241 | 3.5912062  | -0.4316034 |
| 60 | H  | -5.1286004 | 2.473516   | 1.0249179  |
| 61 | H  | -4.2605363 | 3.997497   | 1.1718181  |
| 62 | H  | -3.8784995 | 4.0261972  | -1.2951042 |
| 63 | H  | -4.7527003 | 2.4918707  | -1.4449724 |
| 64 | H  | 9.9811529  | 6.1172958  | -2.3271791 |
| 65 | H  | 9.3297973  | 4.6616971  | -3.0805782 |
| 66 | H  | 8.4631887  | 6.1906671  | -3.2220383 |
| 67 | H  | 8.0602954  | 6.1852693  | -0.7340241 |
| 68 | H  | 8.9208186  | 4.6679986  | -0.5931416 |
| 69 | H  | 7.2110903  | 3.5621991  | -2.0533058 |
| 70 | H  | 6.3499188  | 5.0805972  | -2.193993  |
| 71 | H  | 5.9781225  | 5.1011983  | 0.2838605  |
| 72 | H  | 6.8412062  | 3.5823677  | 0.4260037  |
| 73 | H  | 5.1275259  | 2.4686924  | -1.0267789 |
| 74 | H  | 4.2613736  | 3.9941273  | -1.1697782 |
| 75 | H  | 3.8858919  | 4.0210067  | 1.298091   |
| 76 | H  | 4.7583922  | 2.4852674  | 1.4442164  |
| 77 | H  | 6.4991778  | -5.8422758 | -0.3450696 |
| 78 | H  | 7.7096294  | -5.5244484 | 0.900847   |



## COMMUNICATION

|    |   |            |            |            |
|----|---|------------|------------|------------|
| 79 | H | 6.2308936  | -6.3997791 | 1.3082465  |
| 80 | H | 5.4862553  | -2.6187869 | 3.1921877  |
| 81 | H | 7.0511471  | -3.441152  | 3.2010774  |
| 82 | H | 5.5764525  | -4.341589  | 3.5713214  |
| 83 | H | 6.3642927  | -2.7947263 | -1.0074493 |
| 84 | H | 5.9154504  | -1.6359809 | 0.2469715  |
| 85 | H | 7.5221615  | -2.3848811 | 0.2634583  |
| 86 | H | -6.2508013 | -6.4077858 | -1.1870045 |
| 87 | H | -7.473643  | -5.515112  | -2.0963049 |
| 88 | H | -5.8792763 | -5.7971624 | -2.8011276 |
| 89 | H | -5.5987497 | -1.6139889 | -1.9074799 |
| 90 | H | -7.0896369 | -2.356096  | -2.515573  |
| 91 | H | -5.5372272 | -2.732562  | -3.2716751 |
| 92 | H | -6.5159036 | -4.4261531 | 1.2173914  |
| 93 | H | -6.306655  | -2.6921447 | 0.9545981  |
| 94 | H | -7.7509941 | -3.5102886 | 0.3465776  |

Energy and cartesian coordinates for **2a**:

Total Energy = -2729.22455736 Hartree

No imaginary frequencies.

Table S3: Cartesian coordinates 2a.

| Tag | Symbol | X          | Y          | Z          |
|-----|--------|------------|------------|------------|
| 1   | C      | 0.722562   | -4.8785541 | 0.4042501  |
| 2   | C      | -0.7217658 | -4.8786708 | 0.4042337  |
| 3   | C      | -1.4398909 | -3.6900192 | 0.171278   |
| 4   | C      | -0.7233643 | -2.480537  | -0.0640191 |
| 5   | C      | 0.7237921  | -2.4804201 | -0.0640196 |
| 6   | C      | 1.4405061  | -3.6897888 | 0.171304   |
| 7   | C      | -2.8530206 | -3.6627077 | 0.1637051  |
| 8   | C      | 2.8536342  | -3.6622765 | 0.1637779  |
| 9   | C      | 1.4008074  | -6.1104163 | 0.6455988  |
| 10  | C      | 0.7112402  | -7.2622702 | 0.8712648  |
| 11  | C      | -0.7100756 | -7.262386  | 0.8712403  |
| 12  | C      | -1.3998212 | -6.1106432 | 0.6455542  |
| 13  | C      | 4.0666757  | -3.6189471 | 0.152335   |
| 14  | C      | -4.0660634 | -3.6194518 | 0.1521663  |
| 15  | N      | -1.4073295 | -1.3528443 | -0.2832274 |
| 16  | N      | 1.4075696  | -1.3526194 | -0.2832777 |
| 17  | C      | 0.7266841  | -0.2366105 | -0.4996456 |
| 18  | C      | -0.7266323 | -0.2367242 | -0.499599  |
| 19  | C      | -1.3930177 | 1.0013808  | -0.7386378 |
| 20  | C      | -0.7066349 | 2.16788    | -0.9646453 |
| 21  | C      | 0.7062615  | 2.1679866  | -0.9647261 |

|    |    |            |            |            |
|----|----|------------|------------|------------|
| 22 | C  | 1.3928518  | 1.0015963  | -0.7387778 |
| 23 | C  | 1.707049   | 3.2720922  | -1.1789542 |
| 24 | N  | 2.9576159  | 2.6658316  | -1.0599921 |
| 25 | C  | 2.8662481  | 1.2987543  | -0.7961191 |
| 26 | C  | -2.8664679 | 1.2983092  | -0.7957874 |
| 27 | N  | -2.9580796 | 2.6653531  | -1.0597468 |
| 28 | C  | -1.7076202 | 3.2718311  | -1.1787473 |
| 29 | O  | -1.5242185 | 4.4378545  | -1.4103753 |
| 30 | O  | -3.8080667 | 0.5598129  | -0.6577914 |
| 31 | O  | 1.5234367  | 4.4381031  | -1.4104797 |
| 32 | O  | 3.8079792  | 0.5604277  | -0.6581219 |
| 33 | Si | 5.8952976  | -3.3904124 | 0.0976353  |
| 34 | C  | 6.7115282  | -4.9025702 | 0.8594506  |
| 35 | C  | 6.3072762  | -1.8398757 | 1.0681156  |
| 36 | C  | 6.4002809  | -3.2053533 | -1.7016297 |
| 37 | Si | -5.8946762 | -3.3908972 | 0.0972912  |
| 38 | C  | -6.3069008 | -1.8414166 | 1.0693661  |
| 39 | C  | -6.7110601 | -4.9038965 | 0.8572643  |
| 40 | C  | -6.3992297 | -3.2038083 | -1.7018784 |
| 41 | C  | 8.4265097  | 6.623893   | 2.4231791  |
| 42 | C  | 7.9020607  | 6.0418191  | 1.1119881  |
| 43 | C  | 6.5790395  | 5.2920947  | 1.2705552  |
| 44 | C  | 6.0475684  | 4.7063144  | -0.0378095 |
| 45 | C  | 4.7252996  | 3.9581202  | 0.1285933  |
| 46 | C  | 4.2179267  | 3.3838673  | -1.1944755 |
| 47 | C  | -8.4276696 | 6.6224649  | 2.4234079  |
| 48 | C  | -7.9031235 | 6.0404682  | 1.1122214  |
| 49 | C  | -6.5799588 | 5.2909971  | 1.2707881  |
| 50 | C  | -6.0483915 | 4.7052928  | -0.0375717 |
| 51 | C  | -4.7259811 | 3.9573489  | 0.1288306  |
| 52 | C  | -4.2185195 | 3.3831618  | -1.1942326 |
| 53 | H  | 2.4818503  | -6.1041923 | 0.6446891  |
| 54 | H  | 1.2452217  | -8.1863501 | 1.0525005  |
| 55 | H  | -1.2439128 | -8.1865531 | 1.0524559  |
| 56 | H  | -2.480865  | -6.104593  | 0.6446088  |
| 57 | H  | 6.4572828  | -5.8108936 | 0.3088792  |
| 58 | H  | 7.7997713  | -4.7998342 | 0.8492683  |
| 59 | H  | 6.3989691  | -5.0403448 | 1.8967266  |
| 60 | H  | 5.7754818  | -0.9808567 | 0.6544426  |
| 61 | H  | 7.3802711  | -1.6331437 | 1.0313728  |
| 62 | H  | 6.0197163  | -1.9422868 | 2.1166049  |
| 63 | H  | 6.1328761  | -4.0898885 | -2.2832758 |
| 64 | H  | 5.9071785  | -2.3425483 | -2.1532501 |
| 65 | H  | 7.4806586  | -3.0606792 | -1.7858361 |
| 66 | H  | -5.7750304 | -0.9819573 | 0.6567035  |

|     |   |            |            |            |
|-----|---|------------|------------|------------|
| 67  | H | -7.3798868 | -1.6346486 | 1.0325791  |
| 68  | H | -6.0195938 | -1.9449276 | 2.1178157  |
| 69  | H | -6.4566944 | -5.8116089 | 0.3057421  |
| 70  | H | -7.7993017 | -4.8011577 | 0.8469722  |
| 71  | H | -6.3987147 | -5.0428145 | 1.8944525  |
| 72  | H | -5.9060384 | -2.3404575 | -2.1523577 |
| 73  | H | -6.1316423 | -4.0876564 | -2.2844831 |
| 74  | H | -7.4795918 | -3.0590773 | -1.7861877 |
| 75  | H | 9.3705951  | 7.1519676  | 2.2755571  |
| 76  | H | 7.7141791  | 7.3321771  | 2.8536733  |
| 77  | H | 8.5980909  | 5.8383688  | 3.1634535  |
| 78  | H | 8.6511454  | 5.364436   | 0.6882455  |
| 79  | H | 7.7739473  | 6.8471586  | 0.3809447  |
| 80  | H | 5.8289471  | 5.96973    | 1.6939834  |
| 81  | H | 6.7066692  | 4.4859507  | 2.0020745  |
| 82  | H | 6.7976728  | 4.0283484  | -0.4607539 |
| 83  | H | 5.9184225  | 5.5129799  | -0.768258  |
| 84  | H | 3.9669761  | 4.6326894  | 0.5361555  |
| 85  | H | 4.84926    | 3.1416881  | 0.8459047  |
| 86  | H | 4.9420149  | 2.6811458  | -1.6078669 |
| 87  | H | 4.0541272  | 4.1831352  | -1.9179886 |
| 88  | H | -9.3718564 | 7.1503583  | 2.2757864  |
| 89  | H | -8.5990947 | 5.8369208  | 3.1636972  |
| 90  | H | -7.715469  | 7.3308912  | 2.853883   |
| 91  | H | -7.7751702 | 6.8458195  | 0.381163   |
| 92  | H | -8.6520841 | 5.3629359  | 0.6884981  |
| 93  | H | -6.7074281 | 4.4848425  | 2.0023237  |
| 94  | H | -5.82999   | 5.968782   | 1.6941956  |
| 95  | H | -5.919405  | 5.5119689  | -0.7680365 |
| 96  | H | -6.7983734 | 4.0271783  | -0.4604957 |
| 97  | H | -4.8497805 | 3.1409095  | 0.8461612  |
| 98  | H | -3.967778  | 4.6320681  | 0.5363686  |
| 99  | H | -4.0548688 | 4.182445   | -1.9177622 |
| 100 | H | -4.942489  | 2.6803056  | -1.6076032 |

Energy and cartesian coordinates for **3a**:

Total Energy = -2882.91176840 Hartree

No imaginary frequencies.

Table S4: Cartesian coordinates 3a.

| Tag | Symbol | X          | Y         | Z          |
|-----|--------|------------|-----------|------------|
| 1   | C      | -0.7048999 | 9.1602884 | 0.1322162  |
| 2   | C      | 0.6985044  | 9.1607783 | -0.132186  |
| 3   | C      | 1.3797354  | 7.9910001 | -0.2605806 |

## COMMUNICATION

|    |   |            |            |            |
|----|---|------------|------------|------------|
| 4  | C | 0.7080929  | 6.73462    | -0.1340459 |
| 5  | C | -0.7127956 | 6.7341239  | 0.1340733  |
| 6  | C | -1.3853145 | 7.9900348  | 0.2606091  |
| 7  | C | 1.3729525  | 5.5268745  | -0.2597616 |
| 8  | C | 0.7115604  | 4.2918717  | -0.134953  |
| 9  | C | -0.7145584 | 4.2913725  | 0.1349735  |
| 10 | C | -1.3768122 | 5.5259138  | 0.2597858  |
| 11 | C | 1.4161938  | 3.0681753  | -0.2684171 |
| 12 | C | 0.7119694  | 1.8443828  | -0.1345562 |
| 13 | C | -0.7132603 | 1.843882   | 0.1345682  |
| 14 | C | -1.41834   | 3.0671834  | 0.2684284  |
| 15 | N | 1.3840554  | 0.6905807  | -0.2601754 |
| 16 | C | 0.7162982  | -0.4427055 | -0.1339302 |
| 17 | C | -0.7159748 | -0.4432107 | 0.1339524  |
| 18 | N | -1.3845324 | 0.6896057  | 0.2601933  |
| 19 | C | 1.3711246  | -1.7059619 | -0.2550272 |
| 20 | C | 0.6966311  | -2.8929087 | -0.1294617 |
| 21 | C | -0.6945678 | -2.8934018 | 0.1294975  |
| 22 | C | -1.369904  | -1.7069323 | 0.2550584  |
| 23 | C | -1.6763072 | -4.0190331 | 0.3169453  |
| 24 | N | -2.9070869 | -3.4027387 | 0.5431501  |
| 25 | C | -2.8182837 | -2.0104576 | 0.5252109  |
| 26 | C | 2.8197205  | -2.0084579 | -0.525177  |
| 27 | N | 2.9095121  | -3.4006759 | -0.5431117 |
| 28 | C | 1.6791706  | -4.0178429 | -0.3169021 |
| 29 | O | 1.496286   | -5.2066017 | -0.2941492 |
| 30 | O | -1.4925793 | -5.2076616 | 0.2941921  |
| 31 | O | -3.7438708 | -1.2598668 | 0.7013835  |
| 32 | O | 3.7447756  | -1.2572089 | -0.7013388 |
| 33 | C | -2.8049976 | 3.0380801  | 0.5323411  |
| 34 | C | 2.8028705  | 3.0400313  | -0.5323297 |
| 35 | C | 3.9949733  | 3.0006708  | -0.7602841 |
| 36 | C | -3.9970775 | 2.9979486  | 0.7602836  |
| 37 | C | -9.0392647 | -6.6416604 | -2.5564548 |
| 38 | C | -8.2706744 | -6.3147196 | -1.277561  |
| 39 | C | -6.9722598 | -5.5487786 | -1.5325722 |
| 40 | C | -6.1967743 | -5.2176498 | -0.2572282 |
| 41 | C | -4.9009918 | -4.4511724 | -0.5204584 |
| 42 | C | -4.1459252 | -4.13435   | 0.7707641  |
| 43 | C | 9.04393    | -6.6353468 | 2.5565012  |
| 44 | C | 8.2751304  | -6.3089111 | 1.2776042  |
| 45 | C | 6.9761644  | -5.5439063 | 1.5326172  |
| 46 | C | 6.2004669  | -5.2132872 | 0.2572699  |
| 47 | C | 4.9041358  | -4.4477385 | 0.5205011  |
| 48 | C | 4.1488692  | -4.1314085 | -0.7707251 |

|    |    |            |            |            |
|----|----|------------|------------|------------|
| 49 | Si | -5.7919163 | 2.7632956  | 1.1080513  |
| 50 | C  | -6.677328  | 4.3963068  | 0.8192599  |
| 51 | C  | -5.9683547 | 2.2268198  | 2.8991142  |
| 52 | C  | -6.4308234 | 1.434945   | -0.0508313 |
| 53 | Si | 5.789903   | 2.7668881  | -1.1081619 |
| 54 | C  | 6.6744374  | 4.4005019  | -0.8200967 |
| 55 | C  | 5.966431   | 2.2297904  | -2.8990266 |
| 56 | C  | 6.4296792  | 1.4393452  | 0.0511704  |
| 57 | H  | -1.2243641 | 10.105077  | 0.2299211  |
| 58 | H  | 1.2173092  | 10.1059294 | -0.2298898 |
| 59 | H  | 2.4441957  | 7.9898306  | -0.4610328 |
| 60 | H  | -2.4497741 | 7.9881222  | 0.4610602  |
| 61 | H  | 2.4361564  | 5.5219843  | -0.4604396 |
| 62 | H  | -2.4400126 | 5.5202801  | 0.4604616  |
| 63 | H  | -9.9596698 | -7.1875098 | -2.3399515 |
| 64 | H  | -9.3125271 | -5.7316961 | -3.0966319 |
| 65 | H  | -8.4393739 | -7.2575482 | -3.2311534 |
| 66 | H  | -8.0420887 | -7.2424166 | -0.7422875 |
| 67 | H  | -8.9091159 | -5.7282362 | -0.6082602 |
| 68 | H  | -7.2005745 | -4.6202112 | -2.0682057 |
| 69 | H  | -6.3329224 | -6.1355153 | -2.201965  |
| 70 | H  | -5.9666959 | -6.1465566 | 0.2767538  |
| 71 | H  | -6.8362523 | -4.6308248 | 0.4120131  |
| 72 | H  | -5.1234931 | -3.5149457 | -1.0404855 |
| 73 | H  | -4.2509313 | -5.037267  | -1.1762871 |
| 74 | H  | -3.881831  | -5.0547937 | 1.2925045  |
| 75 | H  | -4.7603534 | -3.5220144 | 1.431491   |
| 76 | H  | 9.9647288  | -7.1805311 | 2.3399966  |
| 77 | H  | 9.3165321  | -5.725206  | 3.0967146  |
| 78 | H  | 8.4444664  | -7.251686  | 3.2311675  |
| 79 | H  | 8.0472176  | -7.2367528 | 0.7422945  |
| 80 | H  | 8.9131655  | -5.7219489 | 0.6083356  |
| 81 | H  | 7.2038061  | -4.6151944 | 2.0682869  |
| 82 | H  | 6.3372333  | -6.131122  | 2.2019777  |
| 83 | H  | 5.9710583  | -6.14234   | -0.2767461 |
| 84 | H  | 6.8395404  | -4.6259868 | -0.4119411 |
| 85 | H  | 5.1259631  | -3.511371  | 1.0405631  |
| 86 | H  | 4.254479   | -5.0343153 | 1.1762984  |
| 87 | H  | 3.8854353  | -5.0520217 | -1.2925003 |
| 88 | H  | 4.7628768  | -3.5186175 | -1.4314207 |
| 89 | H  | -6.5519923 | 4.737348   | -0.2106083 |
| 90 | H  | -7.7489331 | 4.293244   | 1.0089051  |
| 91 | H  | -6.2955181 | 5.1771765  | 1.4805817  |
| 92 | H  | -5.4341264 | 1.2913166  | 3.0751374  |
| 93 | H  | -7.0201648 | 2.0693168  | 3.1523968  |

## COMMUNICATION

|     |   |            |           |            |
|-----|---|------------|-----------|------------|
| 94  | H | -5.5667114 | 2.9785875 | 3.5815729  |
| 95  | H | -7.4858491 | 1.2246682 | 0.1443847  |
| 96  | H | -6.3359844 | 1.7421581 | -1.09444   |
| 97  | H | -5.8640787 | 0.5113696 | 0.0821243  |
| 98  | H | 6.5490809  | 4.7418311 | 0.2096742  |
| 99  | H | 7.7460694  | 4.2979802 | -1.0098831 |
| 100 | H | 6.2920745  | 5.1809238 | -1.4816266 |
| 101 | H | 5.4326533  | 1.293946  | -3.0746032 |
| 102 | H | 7.0182926  | 2.0727133 | -3.1523598 |
| 103 | H | 5.5643333  | 2.9810759 | -3.5817483 |
| 104 | H | 7.4848627  | 1.2297444 | -0.1439161 |
| 105 | H | 6.3345601  | 1.7468111 | 1.0946793  |
| 106 | H | 5.86359    | 0.5153316 | -0.0815364 |

Energy and cartesian coordinates for **4a**:

Total Energy = -3082.06806549 Hartree

No imaginary frequencies.

Table S5: Cartesian coordinates 4a.

| Tag | Symbol | X          | Y          | Z          |
|-----|--------|------------|------------|------------|
| 1   | C      | -0.7110375 | 4.782355   | 0.1328502  |
| 2   | C      | 0.7157244  | 4.7813478  | -0.1404463 |
| 3   | C      | 1.4489797  | 3.5871631  | -0.2794503 |
| 4   | C      | 0.7178336  | 2.3736084  | -0.1369755 |
| 5   | C      | -0.715047  | 2.3746522  | 0.1357439  |
| 6   | C      | -1.4453895 | 3.5891728  | 0.274172   |
| 7   | N      | -1.219322  | 6.0305927  | 0.2290769  |
| 8   | S      | 0.0034279  | 7.0347704  | -0.0062103 |
| 9   | N      | 1.2251925  | 6.0288945  | -0.239355  |
| 10  | N      | 1.3830149  | 1.2165666  | -0.2605938 |
| 11  | C      | 0.7154577  | 0.0836412  | -0.1325702 |
| 12  | C      | -0.715142  | 0.0847338  | 0.13643    |
| 13  | N      | -1.3813695 | 1.2186409  | 0.2623605  |
| 14  | C      | 1.3698742  | -1.180048  | -0.2540272 |
| 15  | C      | 0.6936456  | -2.3653778 | -0.1284056 |
| 16  | C      | -0.6975649 | -2.3642709 | 0.1316163  |
| 17  | C      | -1.371533  | -1.1778247 | 0.2586024  |
| 18  | C      | -1.6815104 | -3.4895307 | 0.3189986  |
| 19  | N      | -2.9105043 | -2.8716476 | 0.5471368  |
| 20  | C      | -2.8202241 | -1.4794038 | 0.530543   |
| 21  | C      | 2.8182062  | -1.4841417 | -0.5250974 |
| 22  | N      | 2.9054674  | -2.8765446 | -0.545145  |
| 23  | C      | 1.6752832  | -3.4923017 | -0.3177787 |
| 24  | C      | -2.8265477 | 3.5881631  | 0.5381108  |

|    |    |            |            |            |
|----|----|------------|------------|------------|
| 25 | C  | -4.018671  | 3.5710913  | 0.7666097  |
| 26 | C  | 2.8297213  | 3.5849789  | -0.5456449 |
| 27 | C  | 4.0213453  | 3.5685962  | -0.7767911 |
| 28 | O  | -1.4977564 | -4.6778175 | 0.2942143  |
| 29 | O  | -3.7430544 | -0.7266466 | 0.7087333  |
| 30 | O  | 1.4890838  | -4.680251  | -0.294914  |
| 31 | O  | 3.743051   | -0.7329918 | -0.6994286 |
| 32 | Si | -5.8226081 | 3.4200327  | 1.1207122  |
| 33 | C  | -6.0150271 | 3.0173713  | 2.9452064  |
| 34 | C  | -6.4966378 | 2.0309181  | 0.0561966  |
| 35 | C  | -6.6499309 | 5.0553555  | 0.711244   |
| 36 | Si | 5.8277049  | 3.4230909  | -1.1208522 |
| 37 | C  | 6.4244678  | 5.0411634  | -1.8641164 |
| 38 | C  | 6.0671605  | 1.996947   | -2.3146539 |
| 39 | C  | 6.6948309  | 3.0833033  | 0.5104371  |
| 40 | C  | -9.0546821 | -6.0834444 | -2.5563216 |
| 41 | C  | -8.2837649 | -5.7634757 | -1.2770889 |
| 42 | C  | -6.9836933 | -4.9999203 | -1.5308079 |
| 43 | C  | -6.2058483 | -4.675761  | -0.2551056 |
| 44 | C  | -4.9085126 | -3.9114902 | -0.5172654 |
| 45 | C  | -4.1510078 | -3.6016515 | 0.7741511  |
| 46 | C  | 9.0482752  | -6.1035866 | 2.5458823  |
| 47 | C  | 8.2755975  | -5.7810979 | 1.2683486  |
| 48 | C  | 6.9780514  | -5.0142162 | 1.5249492  |
| 49 | C  | 6.1984532  | -4.6877382 | 0.2509107  |
| 50 | C  | 4.9034741  | -3.9203864 | 0.5157122  |
| 51 | C  | 4.1442794  | -3.6087458 | -0.7742627 |
| 52 | H  | -5.5904791 | 3.8039294  | 3.5722157  |
| 53 | H  | -7.0715639 | 2.9121771  | 3.2057447  |
| 54 | H  | -5.5113805 | 2.0806455  | 3.1911258  |
| 55 | H  | -6.3989248 | 2.2656316  | -1.0058149 |
| 56 | H  | -7.5557044 | 1.8601932  | 0.2672812  |
| 57 | H  | -5.9524976 | 1.1038704  | 0.2470665  |
| 58 | H  | -6.2336036 | 5.8689799  | 1.3086905  |
| 59 | H  | -6.5165204 | 5.312273   | -0.3415997 |
| 60 | H  | -7.7234736 | 5.0059565  | 0.911353   |
| 61 | H  | 6.254808   | 5.8759906  | -1.1810939 |
| 62 | H  | 7.4950032  | 4.9953152  | -2.0805383 |
| 63 | H  | 5.9029061  | 5.2622655  | -2.797589  |
| 64 | H  | 5.641109   | 1.0785874  | -1.9060189 |
| 65 | H  | 7.1298201  | 1.8289733  | -2.5092628 |
| 66 | H  | 5.5780146  | 2.1974184  | -3.2701966 |
| 67 | H  | 6.5288774  | 3.8927358  | 1.2241128  |
| 68 | H  | 6.3298315  | 2.1574994  | 0.9590823  |
| 69 | H  | 7.7728797  | 2.9837064  | 0.3584759  |

|    |   |            |            |            |
|----|---|------------|------------|------------|
| 70 | H | -9.9762162 | -6.6276999 | -2.3407556 |
| 71 | H | -9.3262662 | -5.1707071 | -3.0926269 |
| 72 | H | -8.4572519 | -6.6983207 | -3.2341101 |
| 73 | H | -8.0569296 | -6.6938114 | -0.7456763 |
| 74 | H | -8.9198468 | -5.1778959 | -0.6047839 |
| 75 | H | -7.2102791 | -4.0686901 | -2.062516  |
| 76 | H | -6.3467041 | -5.5857288 | -2.2032466 |
| 77 | H | -5.9773897 | -5.607279  | 0.2749735  |
| 78 | H | -6.8429212 | -4.089854  | 0.417173   |
| 79 | H | -5.1295219 | -2.9726902 | -1.0332527 |
| 80 | H | -4.2609085 | -4.4966842 | -1.1763484 |
| 81 | H | -3.8877257 | -4.5244531 | 1.2920091  |
| 82 | H | -4.7627575 | -2.990419  | 1.4383125  |
| 83 | H | 9.9678958  | -6.6502325 | 2.3282172  |
| 84 | H | 9.3234295  | -5.1917906 | 3.0819751  |
| 85 | H | 8.4505959  | -6.7171123 | 3.2246717  |
| 86 | H | 8.045193   | -6.7106311 | 0.7370786  |
| 87 | H | 8.9118531  | -5.1969976 | 0.5949212  |
| 88 | H | 7.2081651  | -4.0837338 | 2.0564899  |
| 89 | H | 6.3409242  | -5.5985289 | 2.1985538  |
| 90 | H | 5.9666303  | -5.6185533 | -0.2789293 |
| 91 | H | 6.8356154  | -4.1033032 | -0.4225646 |
| 92 | H | 5.1276599  | -2.982086  | 1.0312721  |
| 93 | H | 4.2557869  | -4.5040645 | 1.1760623  |
| 94 | H | 3.8782499  | -4.5309371 | -1.2917868 |
| 95 | H | 4.7561378  | -2.9987573 | -1.4394562 |

Energy and cartesian coordinates for **5a**:

Total Energy = -2914.99176313 Hartree

No imaginary frequencies.

Table S6: Cartesian coordinates 5a.

| Tag | Symbol | X          | Y         | Z          |
|-----|--------|------------|-----------|------------|
| 1   | C      | 0.7275597  | 4.3171816 | 0.1835591  |
| 2   | C      | -0.7225276 | 4.318064  | 0.1835311  |
| 3   | C      | -1.4502291 | 3.1173057 | -0.0101388 |
| 4   | C      | -0.7248449 | 1.9110942 | -0.2031517 |
| 5   | C      | 0.7269864  | 1.9102133 | -0.2031172 |
| 6   | C      | 1.4538183  | 3.115543  | -0.0100671 |
| 7   | C      | -2.8584622 | 3.1050555 | -0.0141162 |
| 8   | C      | 2.8620356  | 3.1016224 | -0.0139867 |
| 9   | N      | 1.4127314  | 5.4609681 | 0.3679759  |
| 10  | C      | 0.7297863  | 6.5773279 | 0.5482906  |
| 11  | C      | -0.7220139 | 6.5782132 | 0.5482611  |



|    |    |            |            |            |
|----|----|------------|------------|------------|
| 12 | N  | -1.4063142 | 5.4626845  | 0.3679243  |
| 13 | C  | 4.074521   | 3.0459115  | -0.0255923 |
| 14 | C  | -4.0710114 | 3.0507371  | -0.0257734 |
| 15 | N  | -1.4073071 | 0.7712863  | -0.385497  |
| 16 | N  | 1.4080811  | 0.7695871  | -0.3854484 |
| 17 | C  | 0.7279345  | -0.3489693 | -0.5639115 |
| 18 | C  | -0.728506  | -0.348091  | -0.5639278 |
| 19 | C  | -1.3954928 | -1.5954771 | -0.7619292 |
| 20 | C  | -0.7093528 | -2.7672303 | -0.9482079 |
| 21 | C  | 0.7058674  | -2.7680845 | -0.9481932 |
| 22 | C  | 1.3934148  | -1.5971544 | -0.7619099 |
| 23 | C  | 1.7054496  | -3.880798  | -1.1254713 |
| 24 | N  | 2.9564317  | -3.272832  | -1.0276531 |
| 25 | C  | 2.8668634  | -1.8974468 | -0.8098648 |
| 26 | C  | -2.8692949 | -1.894001  | -0.8098499 |
| 27 | N  | -2.9605165 | -3.2692828 | -1.0276448 |
| 28 | C  | -1.7102647 | -3.8787373 | -1.1255139 |
| 29 | O  | -1.5249637 | -5.0515542 | -1.3174886 |
| 30 | O  | -3.8100836 | -1.1508132 | -0.6974153 |
| 31 | O  | 1.5187503  | -5.0533961 | -1.3174216 |
| 32 | O  | 3.8085447  | -1.155392  | -0.6974128 |
| 33 | C  | 1.4222491  | 7.8124177  | 0.7479703  |
| 34 | C  | 0.7213013  | 8.9615589  | 0.9335795  |
| 35 | C  | -0.7106066 | 8.9624341  | 0.9335526  |
| 36 | C  | -1.4129617 | 7.8141541  | 0.7479206  |
| 37 | Si | 5.9047681  | 2.8442405  | -0.0704578 |
| 38 | C  | 6.6971316  | 4.3861897  | 0.6541734  |
| 39 | C  | 6.4149759  | 2.6210327  | -1.8646186 |
| 40 | C  | 6.3408445  | 1.3235056  | 0.9375142  |
| 41 | Si | -5.9015054 | 2.8512281  | -0.0707553 |
| 42 | C  | -6.4120296 | 2.6302149  | -1.865096  |
| 43 | C  | -6.692041  | 4.3934669  | 0.6552654  |
| 44 | C  | -6.3393008 | 1.3301761  | 0.9359901  |
| 45 | C  | 8.4295344  | -7.1042885 | 2.5879482  |
| 46 | C  | 7.9026046  | -6.570989  | 1.2571398  |
| 47 | C  | 6.5804455  | -5.8148604 | 1.3906705  |
| 48 | C  | 6.0467309  | -5.2773959 | 0.0626114  |
| 49 | C  | 4.7251759  | -4.5227671 | 0.2040168  |
| 50 | C  | 4.2162158  | -3.9963504 | -1.1381677 |
| 51 | C  | -8.4368692 | -7.0954426 | 2.5885787  |
| 52 | C  | -7.9097677 | -6.5623967 | 1.2577368  |
| 53 | C  | -6.5868127 | -5.8076257 | 1.3910667  |
| 54 | C  | -6.05287   | -5.2704827 | 0.06297    |
| 55 | C  | -4.7305011 | -4.5172468 | 0.2042003  |
| 56 | C  | -4.2211432 | -3.9913495 | -1.1380382 |

## COMMUNICATION

|     |   |            |            |            |
|-----|---|------------|------------|------------|
| 57  | H | 2.5037792  | 7.7886023  | 0.7445174  |
| 58  | H | 1.2445764  | 9.8971508  | 1.0849438  |
| 59  | H | -1.2327432 | 9.8986648  | 1.0849003  |
| 60  | H | -2.4945198 | 7.7916696  | 0.7444344  |
| 61  | H | 6.3817373  | 4.5425556  | 1.6878406  |
| 62  | H | 7.7870783  | 4.3027491  | 0.6444102  |
| 63  | H | 6.4228527  | 5.2755699  | 0.0830519  |
| 64  | H | 5.9368147  | 1.7392451  | -2.2951846 |
| 65  | H | 7.4977585  | 2.4923409  | -1.9440321 |
| 66  | H | 6.1334389  | 3.4864395  | -2.4678999 |
| 67  | H | 6.0510858  | 1.4471003  | 1.9831387  |
| 68  | H | 5.8229606  | 0.4460072  | 0.5455014  |
| 69  | H | 7.4169892  | 1.1328193  | 0.9063405  |
| 70  | H | -5.9349835 | 1.7482253  | -2.2964816 |
| 71  | H | -7.4949738 | 2.5029473  | -1.944585  |
| 72  | H | -6.1294357 | 3.4958174  | -2.4676037 |
| 73  | H | -6.376324  | 4.5485753  | 1.689023   |
| 74  | H | -7.7820842 | 4.3113017  | 0.645575   |
| 75  | H | -6.4168091 | 5.2830229  | 0.0848741  |
| 76  | H | -5.8220244 | 0.4524715  | 0.5436393  |
| 77  | H | -6.0498748 | 1.4528802  | 1.9818134  |
| 78  | H | -7.4156003 | 1.140449   | 0.9042564  |
| 79  | H | 9.3729626  | -7.6381367 | 2.4579952  |
| 80  | H | 8.6032279  | -6.2918937 | 3.2981011  |
| 81  | H | 7.7177104  | -7.7955863 | 3.0460103  |
| 82  | H | 7.7723261  | -7.4028608 | 0.5568423  |
| 83  | H | 8.6511837  | -5.9103674 | 0.806908   |
| 84  | H | 6.710242   | -4.9823123 | 2.0915596  |
| 85  | H | 5.8307662  | -6.4757961 | 1.8404095  |
| 86  | H | 5.915708   | -6.1103206 | -0.6373836 |
| 87  | H | 6.7963071  | -4.6158471 | -0.3863986 |
| 88  | H | 4.8508783  | -3.6810112 | 0.8910851  |
| 89  | H | 3.9670985  | -5.1816667 | 0.6369153  |
| 90  | H | 4.0505593  | -4.8208682 | -1.8322867 |
| 91  | H | 4.940052   | -3.3094516 | -1.5777394 |
| 92  | H | -9.3808651 | -7.6283216 | 2.4587728  |
| 93  | H | -7.7256104 | -7.7875461 | 3.0463029  |
| 94  | H | -8.6095555 | -6.2830212 | 3.2989466  |
| 95  | H | -8.6578052 | -5.9009313 | 0.8078443  |
| 96  | H | -7.7805117 | -7.3942538 | 0.5572322  |
| 97  | H | -5.8376925 | -6.4693996 | 1.8405054  |
| 98  | H | -6.715589  | -4.9750685 | 2.0921329  |
| 99  | H | -6.8018686 | -4.6080868 | -0.3857537 |
| 100 | H | -5.9228662 | -6.1034262 | -0.6371934 |
| 101 | H | -3.9730638 | -5.1769714 | 0.6369656  |

## COMMUNICATION

|     |   |            |            |            |
|-----|---|------------|------------|------------|
| 102 | H | -4.8552053 | -3.6753871 | 0.8913217  |
| 103 | H | -4.9442544 | -3.3036291 | -1.577517  |
| 104 | H | -4.0564956 | -4.816048  | -1.8321826 |

## 6) FMO Distribution

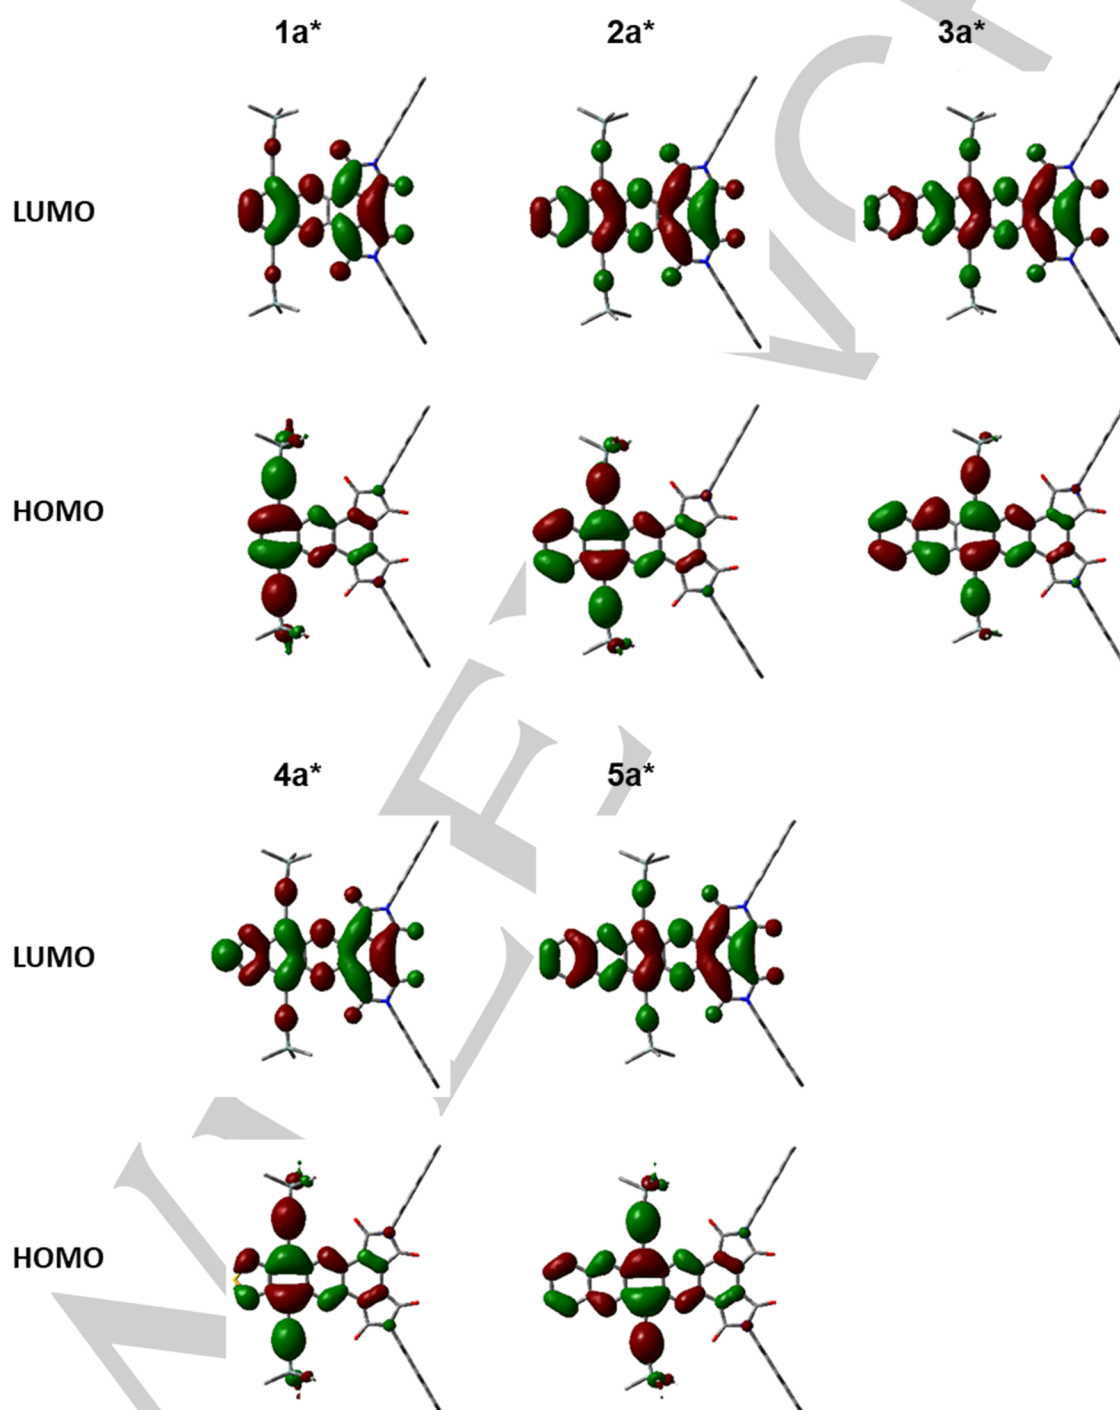

**Figure S6.** Distribution of FMOs of TMS-substituted model compounds calculated using Gaussian16 B3LYP/def2SVP//Gaussian16 B3LYP/def2TZVP, TIPS-substituents were replaced with TMS groups.

## 7) NICS(1)zz calculations

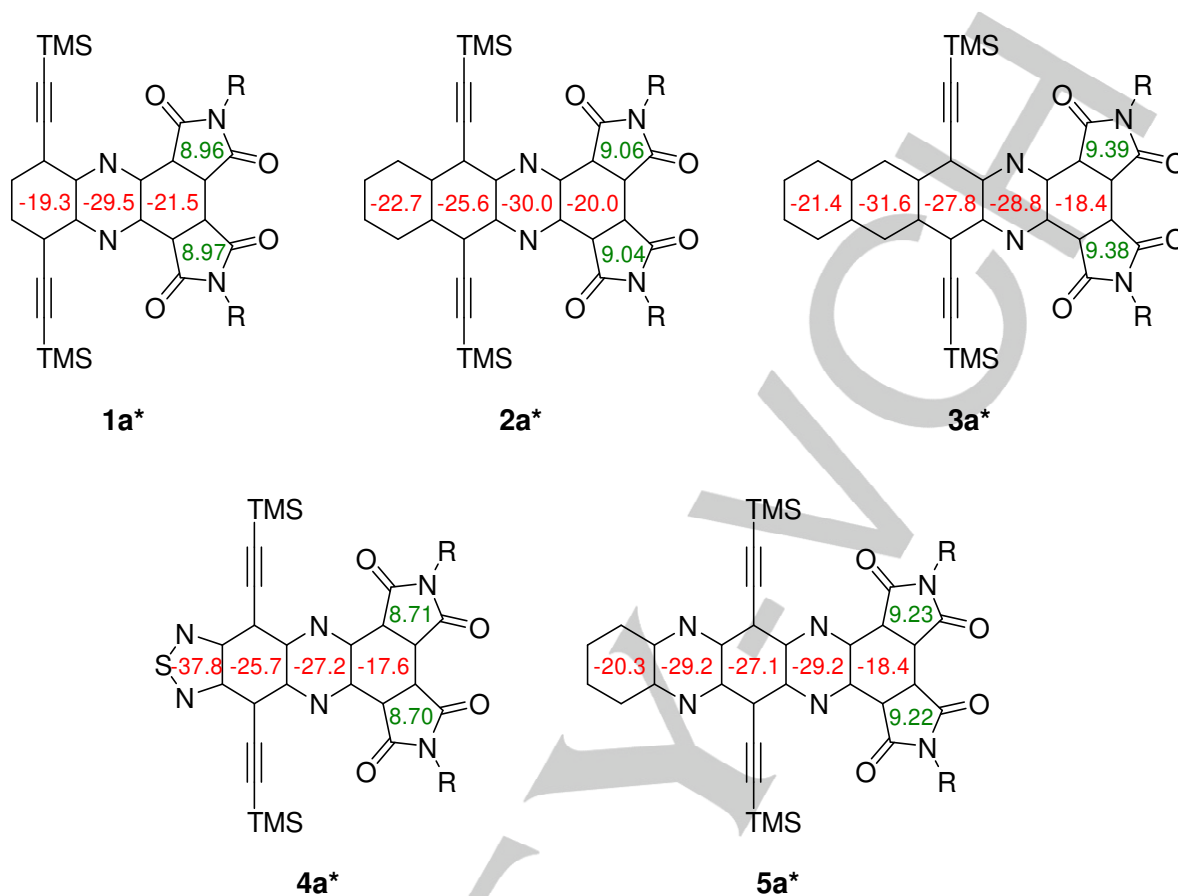

**Figure S7.** NICS(1)zz values calculated using Gaussian16 B3LYP/def2SVP//Gaussian16 B3LYP/def2TZVP, TIPS-substituents were replaced with TMS groups. Cartesian axes were adjusted from the geometry optimization reported in chapter 5) with Avogadro 1.2.0 to orient the Z-axis perpendicular to the acene XY-plane.

## 8) AICD Calculations

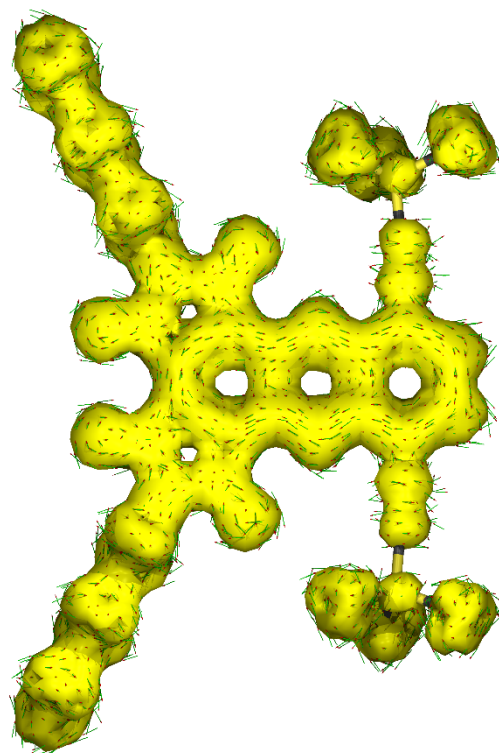

Figure S8: AICD plot for 1a.

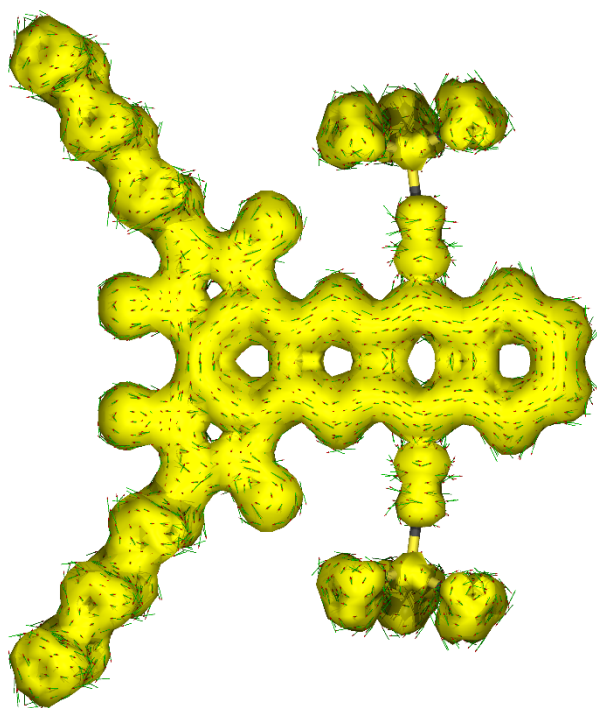

Figure S9: AICD plot for 2a.

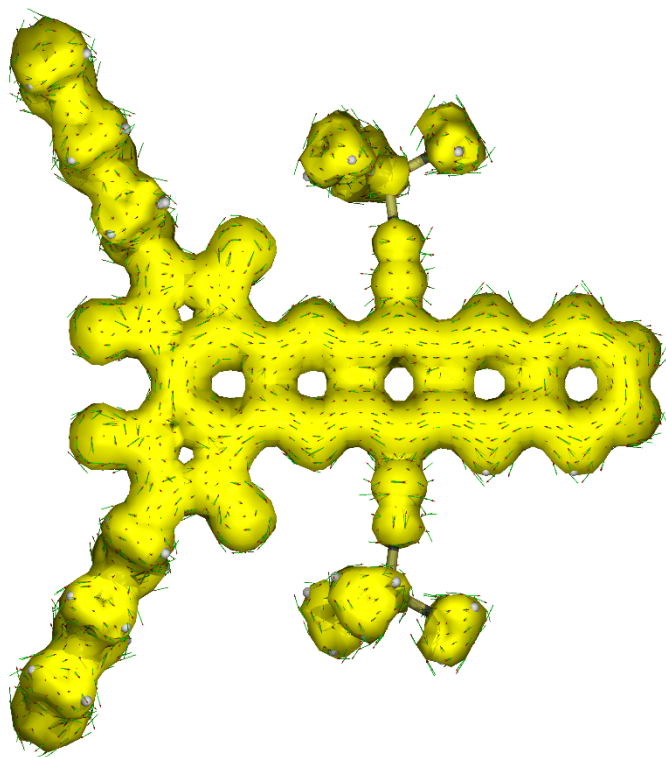

Figure S10: AICD plot for 3a.

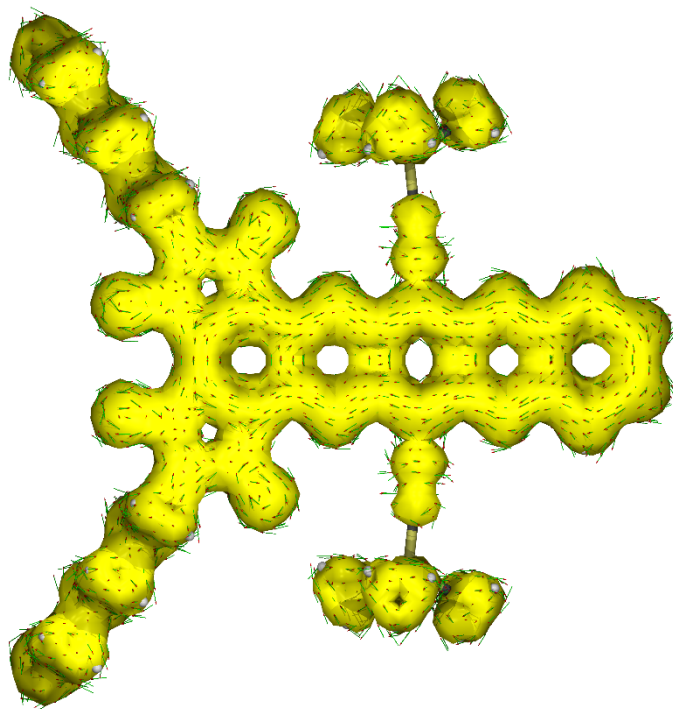

Figure S11: AICD plot for 4a.

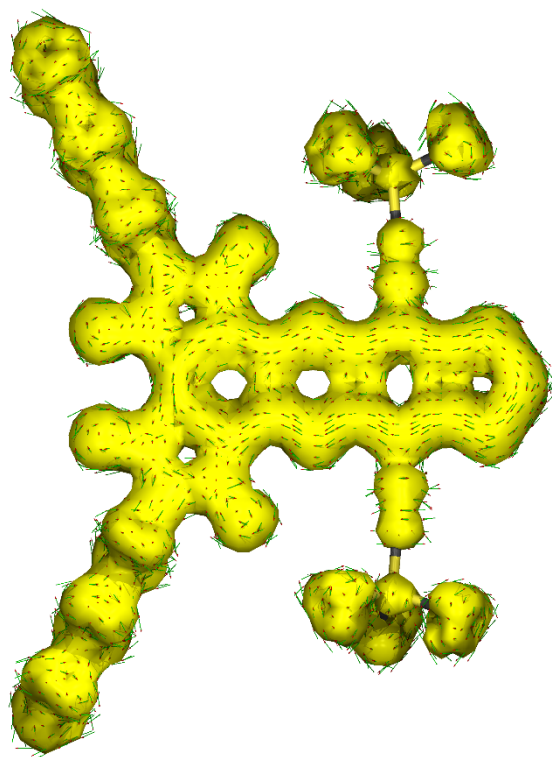

Figure S12: AICD plot for 5a.

WILEY

## 9) NMR Spectroscopy

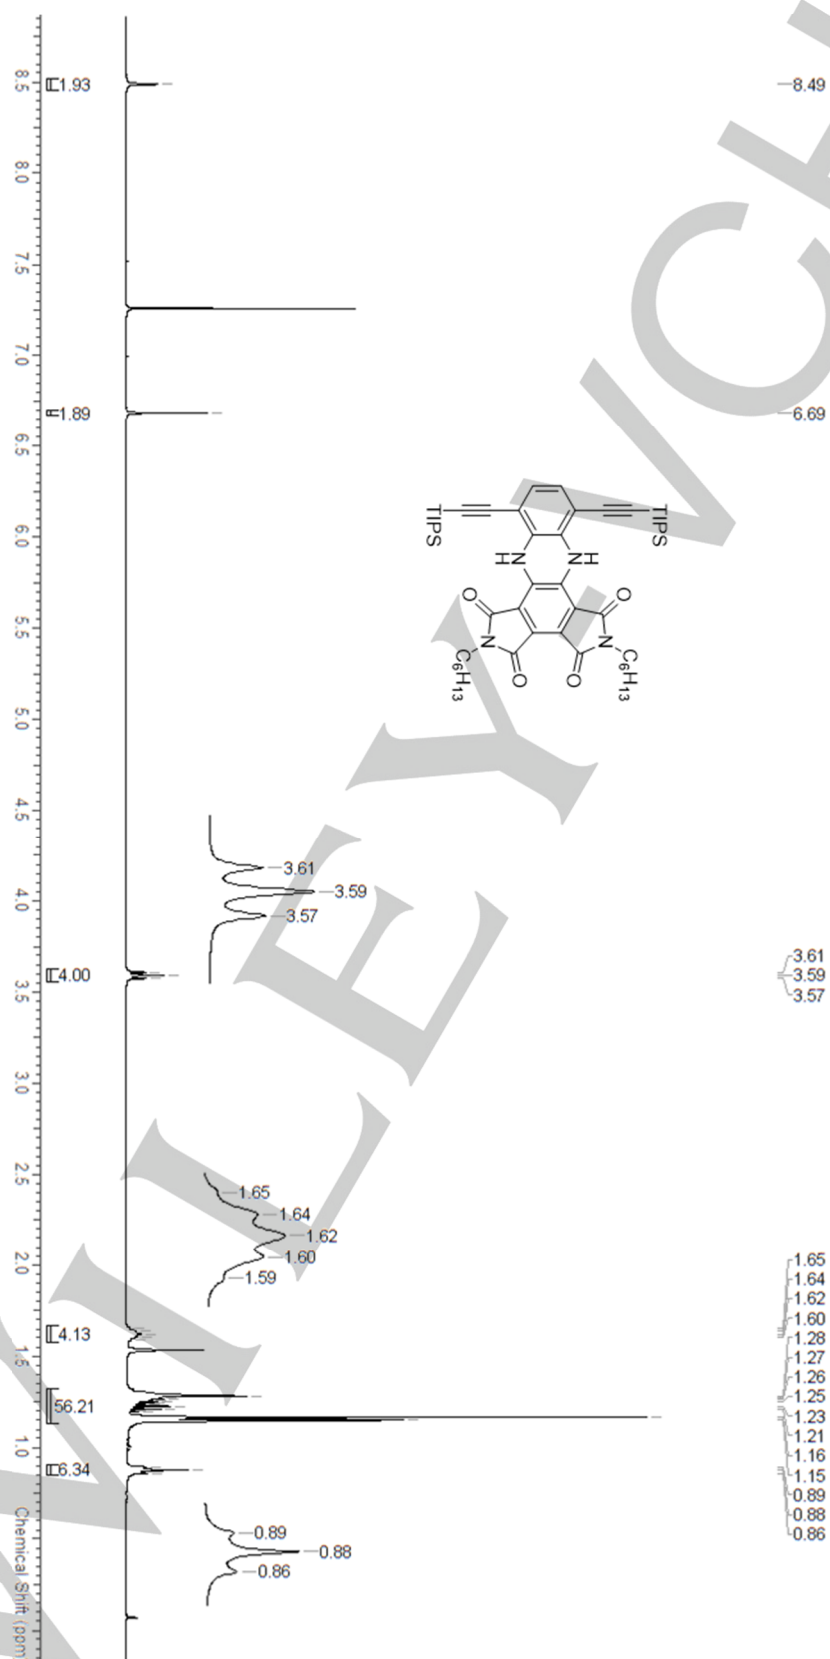

Figure S13.  $^1\text{H}$  NMR spectrum (400.3 MHz,  $\text{CDCl}_3$ , 295 K) of **1-H<sub>2</sub>**.



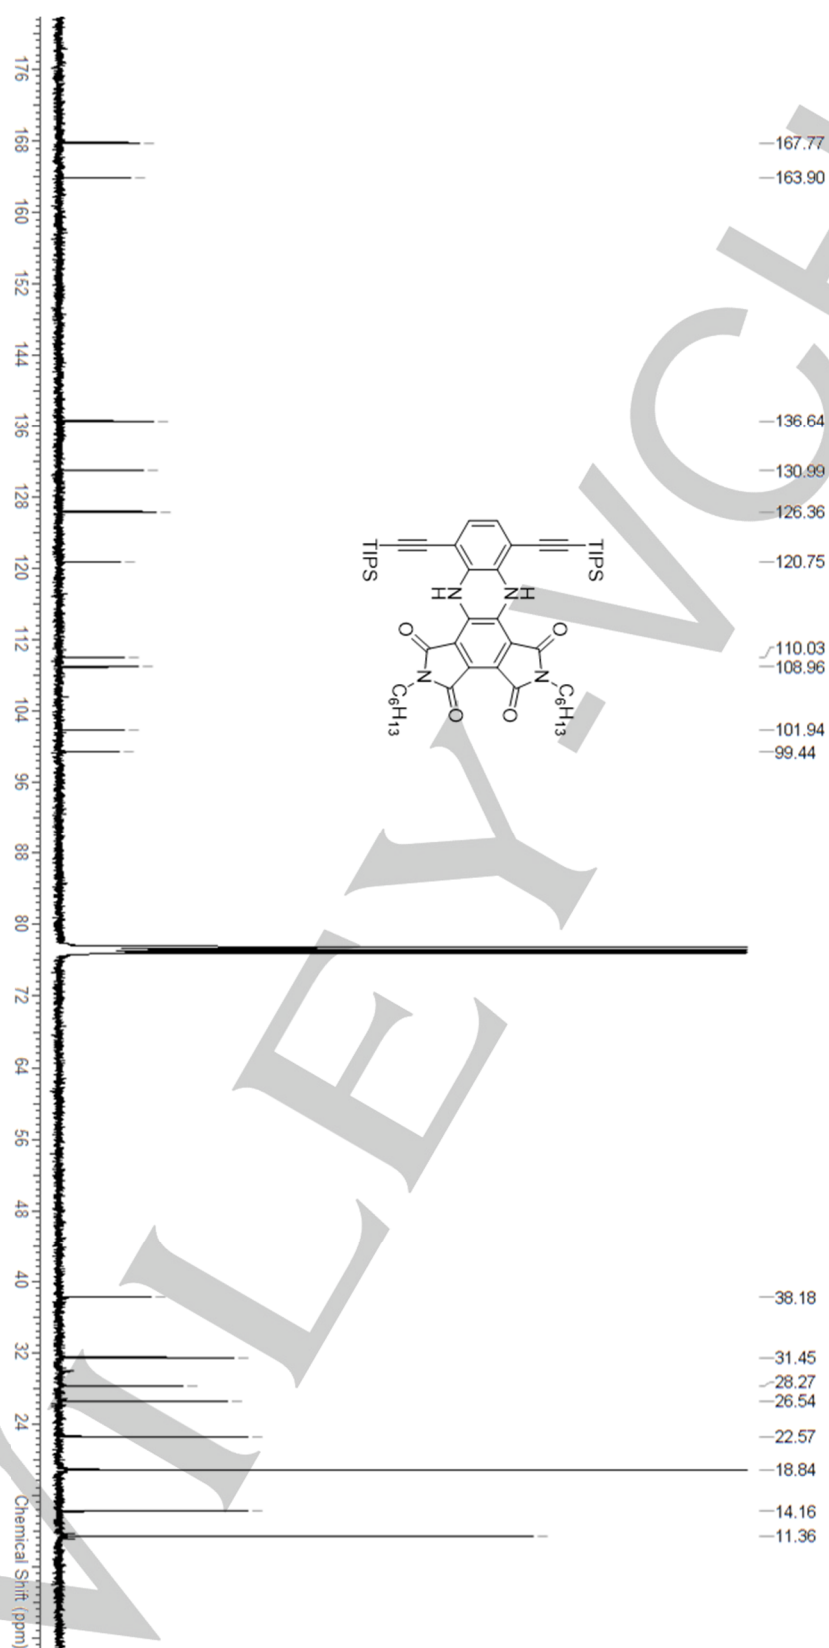

**Figure S14.**  $^{13}\text{C}$  NMR spectrum (100.7 MHz,  $\text{CDCl}_3$ , 295 K) of **1-H<sub>2</sub>**.

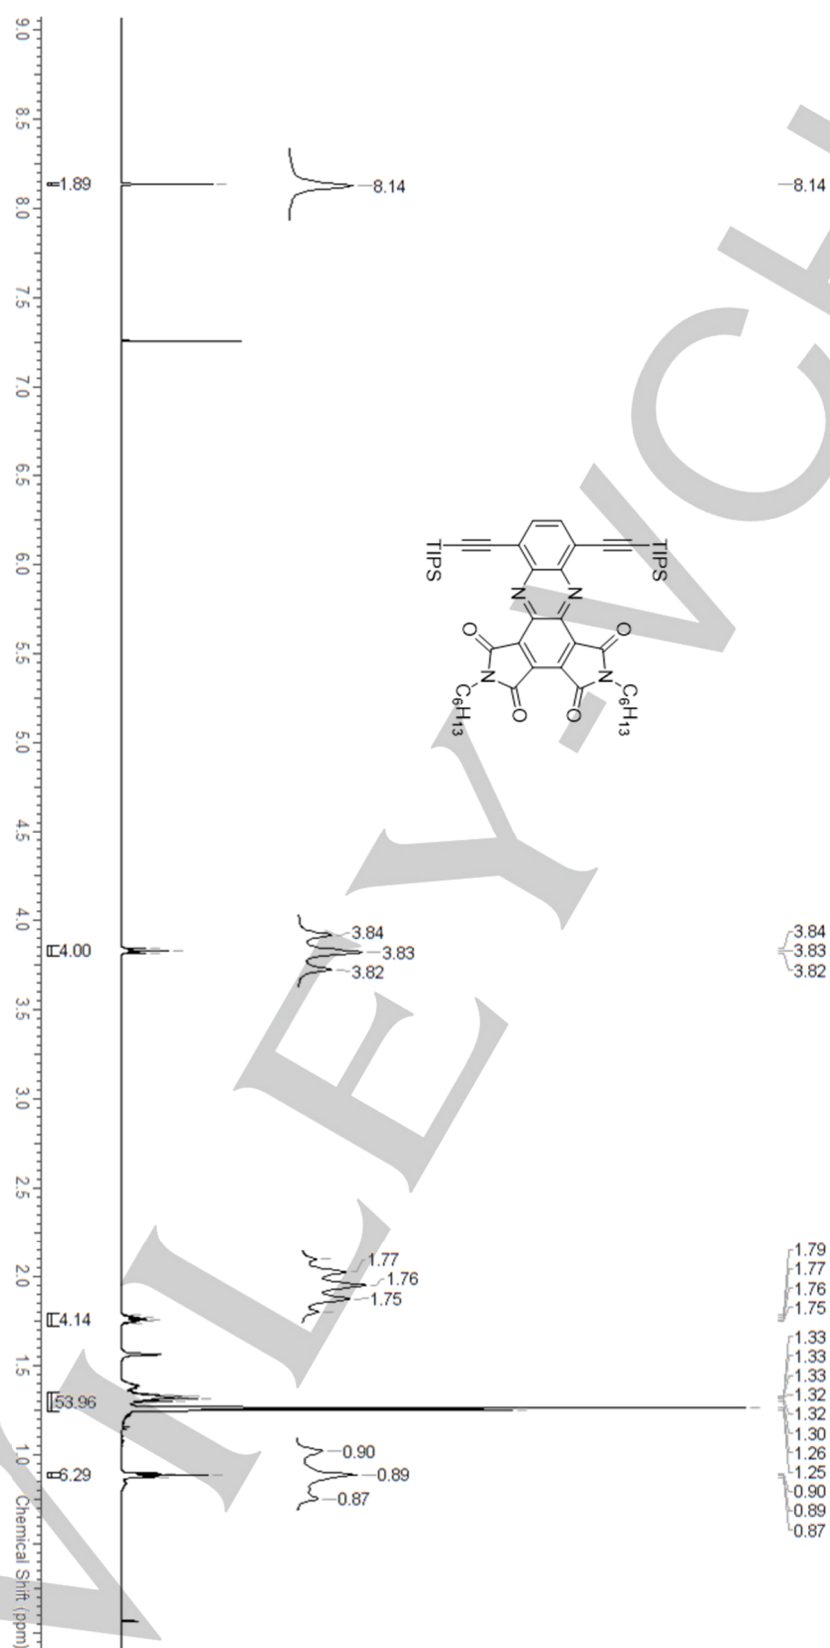

Figure S15.  $^1\text{H}$  NMR spectrum (600.2 MHz,  $\text{CDCl}_3$ , 295 K) of **1a**.

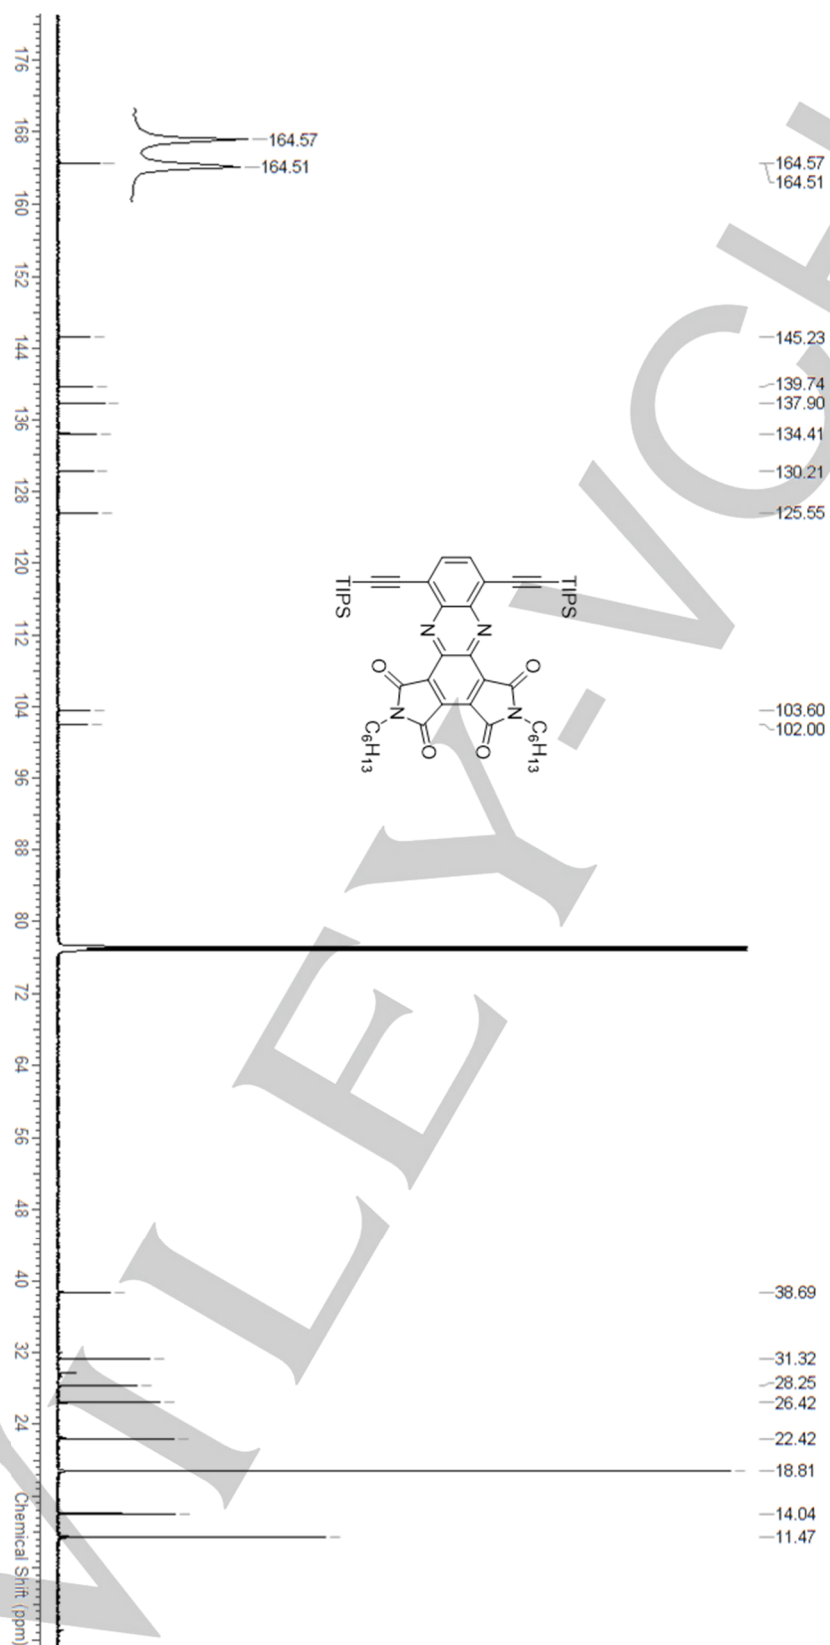

**Figure S16.**  $^{13}C$  NMR spectrum (150.9 MHz,  $CDCl_3$ , 295 K) of **1a**.

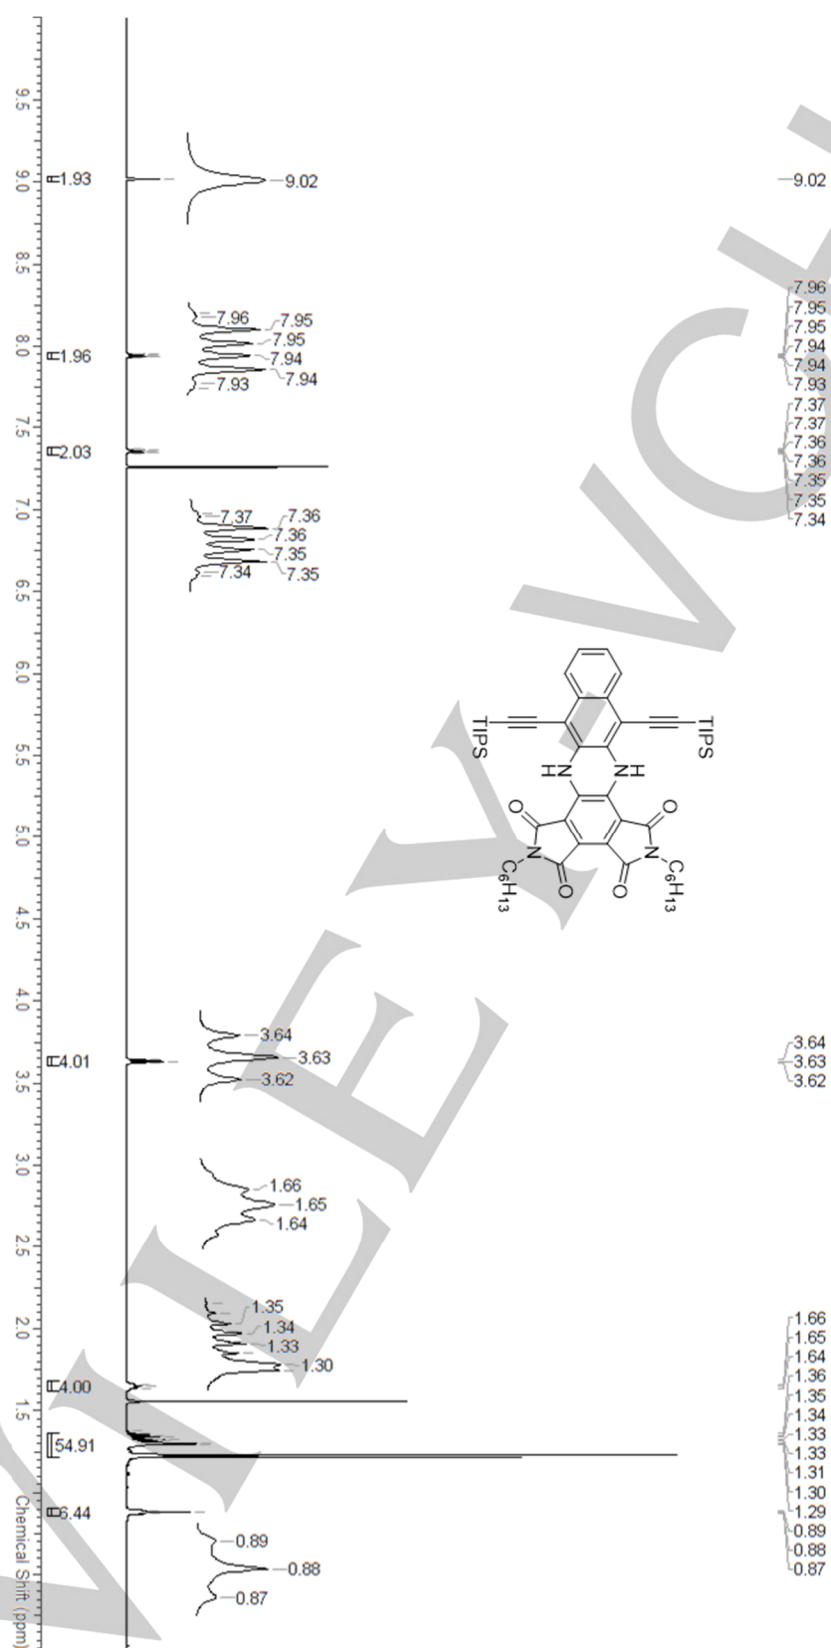

Figure S17  $^1\text{H}$  NMR spectrum (600.2 MHz,  $\text{CDCl}_3$ , 295 K) of **2-H<sub>2</sub>**.

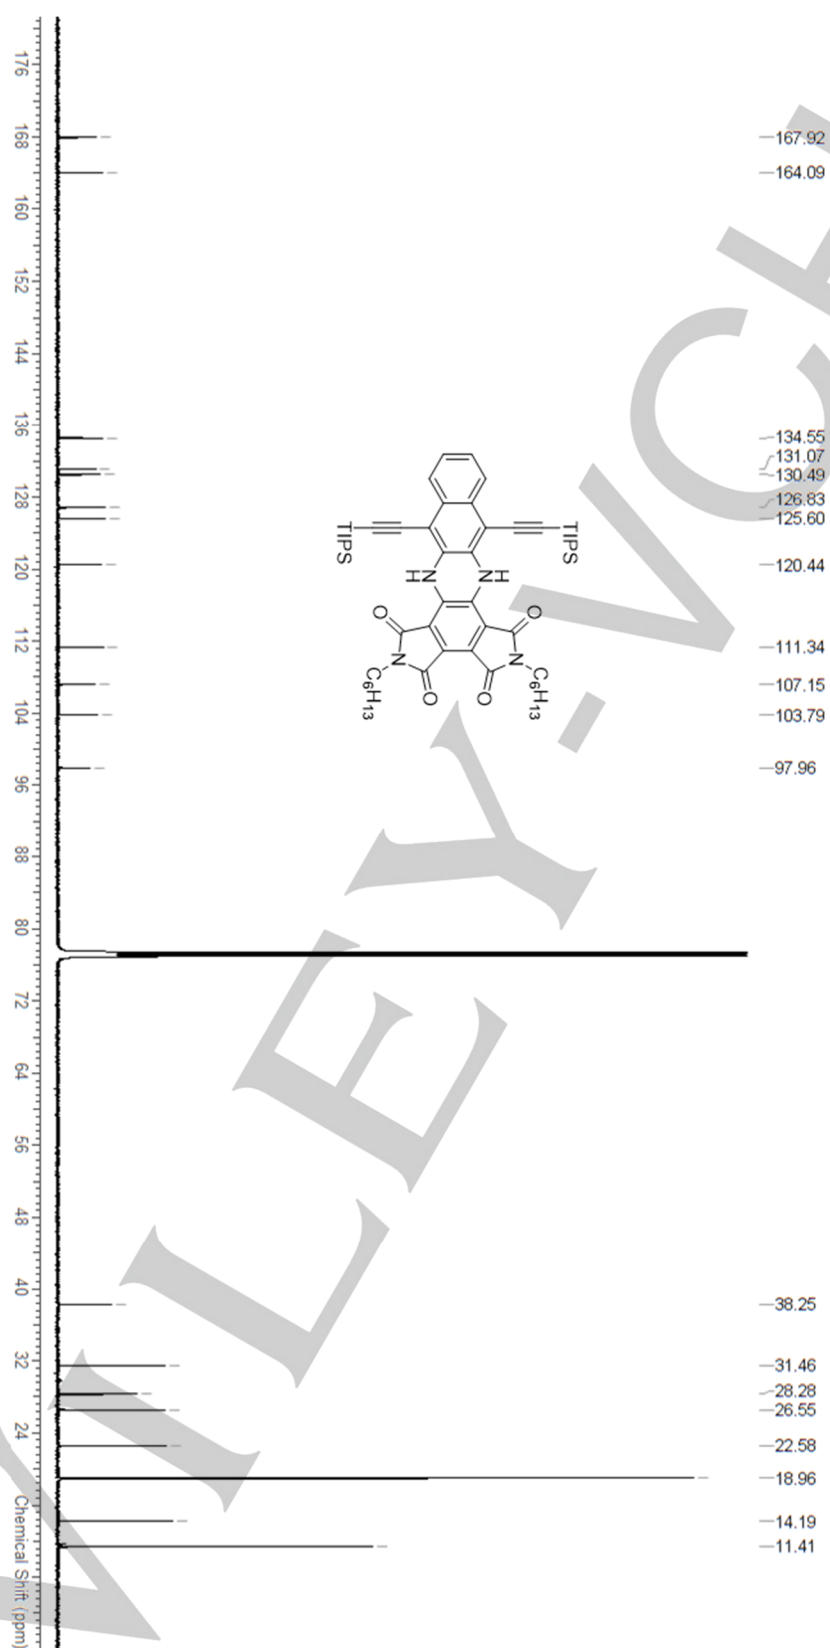

**Figure S18.** <sup>13</sup>C NMR spectrum (150.9 MHz, CDCl<sub>3</sub>, 295 K) of **2-H<sub>2</sub>**.

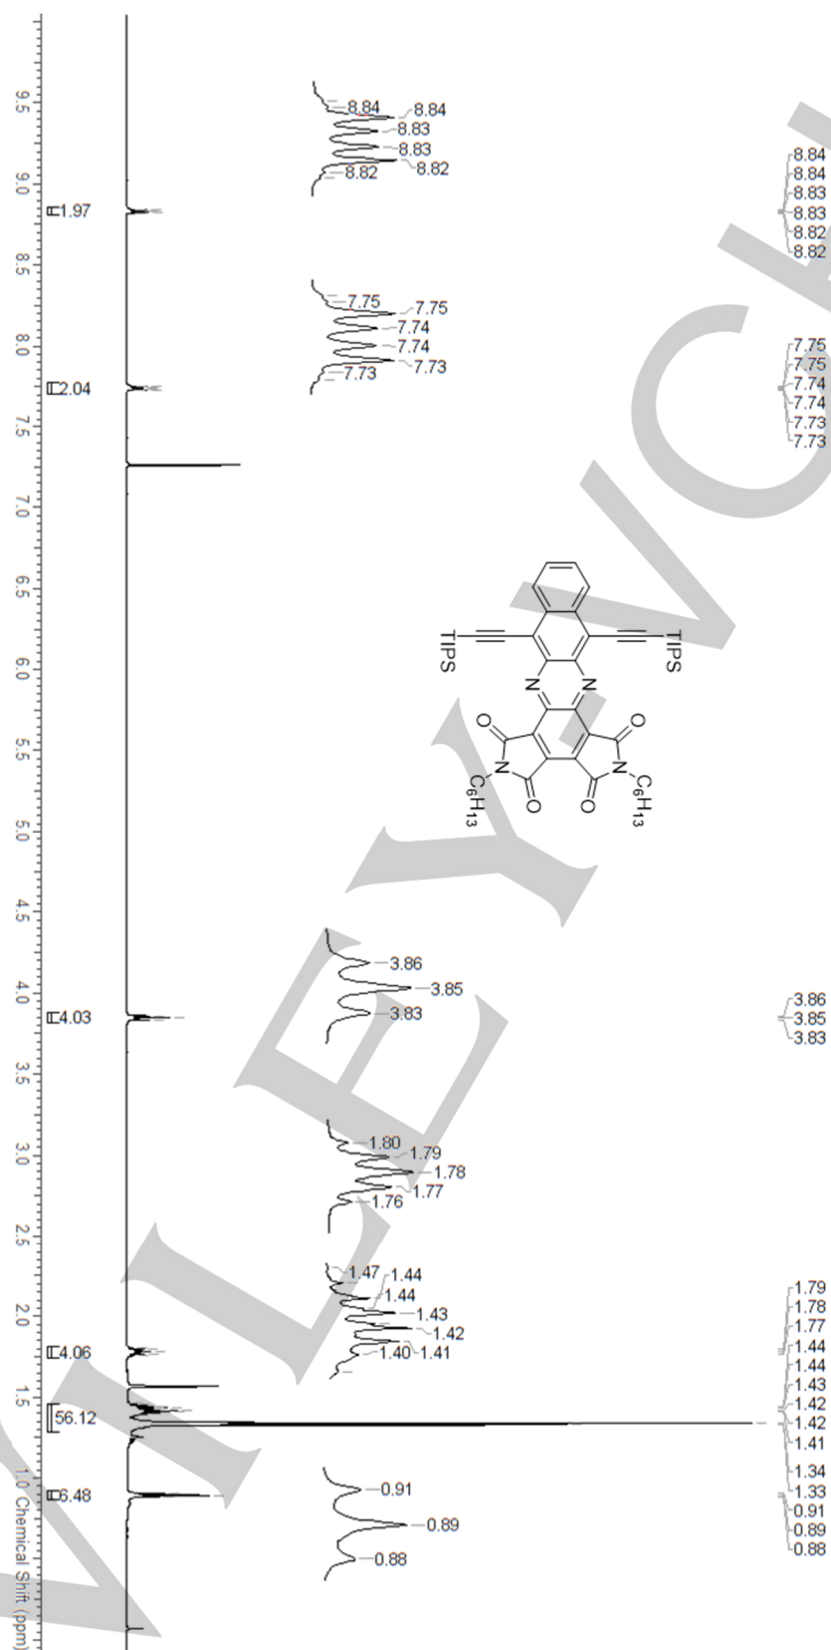

**Figure S19.**  $^1\text{H}$  NMR spectrum (600.2 MHz,  $\text{CDCl}_3$ , 295 K) of **2a**.

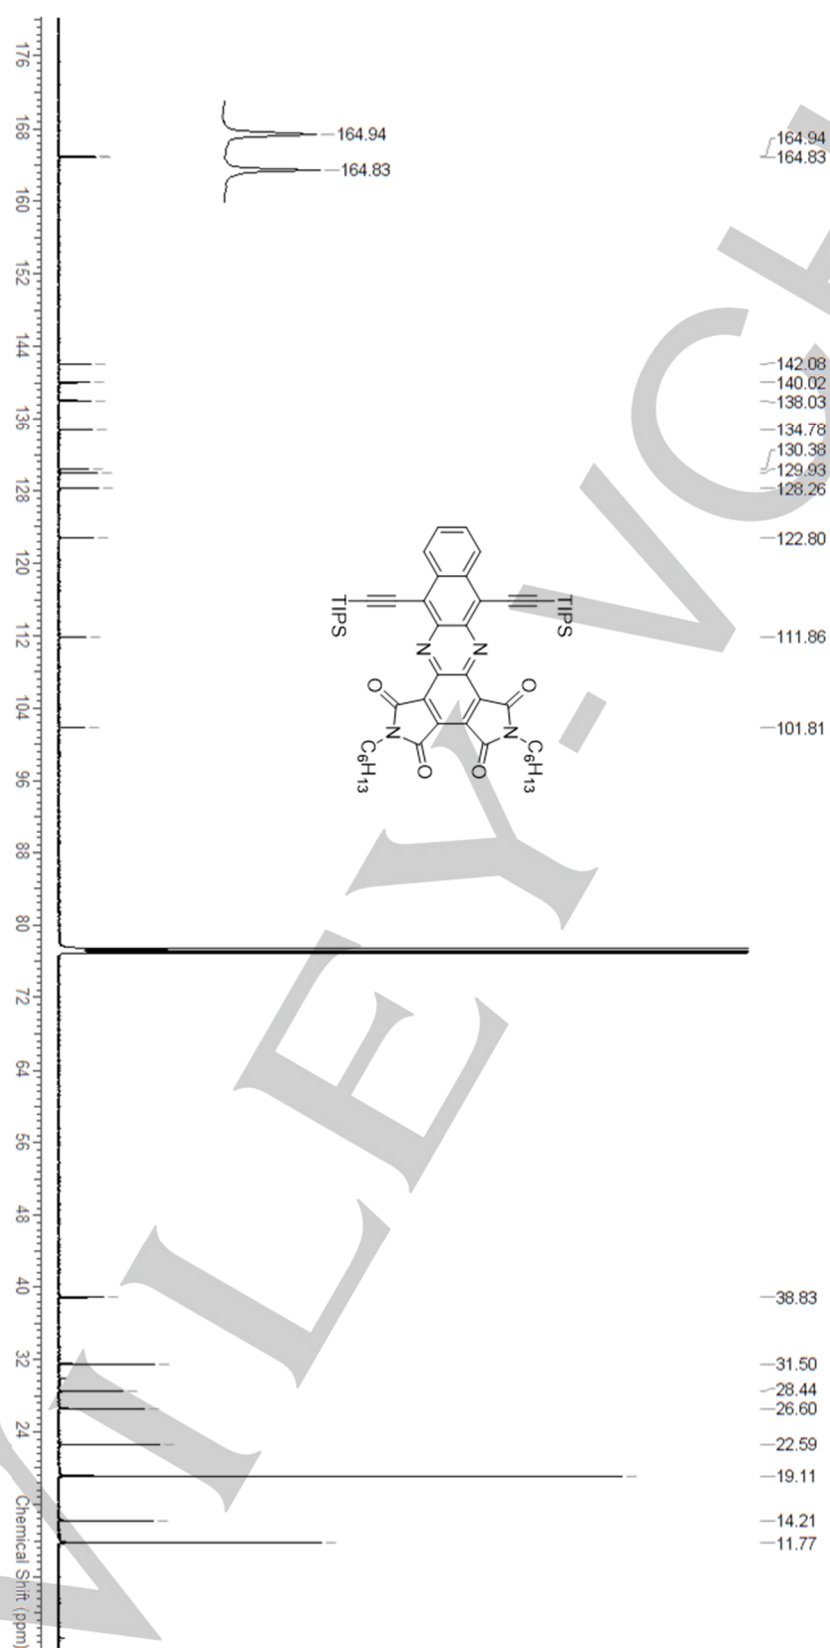

**Figure S3.**  $^{13}C$  NMR spectrum (150.9 MHz,  $CDCl_3$ , 295 K) of **2a**.

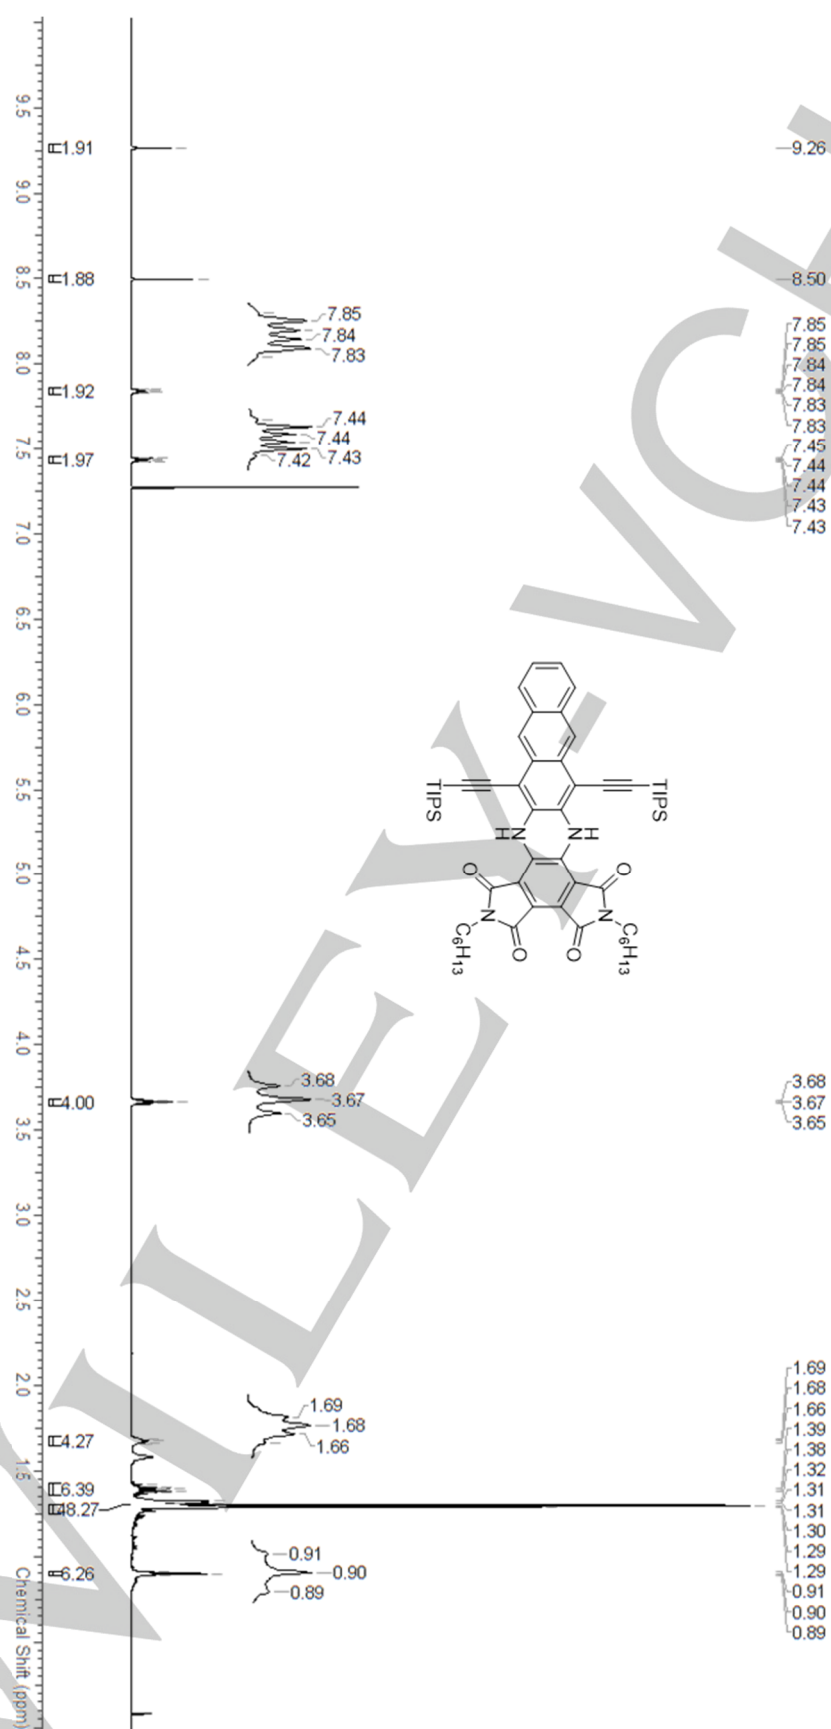

Figure S21. <sup>1</sup>H NMR spectrum (600.2 MHz, CDCl<sub>3</sub>, 295 K) of **3-H<sub>2</sub>**.



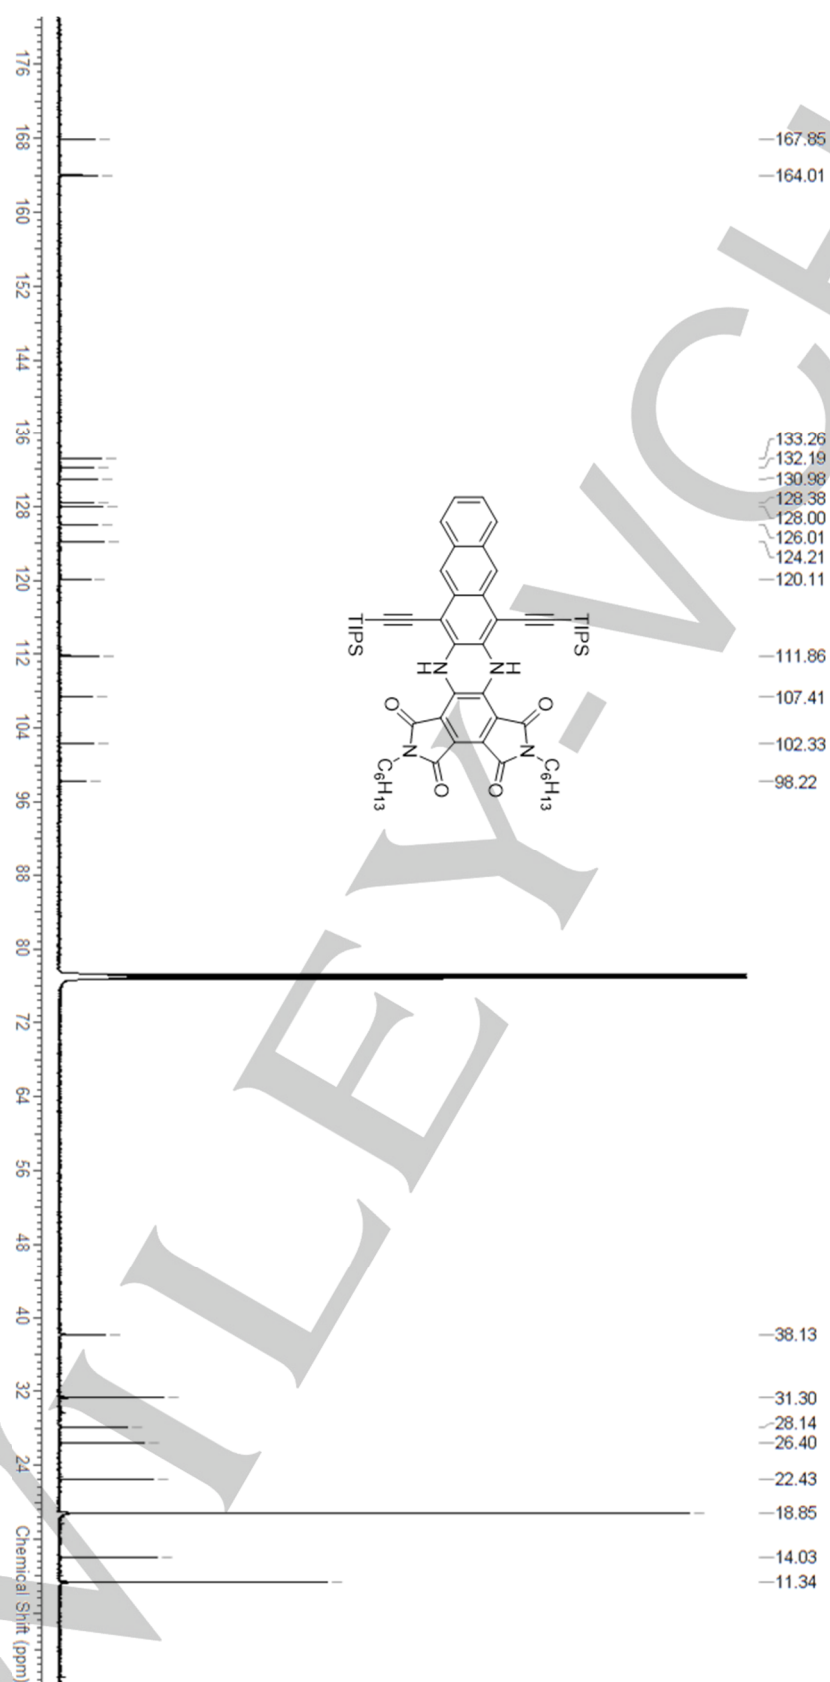

**Figure S422.** <sup>13</sup>C NMR spectrum (150.9 MHz, CDCl<sub>3</sub>, 295 K) of **3-H<sub>2</sub>**.

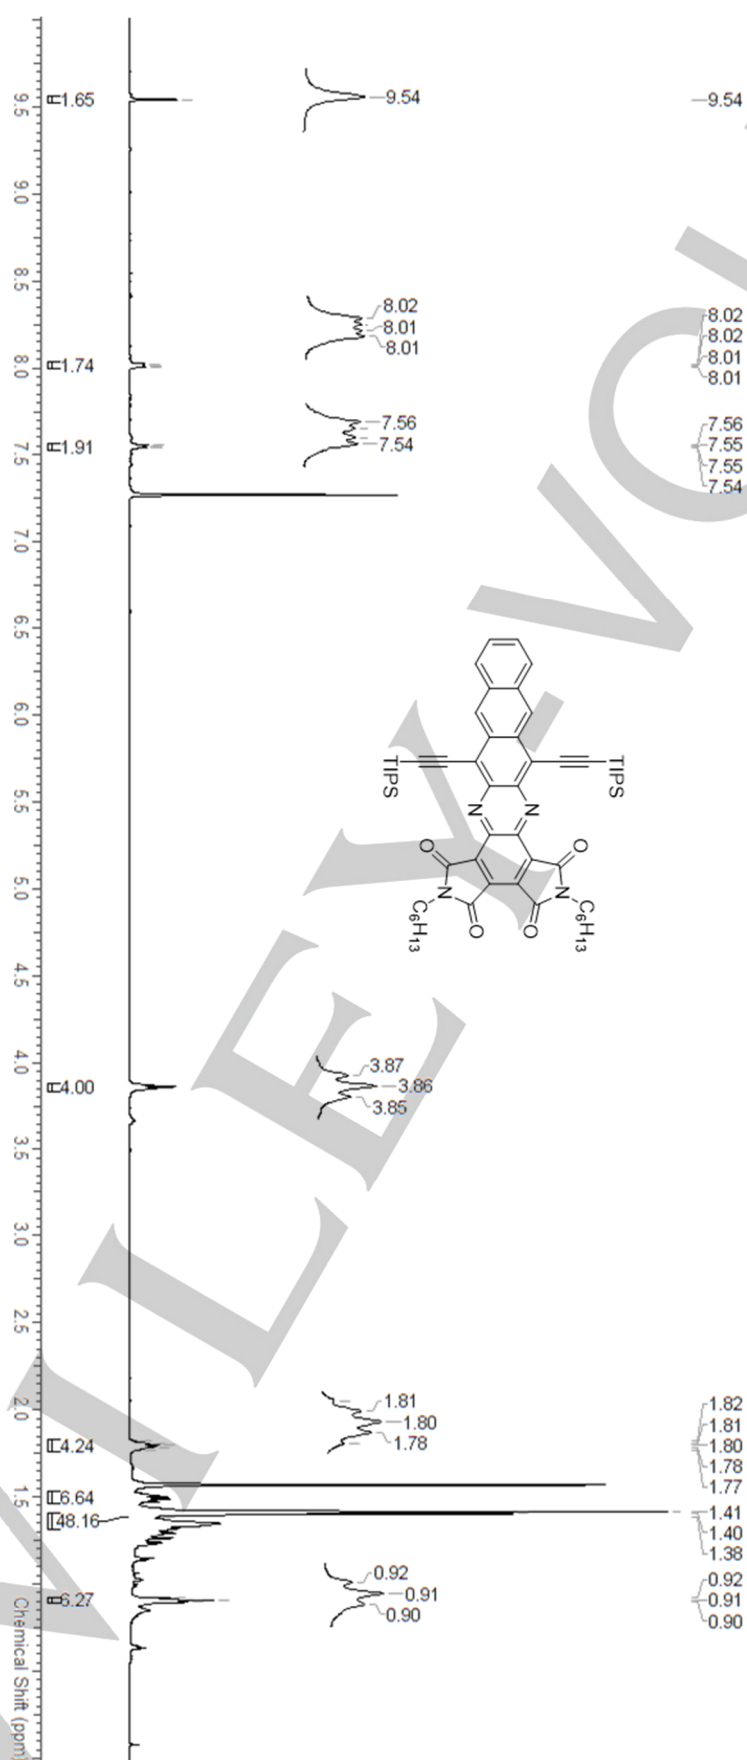

Figure S23.  $^1\text{H}$  NMR spectrum (600.2 MHz,  $\text{CDCl}_3$ , 295 K) of **3a**.

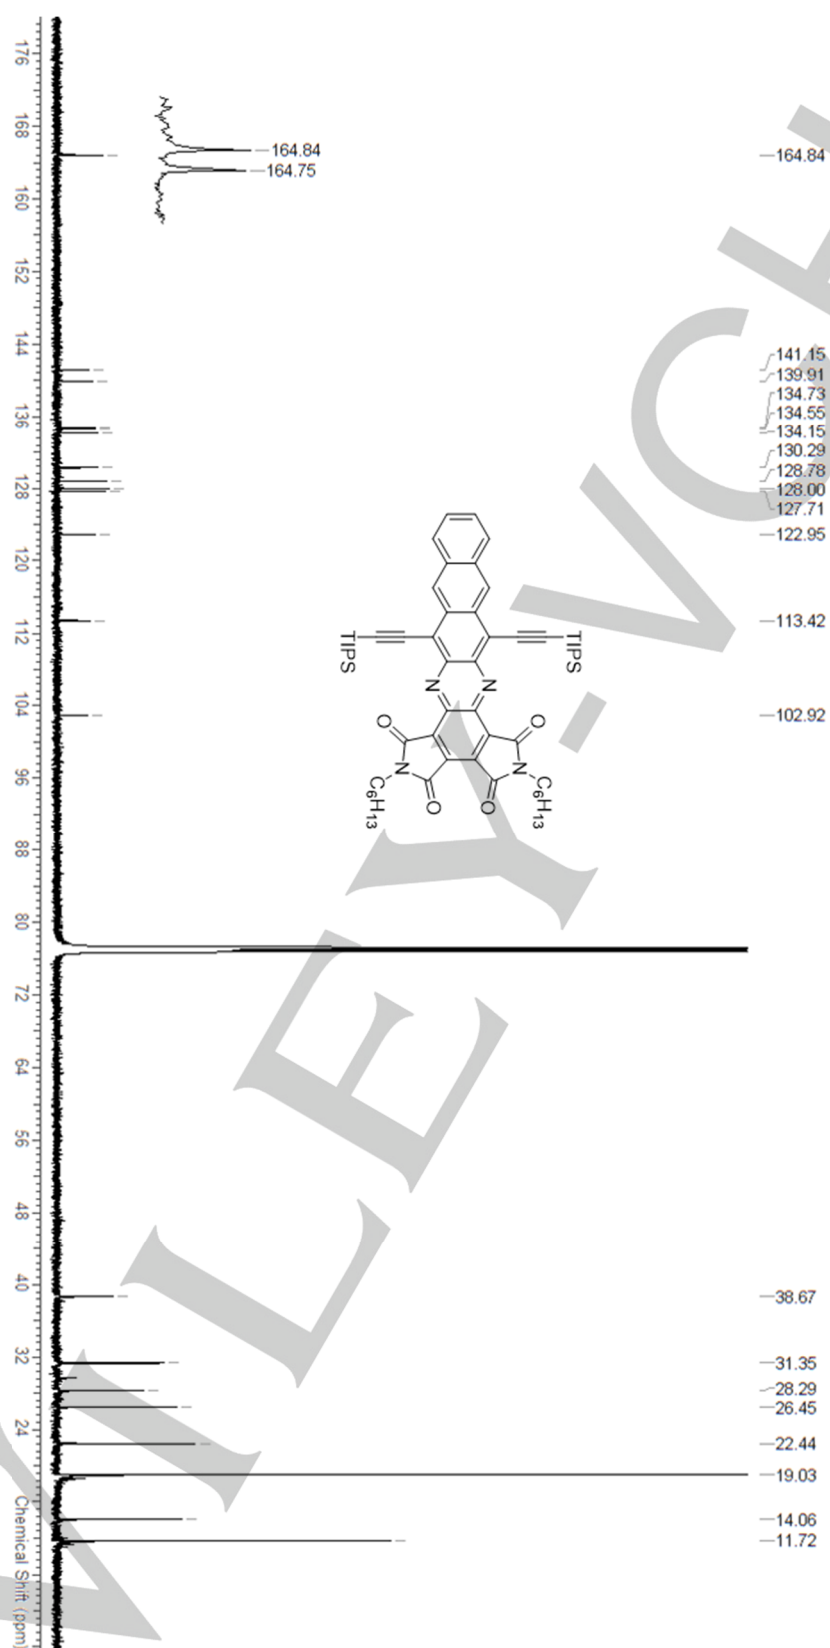

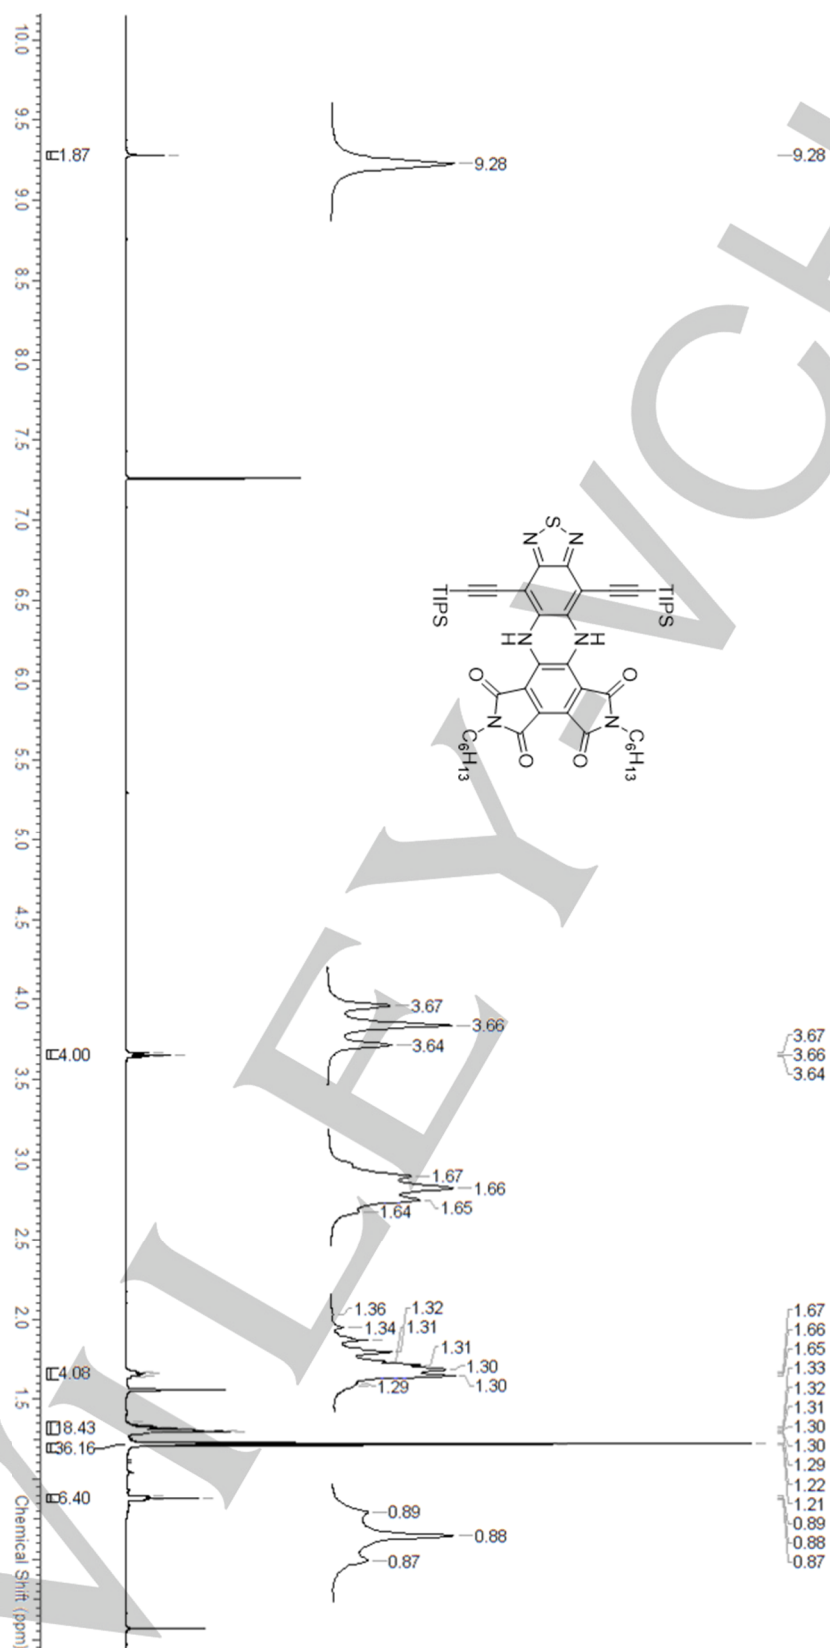

Figure S25.  $^1\text{H}$  NMR spectrum (600.2 MHz,  $\text{CDCl}_3$ , 295 K) of **4-H<sub>2</sub>**.

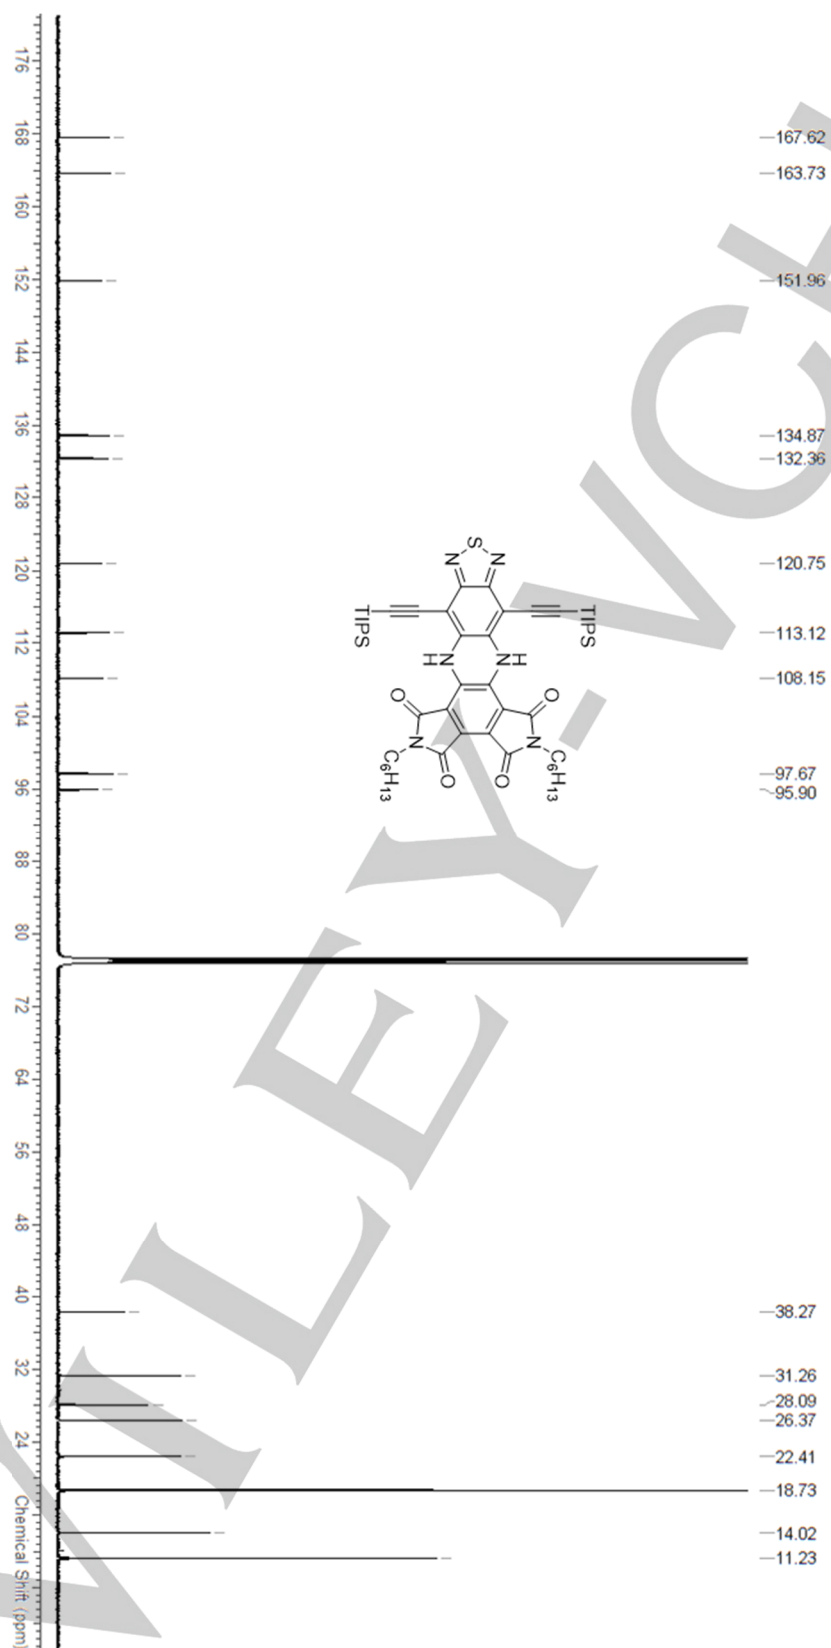

Figure S26. <sup>13</sup>C NMR spectrum (150.9 MHz, CDCl<sub>3</sub>, 295 K) of 4-H<sub>2</sub>.

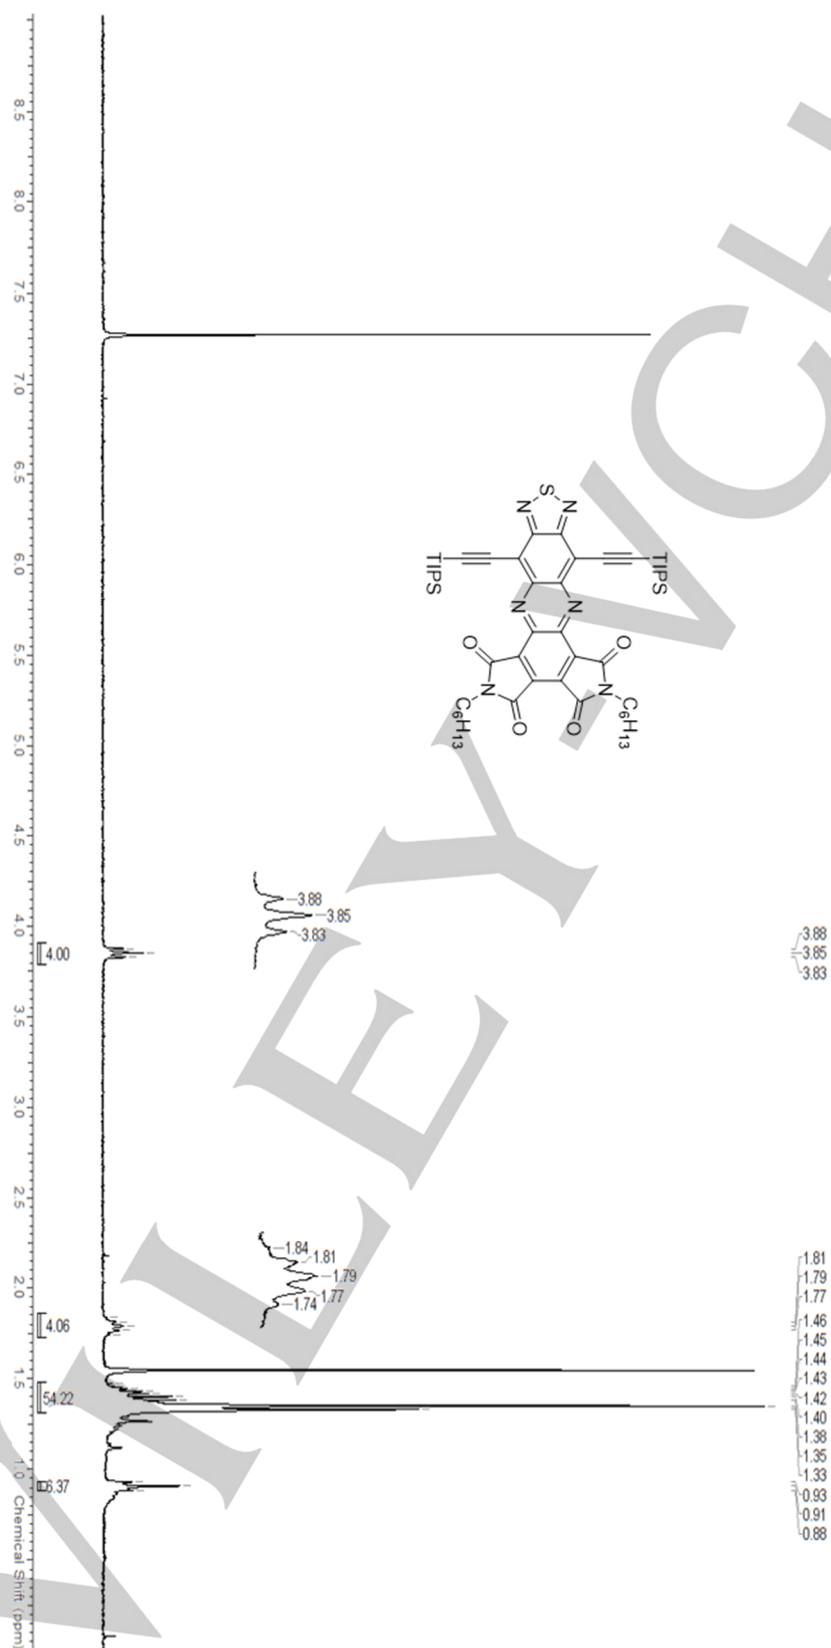

Figure S27.  $^1\text{H}$  NMR spectrum (300.5 MHz,  $\text{CDCl}_3$ , 295 K) of **4a**.

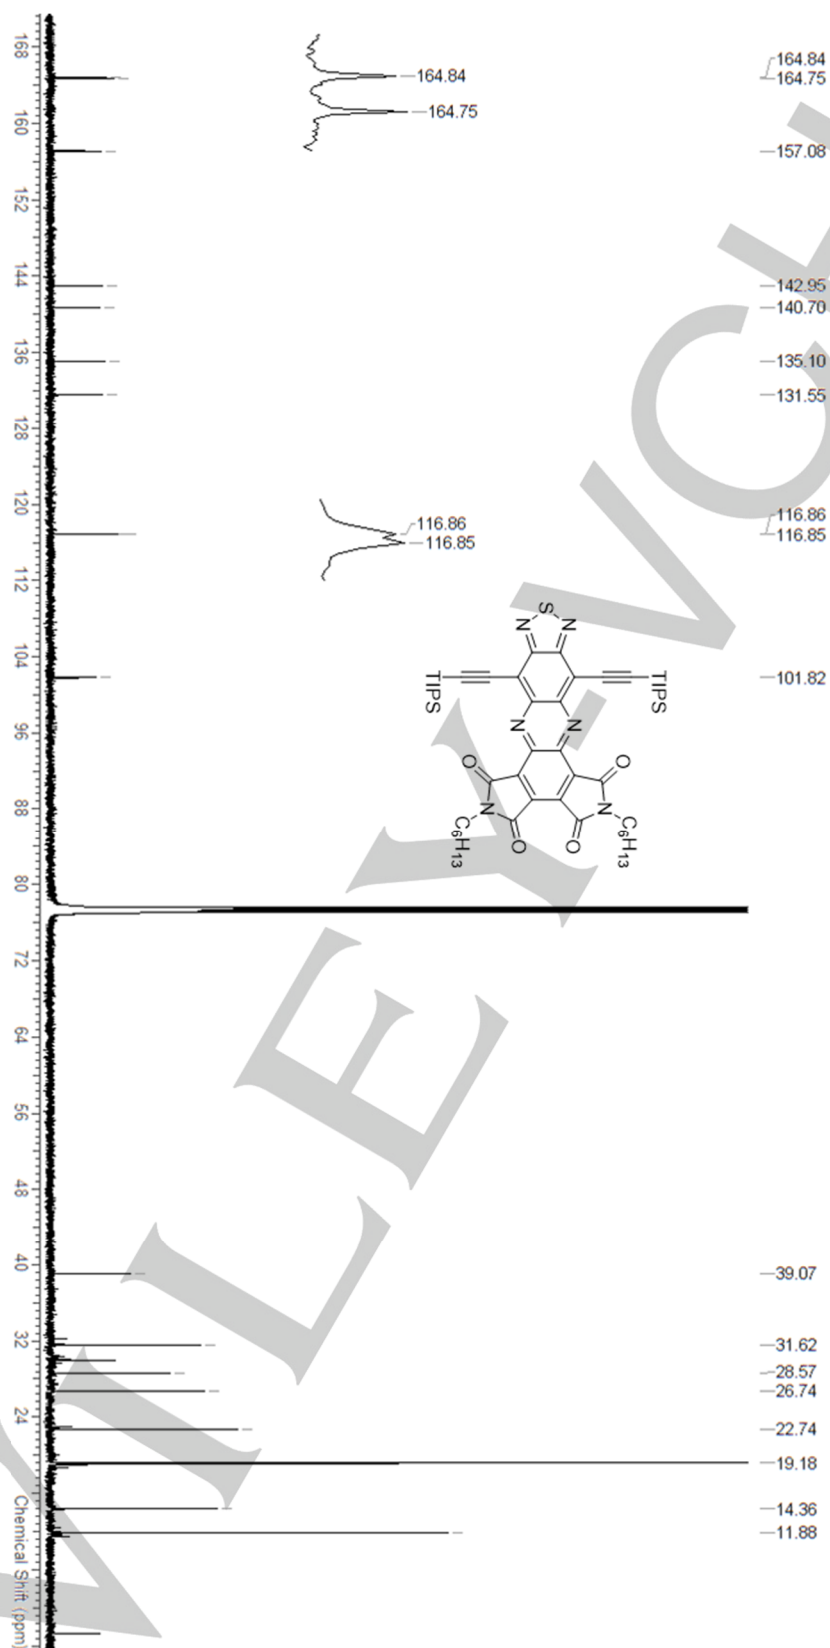

**Figure S28.**  $^{13}\text{C}$  NMR spectrum (150.9 MHz,  $\text{CDCl}_3$ , 295 K) of **4a**.

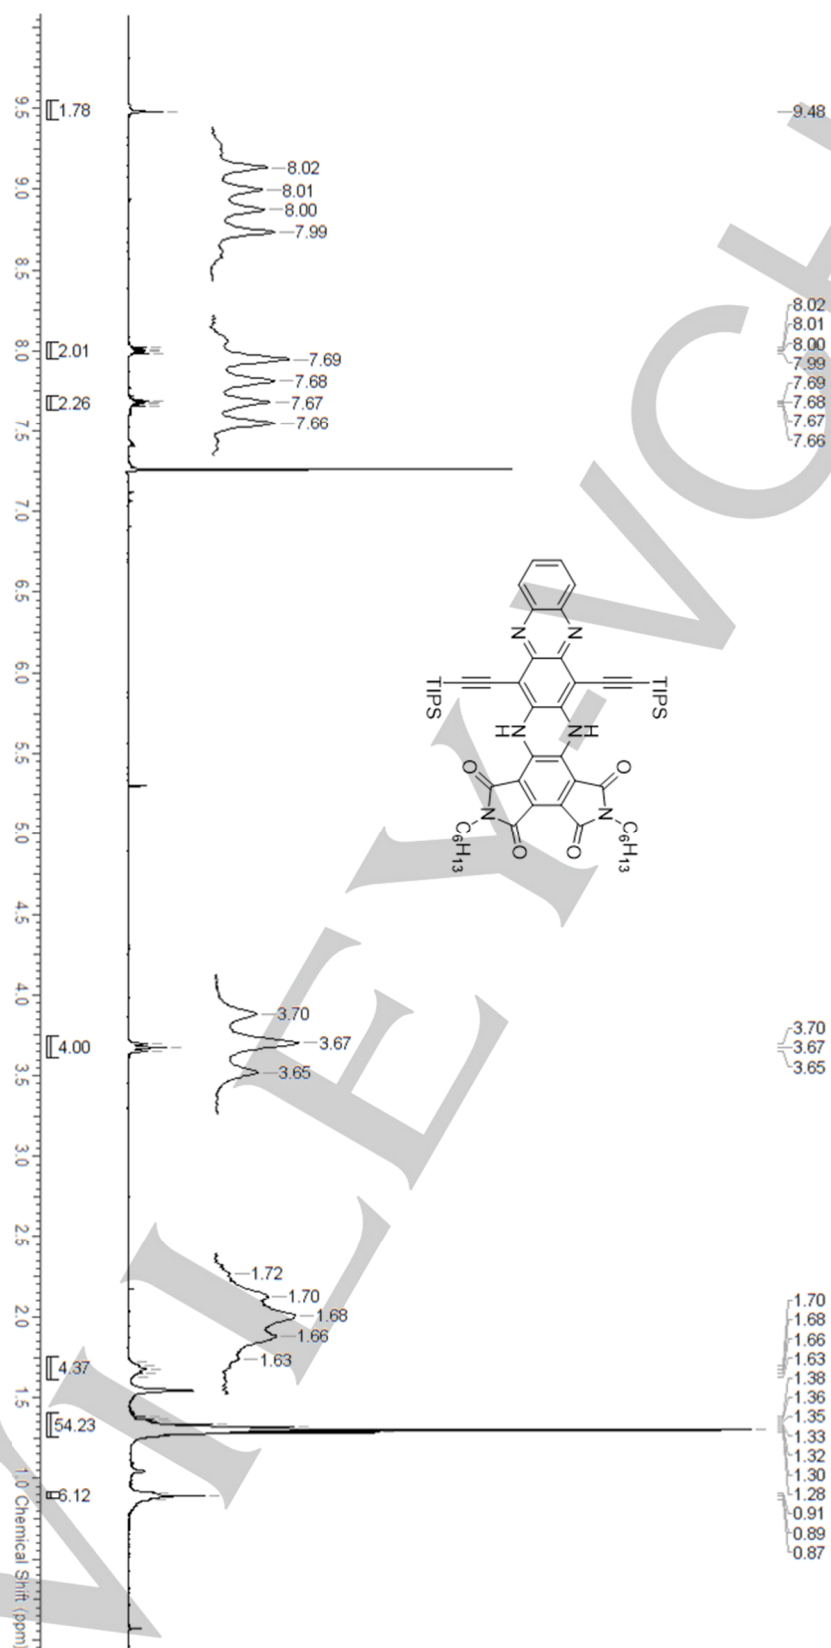

**Figure S29.**  $^1\text{H}$  NMR spectrum (300.5 MHz,  $\text{CDCl}_3$ , 300 K) of **5-H<sub>2</sub>**.



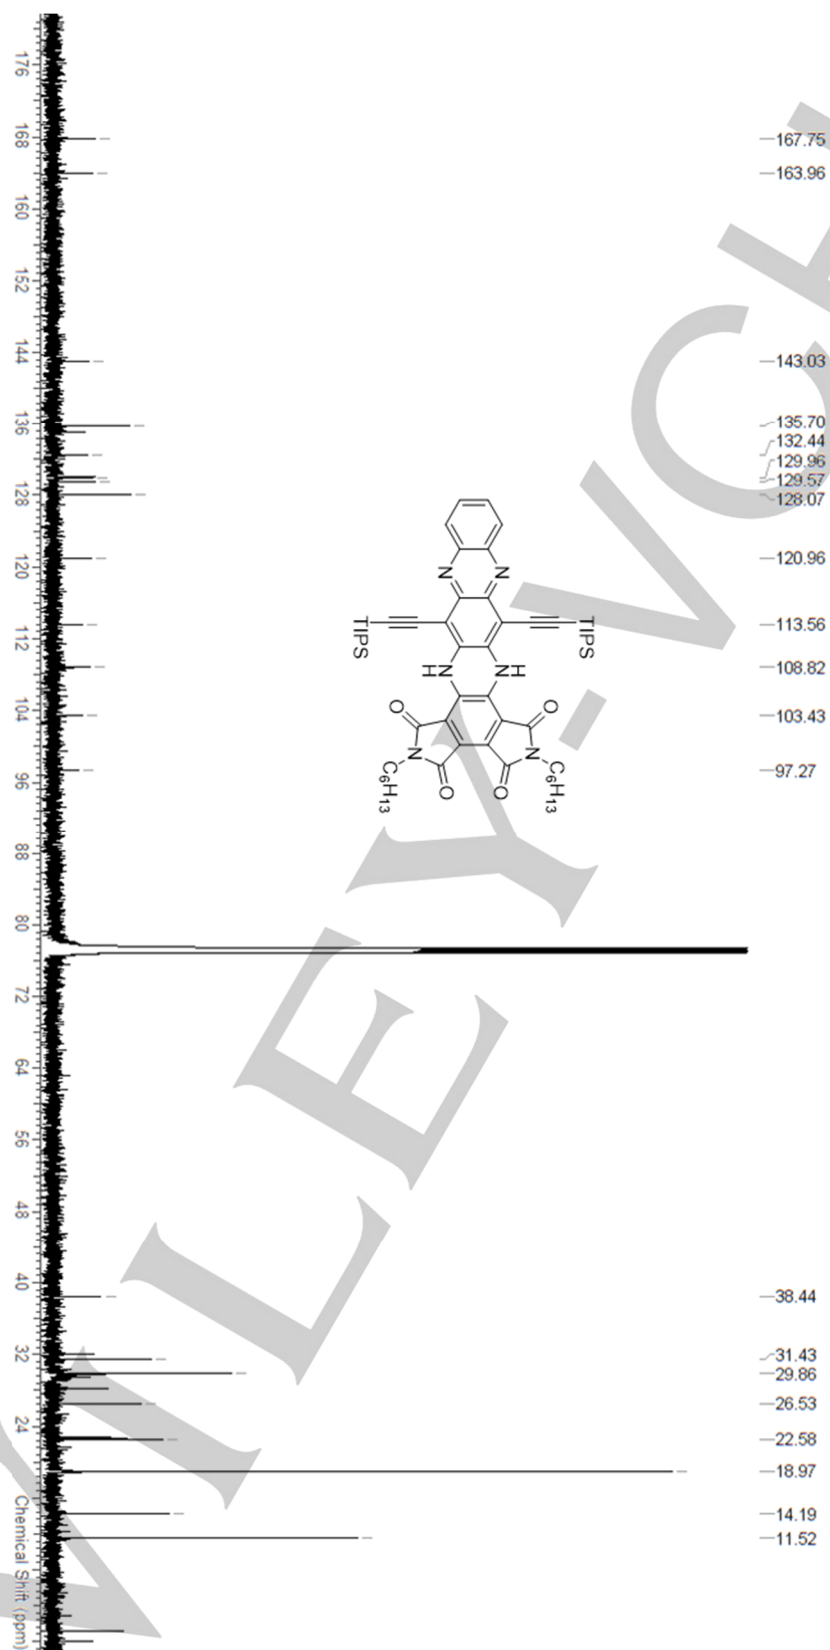

Figure S30. <sup>13</sup>C NMR spectrum (150.9 MHz, CDCl<sub>3</sub>, 295 K) of 5-H<sub>2</sub>.

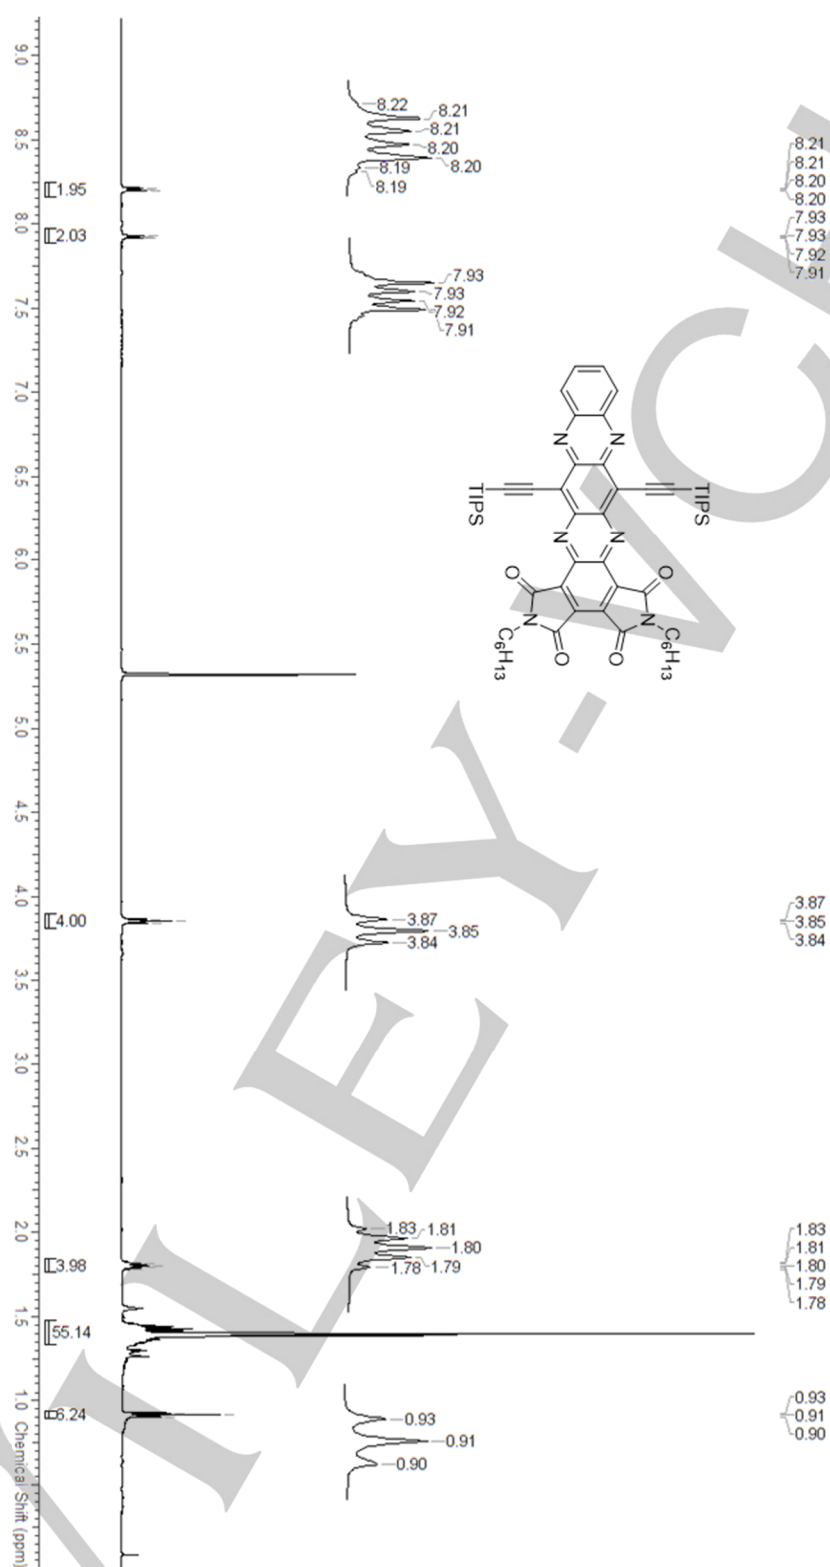

Figure S531.  $^1\text{H}$  NMR spectrum (600.2 MHz,  $\text{CD}_2\text{Cl}_2$ , 295 K) of **5a**.

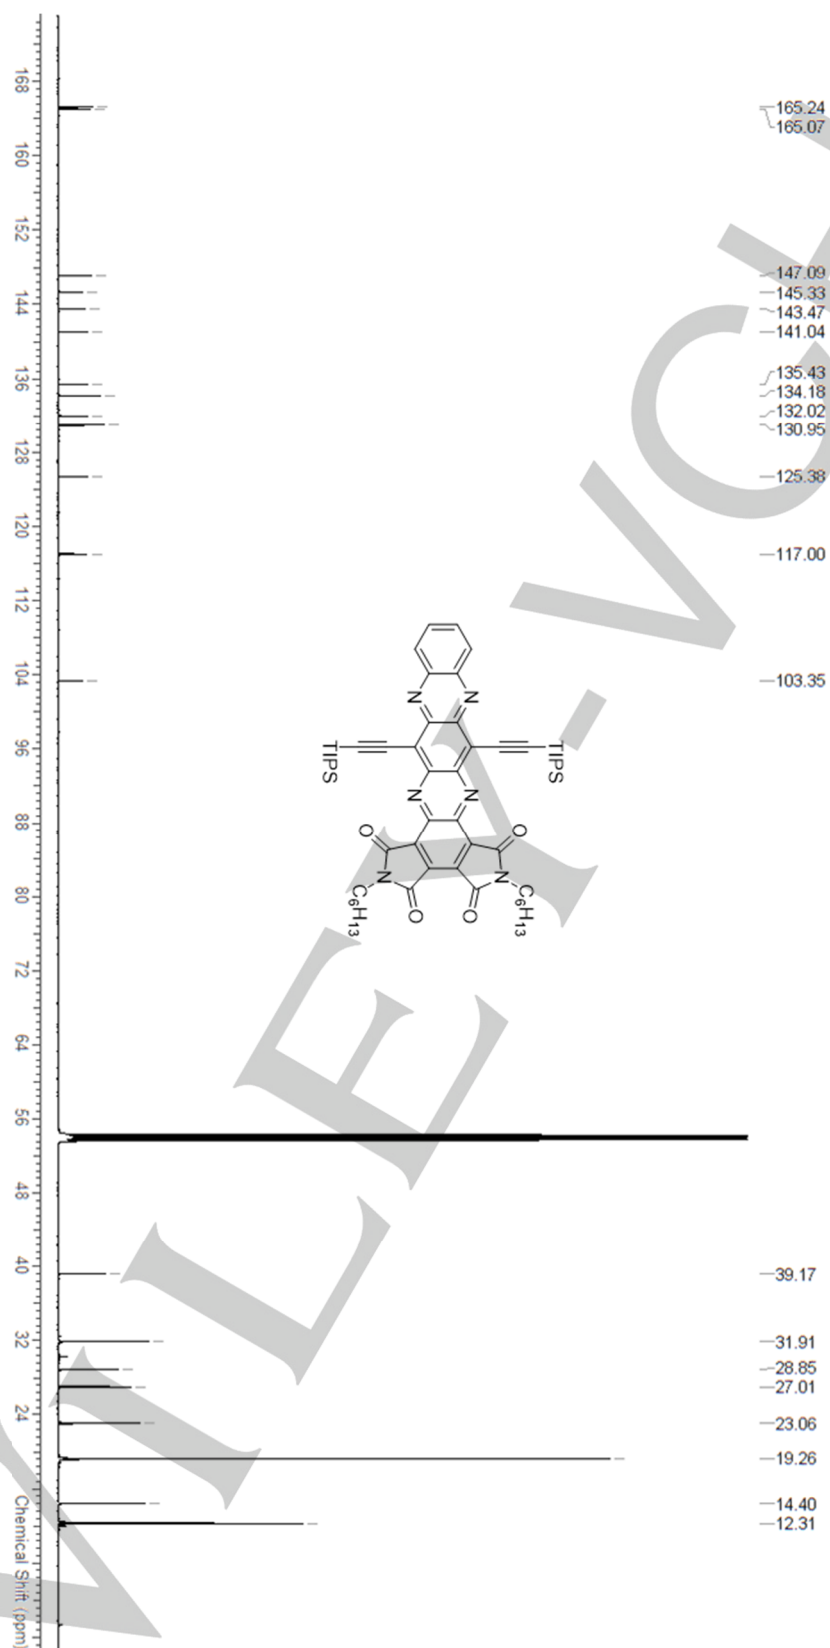

**Figure S32.**  $^{13}\text{C}$  NMR spectrum (150.9 MHz,  $\text{CD}_2\text{Cl}_2$ , 295 K) of **5a**.

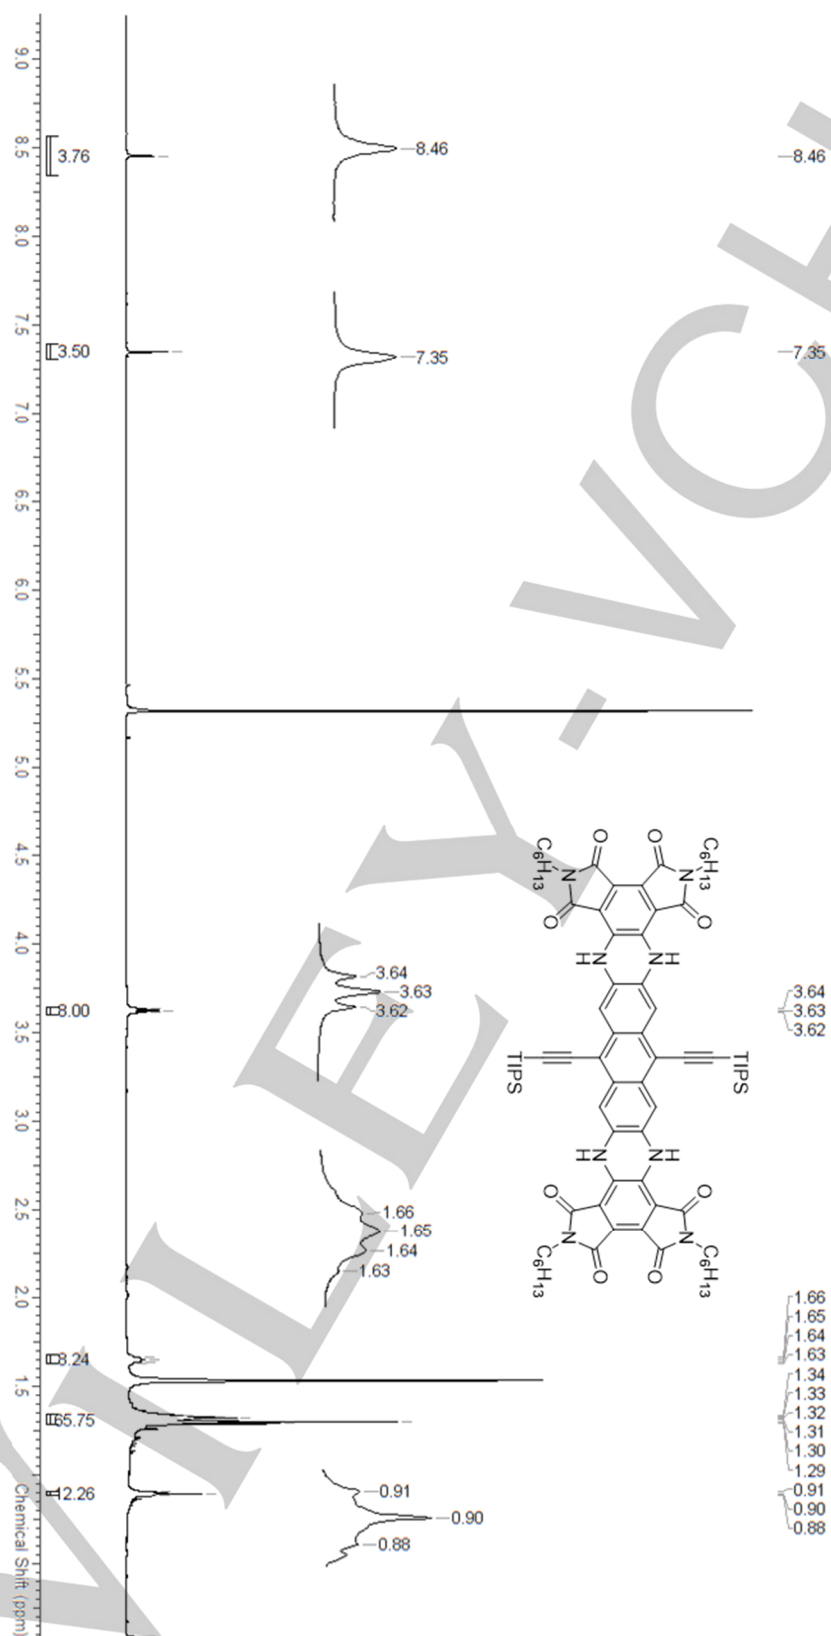

**Figure S633.**  $^1\text{H}$  NMR spectrum (600.2 MHz,  $\text{CD}_2\text{Cl}_2$ , 295 K) of **12-H<sub>4</sub>**.

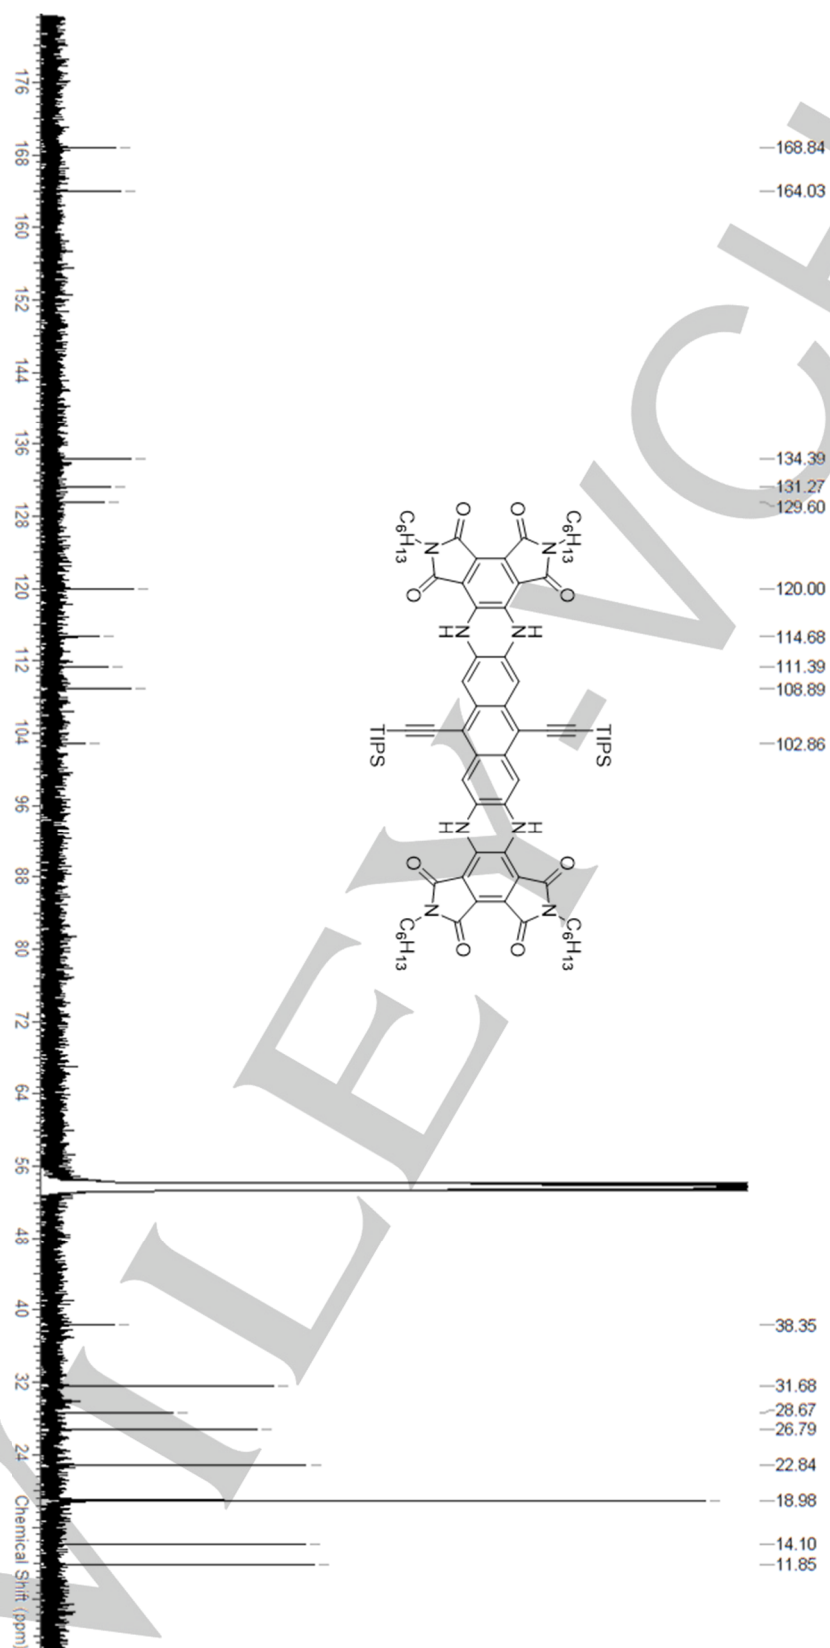

**Figure S34.** <sup>13</sup>C NMR spectrum (150.9 MHz, CD<sub>2</sub>Cl<sub>2</sub>, 295 K) of **12-H<sub>4</sub>**.

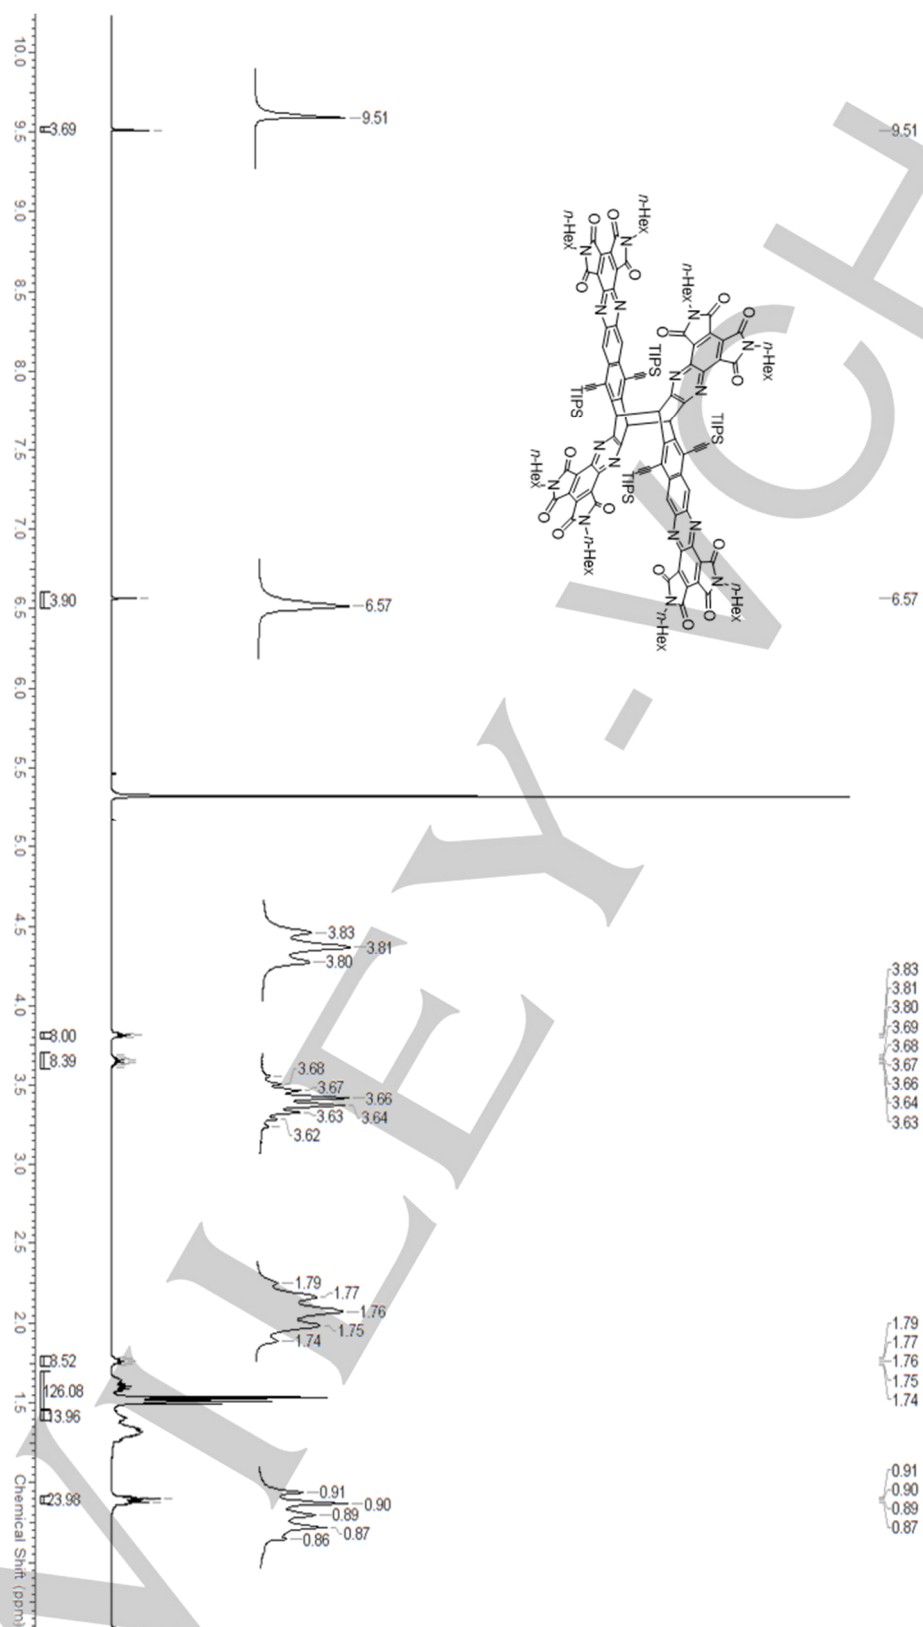

Figure S35.  $^1\text{H}$  NMR spectrum (600.2 MHz,  $\text{CD}_2\text{Cl}_2$ , 295 K) of **13**.

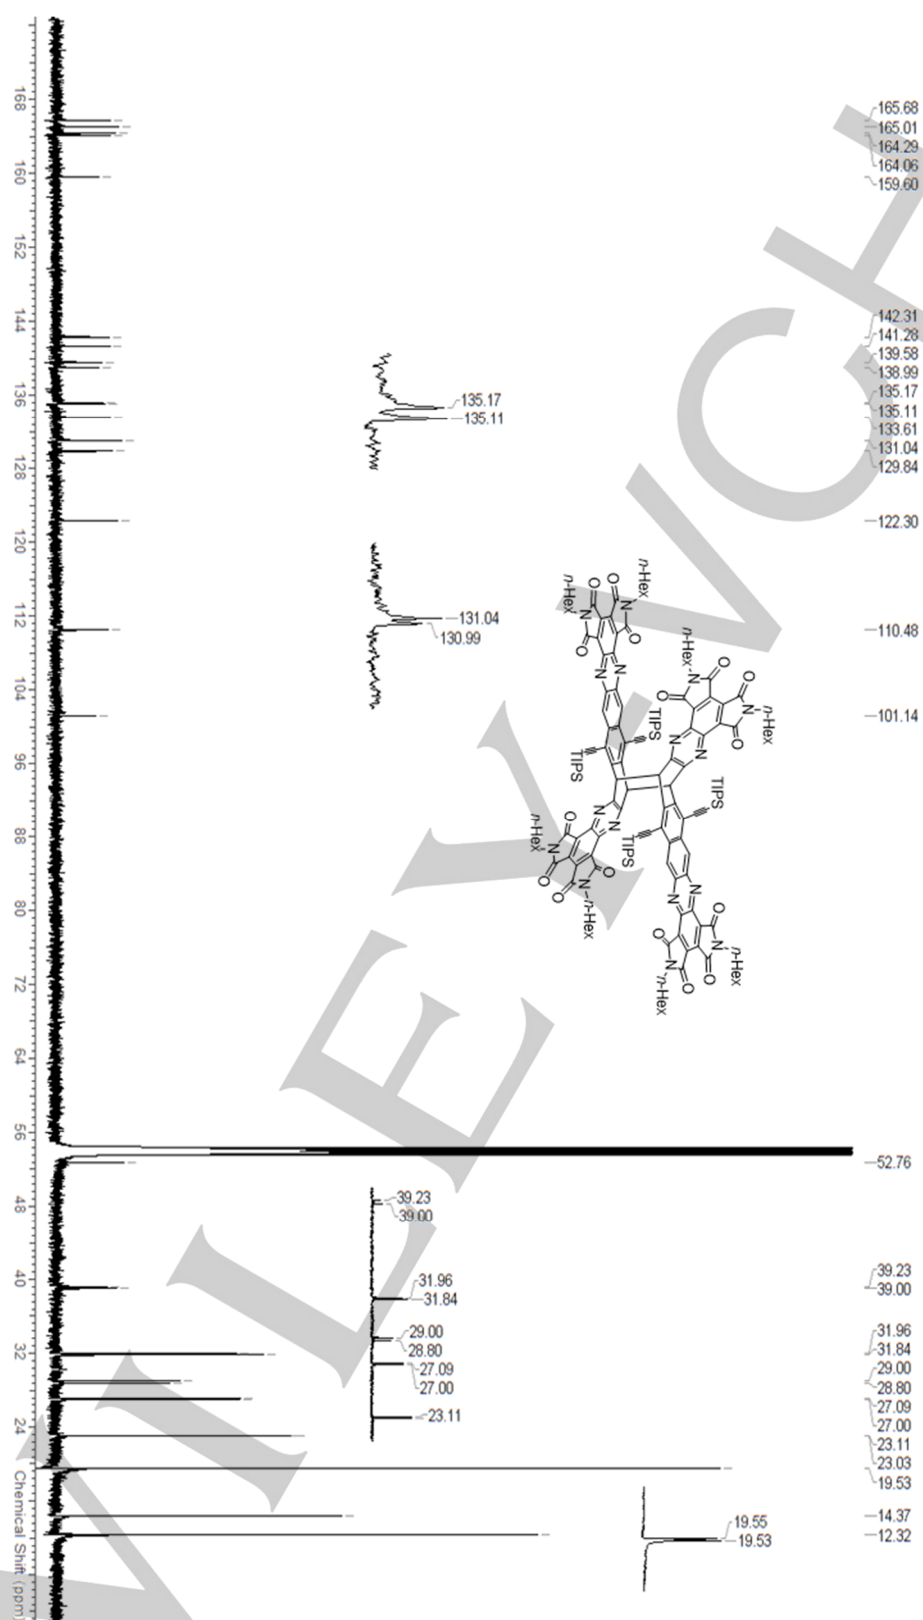

Figure S36.  $^{13}\text{C}$  NMR spectrum (150.9 MHz,  $\text{CD}_2\text{Cl}_2$ , 295 K) of 13.

## 10) Infrared Spectroscopy

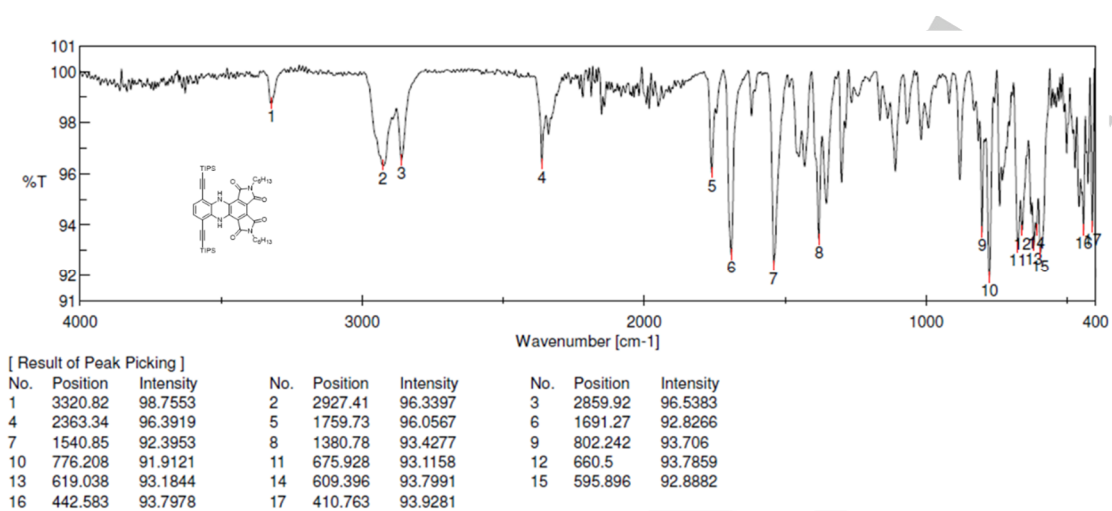Figure S37. IR spectrum of 1-H<sub>2</sub>.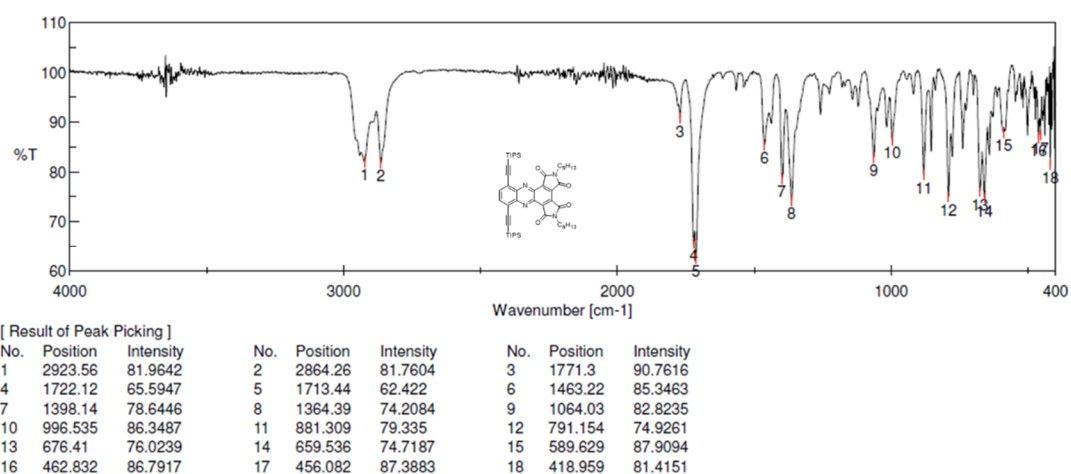

Figure S38. IR spectrum of 1a.

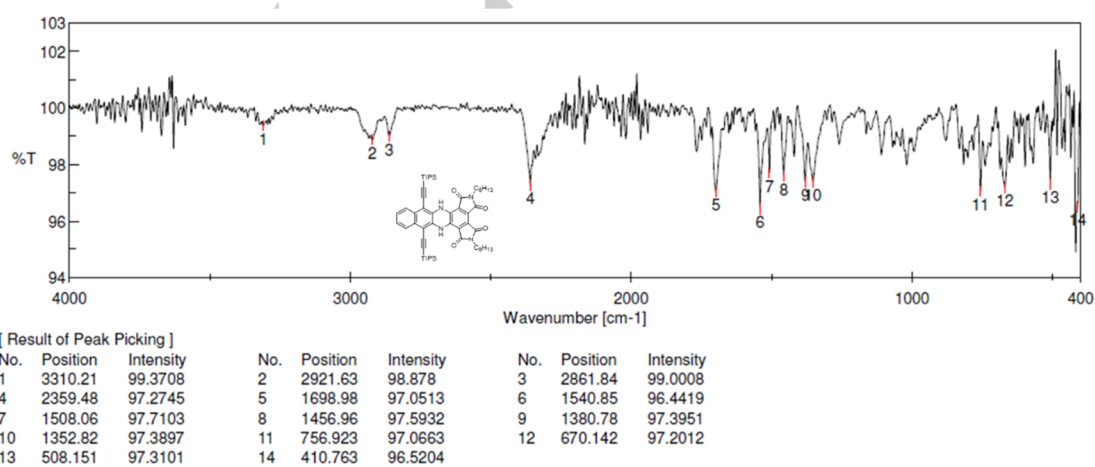Figure S39. IR spectrum of 2-H<sub>2</sub>.



## COMMUNICATION

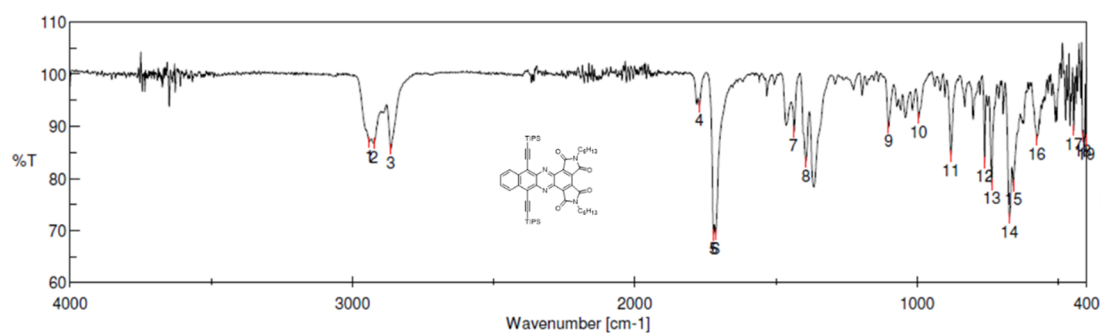

[ Result of Peak Picking ]

| No. | Position | Intensity | No. | Position | Intensity | No. | Position | Intensity |
|-----|----------|-----------|-----|----------|-----------|-----|----------|-----------|
| 1   | 2940.43  | 86.9497   | 2   | 2924.04  | 86.7366   | 3   | 2863.77  | 85.6955   |
| 4   | 1771.78  | 93.7463   | 5   | 1721.16  | 69.1743   | 6   | 1713.44  | 69.2362   |
| 7   | 1435.74  | 88.8654   | 8   | 1394.28  | 83.1623   | 9   | 1101.15  | 89.7607   |
| 10  | 995.089  | 91.4952   | 11  | 880.827  | 84.2593   | 12  | 761.262  | 83.044    |
| 13  | 735.71   | 78.8021   | 14  | 673.035  | 72.3606   | 15  | 659.536  | 78.5822   |
| 16  | 576.612  | 87.2962   | 17  | 444.994  | 89.185    | 18  | 414.138  | 87.9988   |
| 19  | 402.085  | 87.2334   |     |          |           |     |          |           |

Figure S40. IR spectrum of 2a.

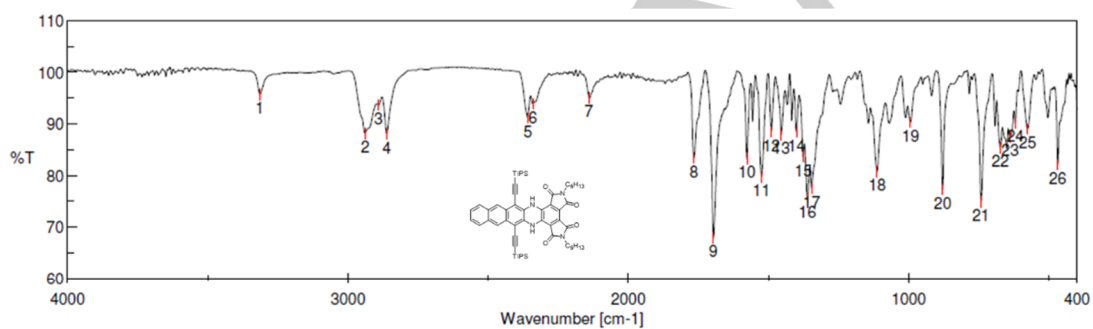

[ Result of Peak Picking ]

| No. | Position | Intensity | No. | Position | Intensity | No. | Position | Intensity |
|-----|----------|-----------|-----|----------|-----------|-----|----------|-----------|
| 1   | 3314.07  | 95.6373   | 2   | 2938.98  | 88.0774   | 3   | 2890.77  | 93.6185   |
| 4   | 2861.84  | 87.9901   | 5   | 2359.48  | 91.1174   | 6   | 2341.16  | 93.9018   |
| 7   | 2138.67  | 94.9573   | 8   | 1766.48  | 83.3297   | 9   | 1697.05  | 67.9341   |
| 10  | 1577.49  | 83.214    | 11  | 1525.42  | 79.6784   | 12  | 1489.74  | 88.4341   |
| 13  | 1455.03  | 87.8336   | 14  | 1400.07  | 88.4267   | 15  | 1375.96  | 83.5317   |
| 16  | 1361.5   | 75.5644   | 17  | 1346.07  | 77.4817   | 18  | 1112.73  | 80.69     |
| 19  | 994.125  | 90.2478   | 20  | 879.381  | 77.2266   | 21  | 742.46   | 74.8928   |
| 22  | 673.999  | 85.3269   | 23  | 638.323  | 87.4131   | 24  | 620.002  | 90.1609   |
| 25  | 576.612  | 88.9724   | 26  | 468.617  | 82.1453   |     |          |           |

Figure S41. IR spectrum of 3-H<sub>2</sub>.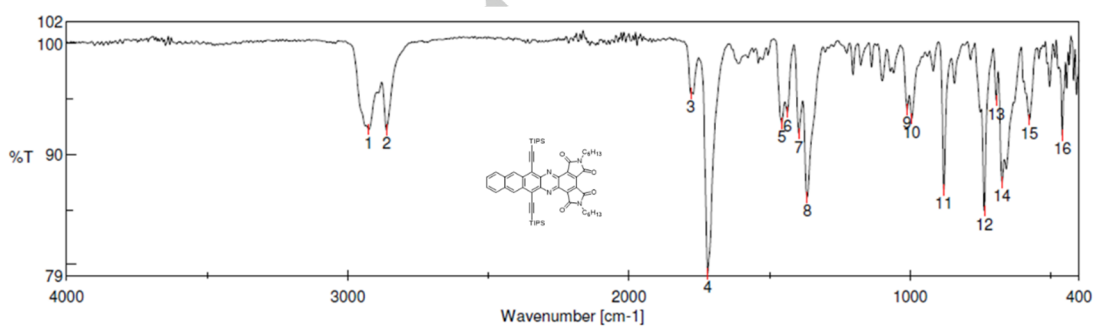

[ Result of Peak Picking ]

| No. | Position | Intensity | No. | Position | Intensity | No. | Position | Intensity |
|-----|----------|-----------|-----|----------|-----------|-----|----------|-----------|
| 1   | 2925.48  | 92.2517   | 2   | 2861.84  | 92.1915   | 3   | 1779.97  | 95.478    |
| 4   | 1720.19  | 79.1393   | 5   | 1456.96  | 92.8046   | 6   | 1436.71  | 93.7842   |
| 7   | 1396.21  | 91.8697   | 8   | 1366.32  | 86.136    | 9   | 1011.48  | 94.0489   |
| 10  | 995.089  | 93.2311   | 11  | 880.345  | 86.7738   | 12  | 736.674  | 84.9186   |
| 13  | 694.248  | 94.8604   | 14  | 673.999  | 87.4789   | 15  | 576.612  | 93.1231   |
| 16  | 458.975  | 91.725    |     |          |           |     |          |           |

Figure S42. IR spectrum of 3a.

## COMMUNICATION

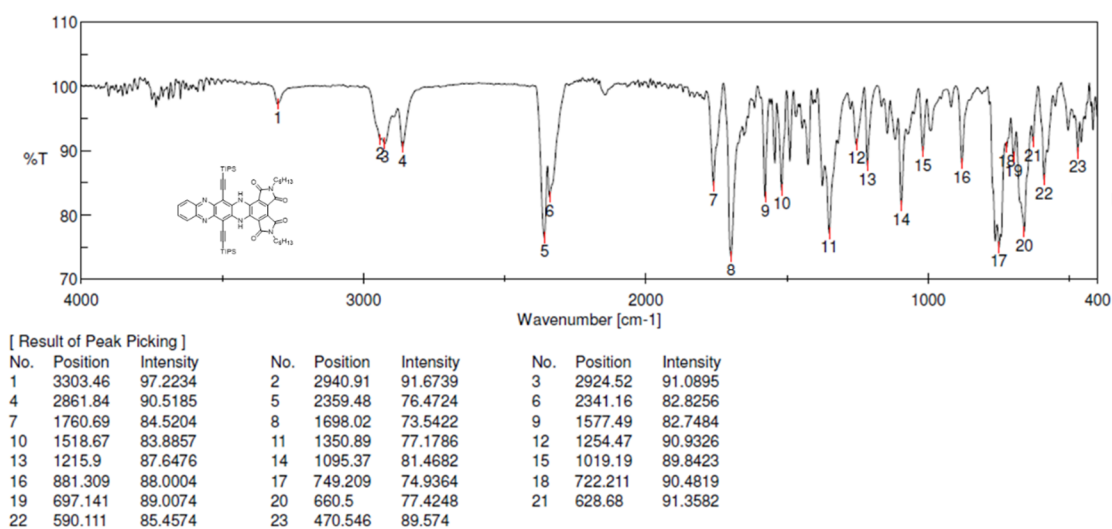Figure S43. IR spectrum of 4-H<sub>2</sub>.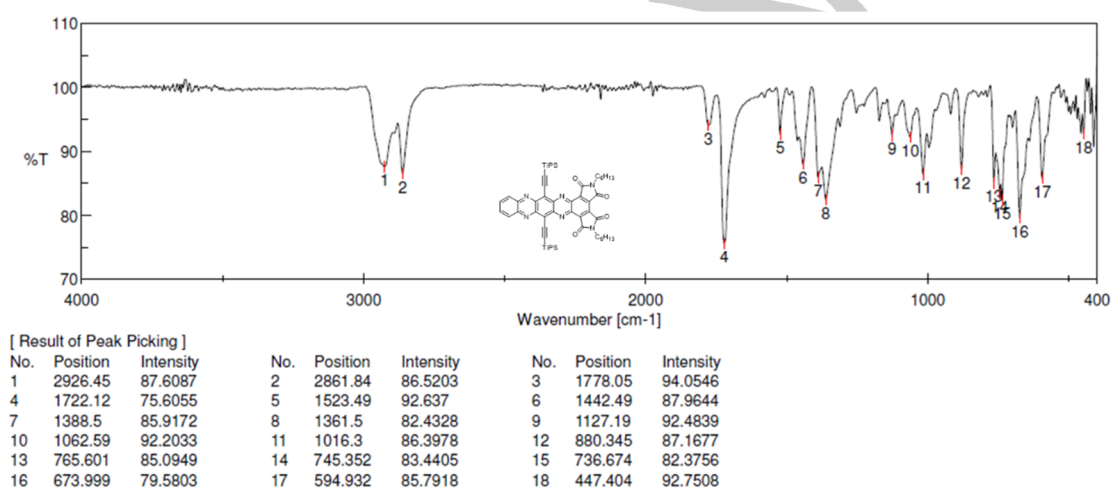

Figure S44. IR spectrum of 4a.

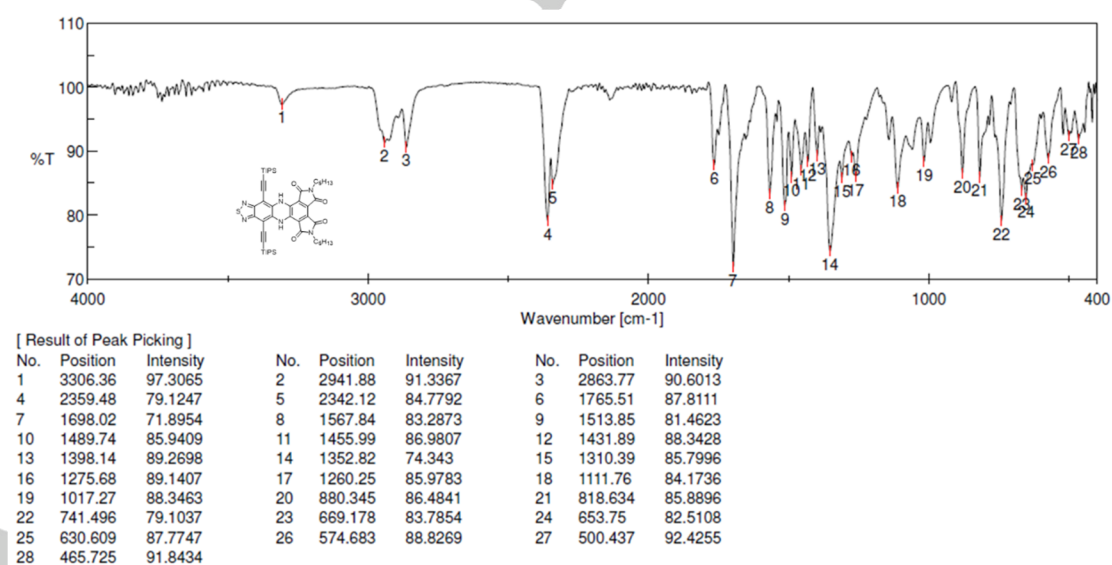Figure S45. IR spectrum of 5-H<sub>2</sub>.

## COMMUNICATION

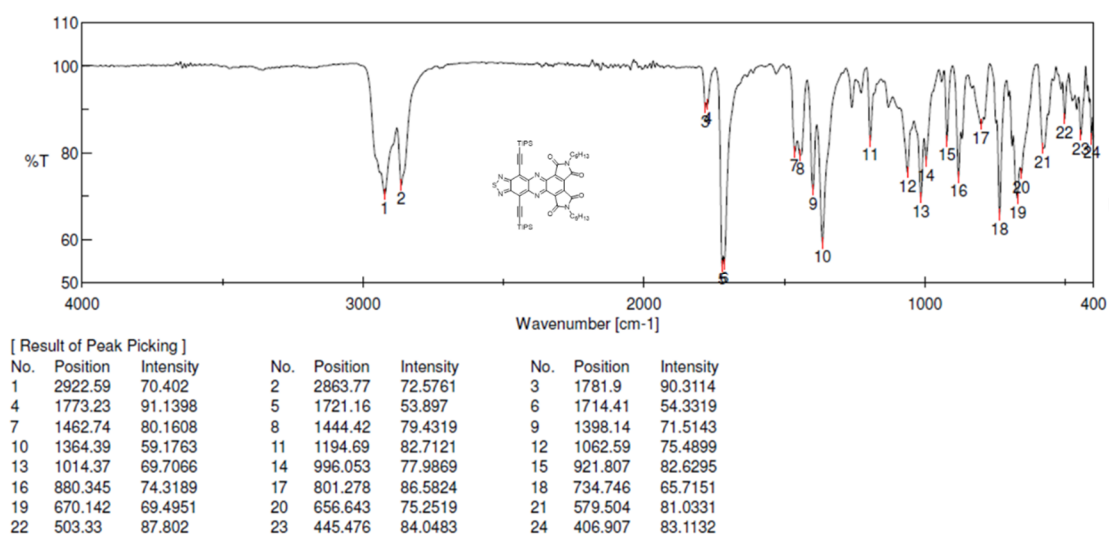

Figure S46. IR spectrum of 5a.

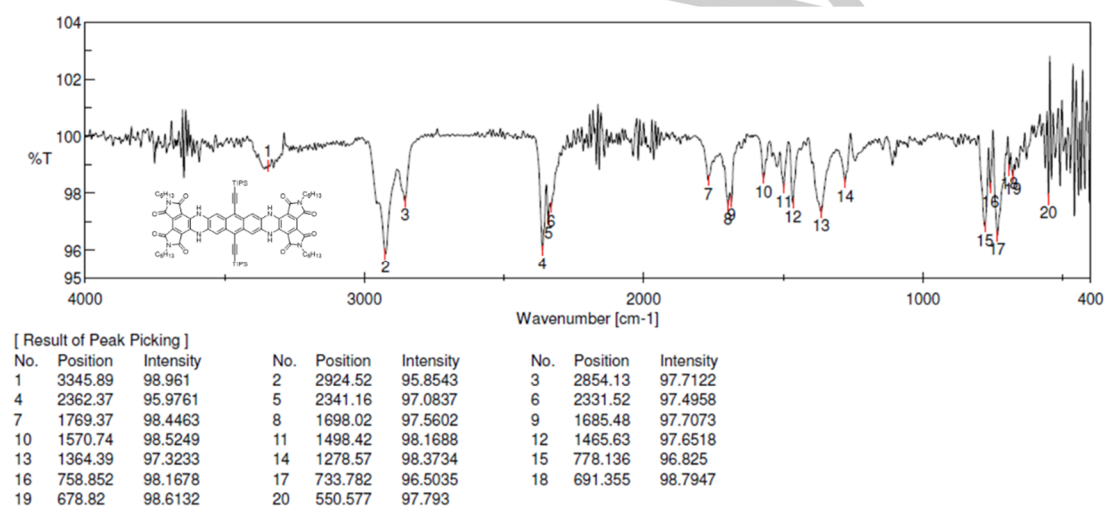Figure S47. IR spectrum of 12-H<sub>4</sub>.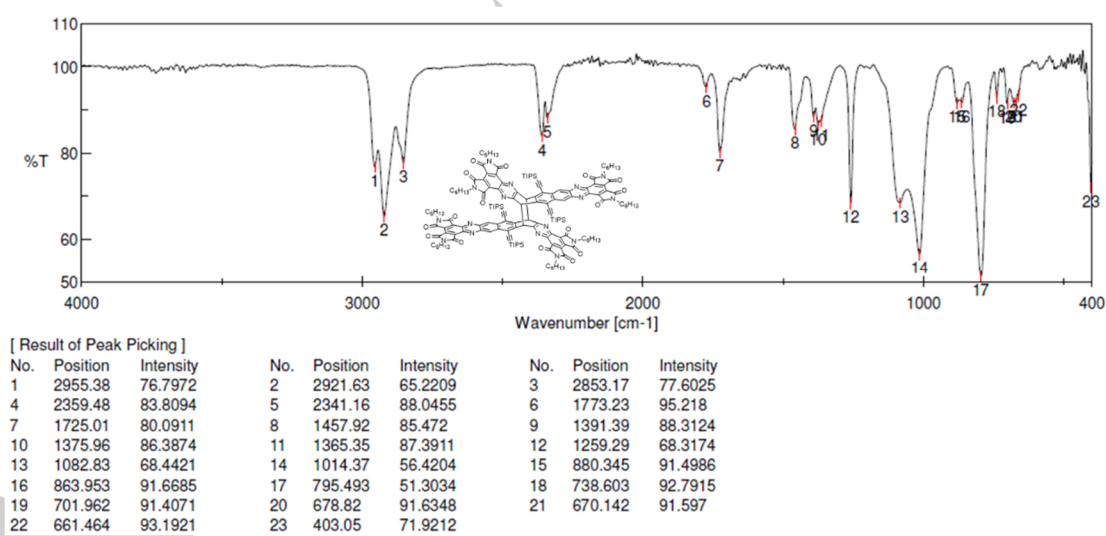

Figure S48. IR spectrum of 13.

## 11) HRMS Spectra

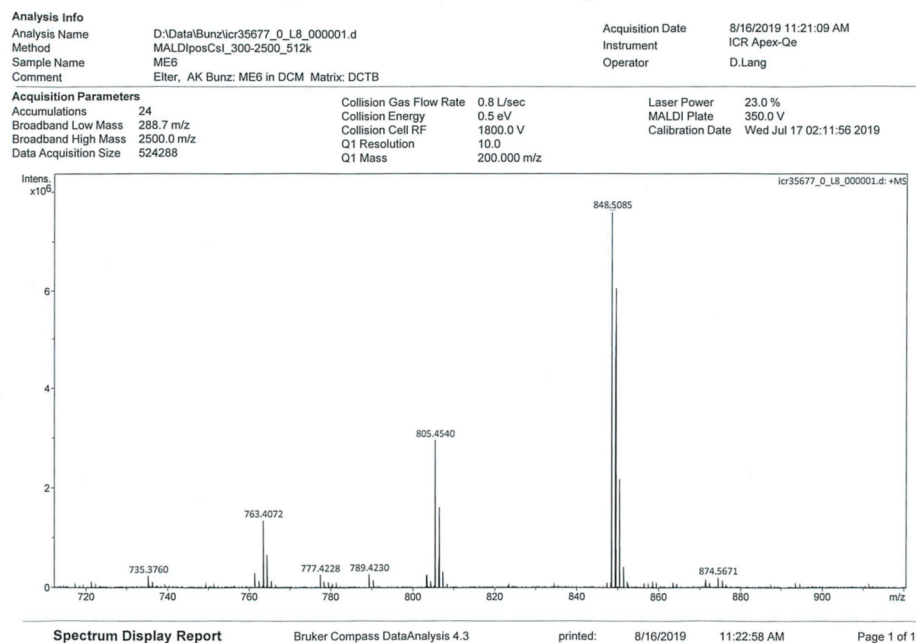Figure S49: HRMS Spectrum of **1-H<sub>2</sub>**.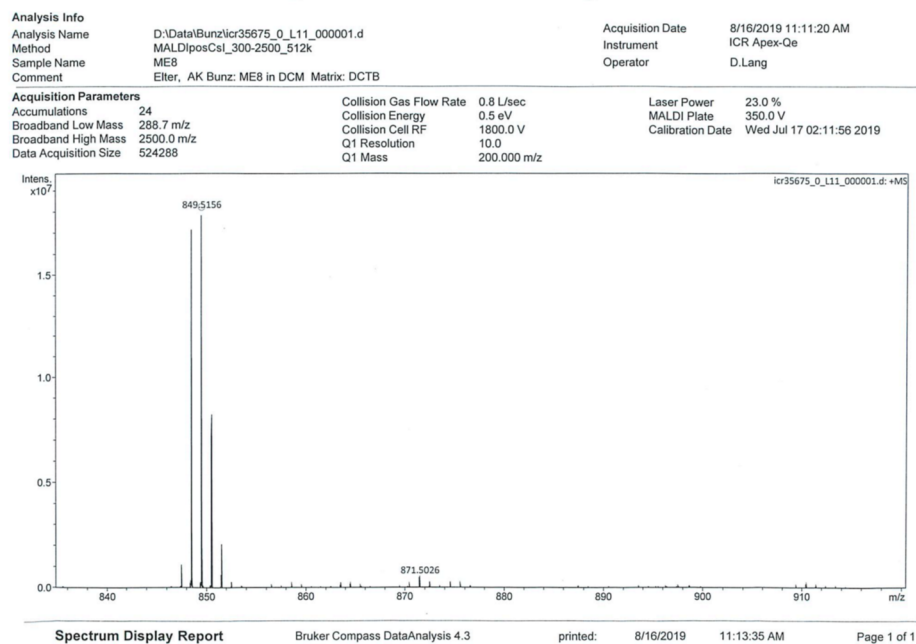Figure S50: HRMS Spectrum of **1a**.

## COMMUNICATION

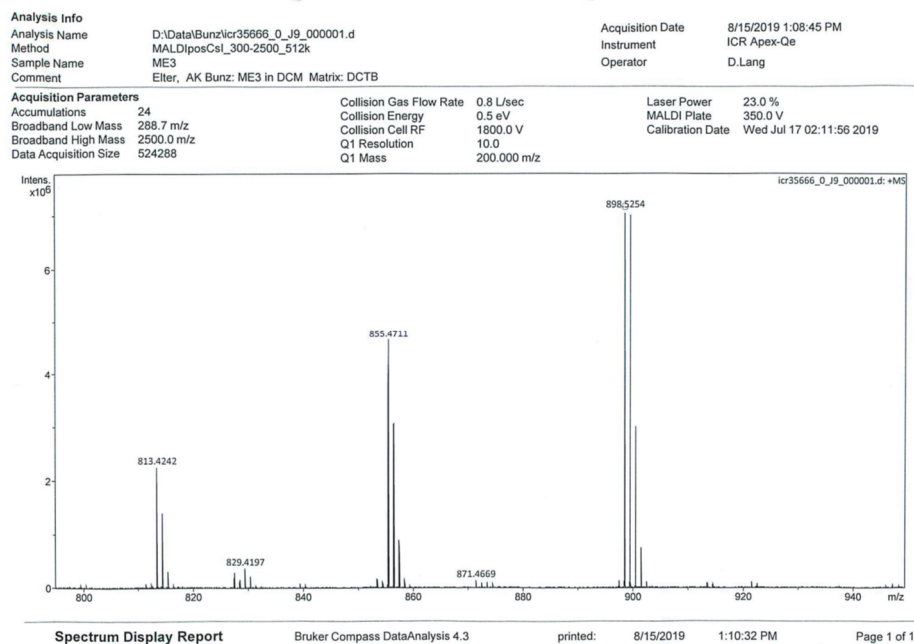Figure S51: HRMS Spectrum of 2-H<sub>2</sub>.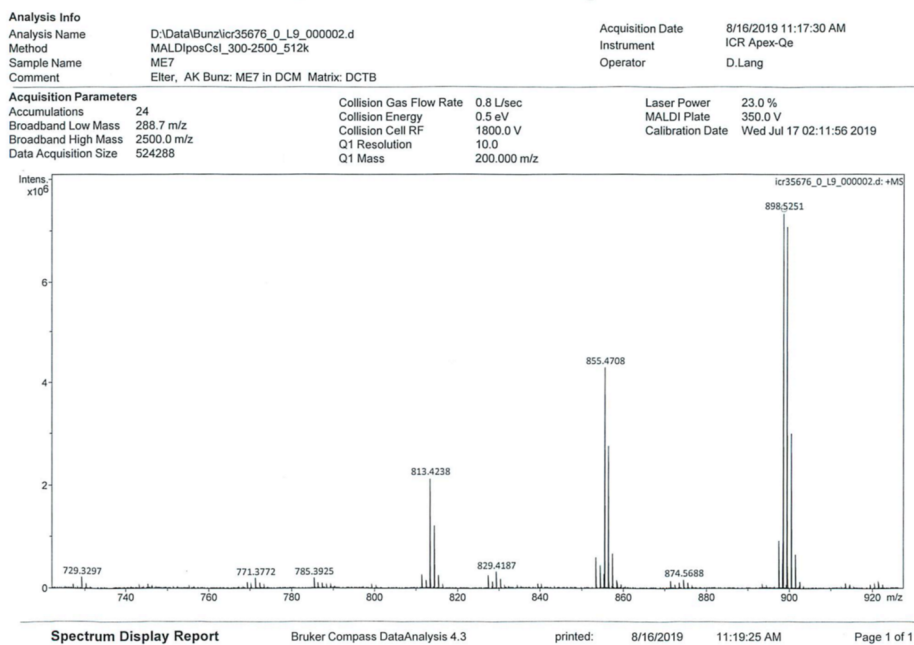

Figure S527: HRMS Spectrum of 2a.

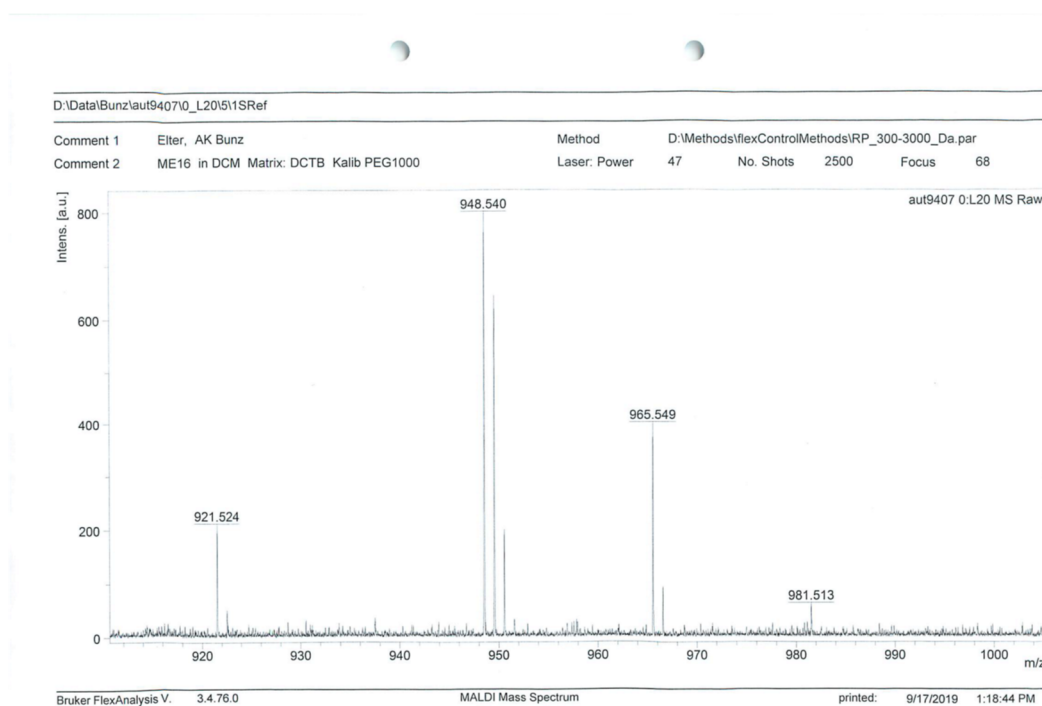

## SmartFormula

| Formula                                                                       | Mass     | Error  | mSigma  | DbtEq | N rule | Electron Configuration |
|-------------------------------------------------------------------------------|----------|--------|---------|-------|--------|------------------------|
| C <sub>58</sub> H <sub>76</sub> N <sub>4</sub> O <sub>4</sub> Si <sub>2</sub> | 948.5400 | 0.4355 | 69.2529 | 25.00 | ok     | odd                    |

*aut 9407 / L20/5 Kalib PEG 1000*

Figure S53: HRMS Spectrum of **3-H<sub>2</sub>** and attached HRMS Value.

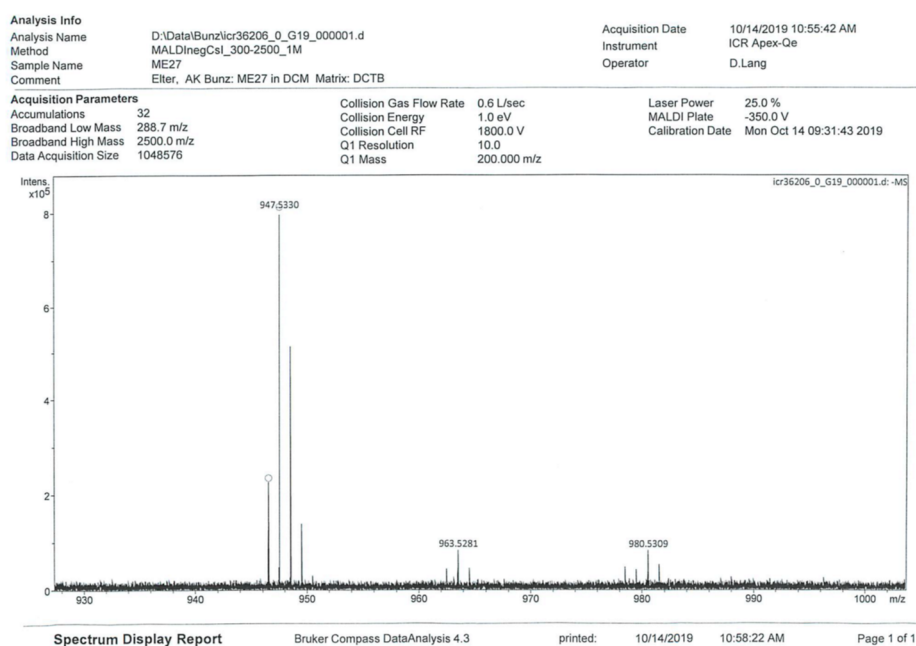

Figure S54: HRMS Spectrum of **3a**.

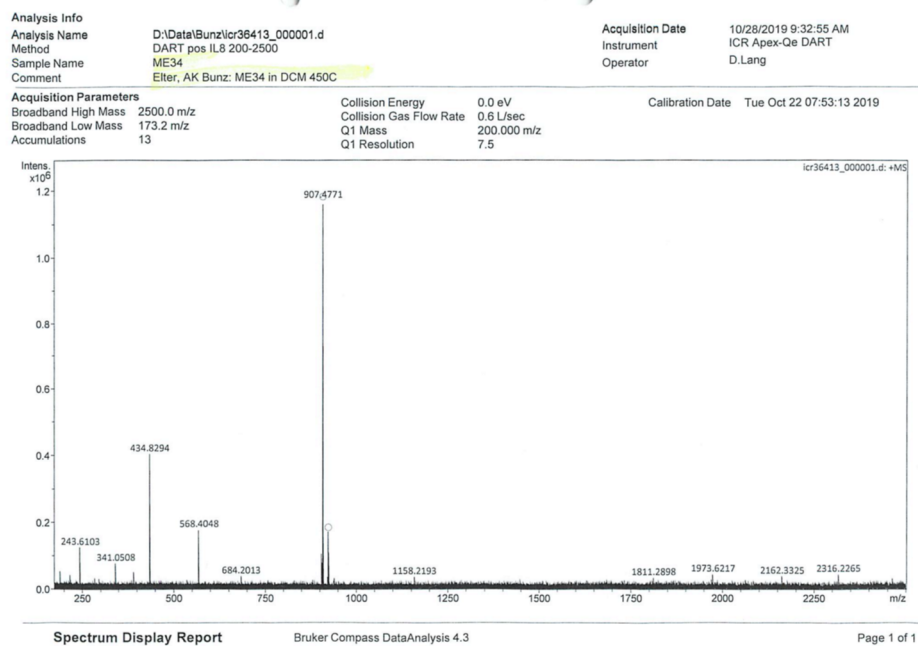Figure S55: HRMS Spectrum of 4-H<sub>2</sub>.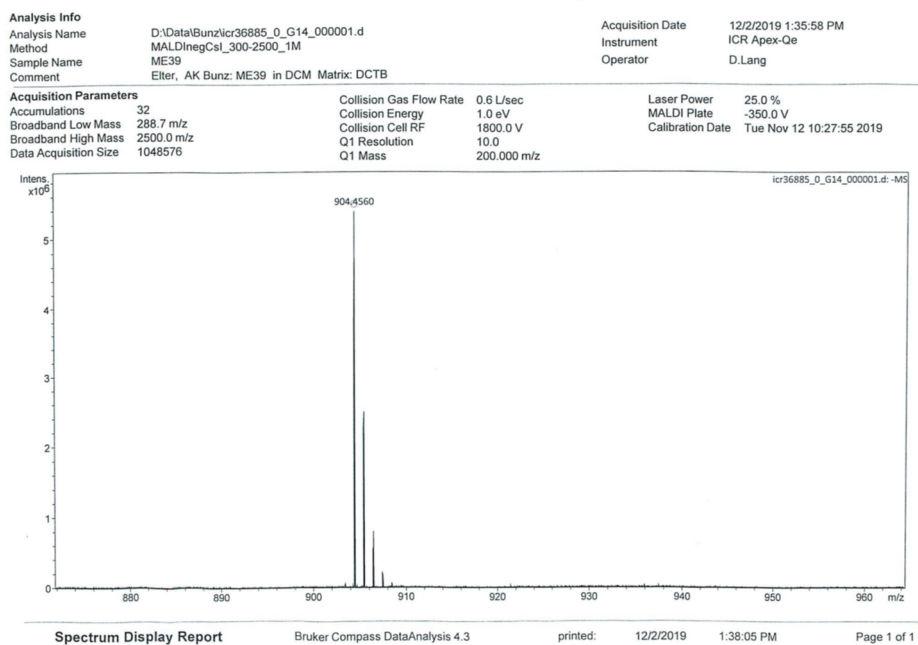

Figure S56: HRMS Spectrum of 4a.

## COMMUNICATION

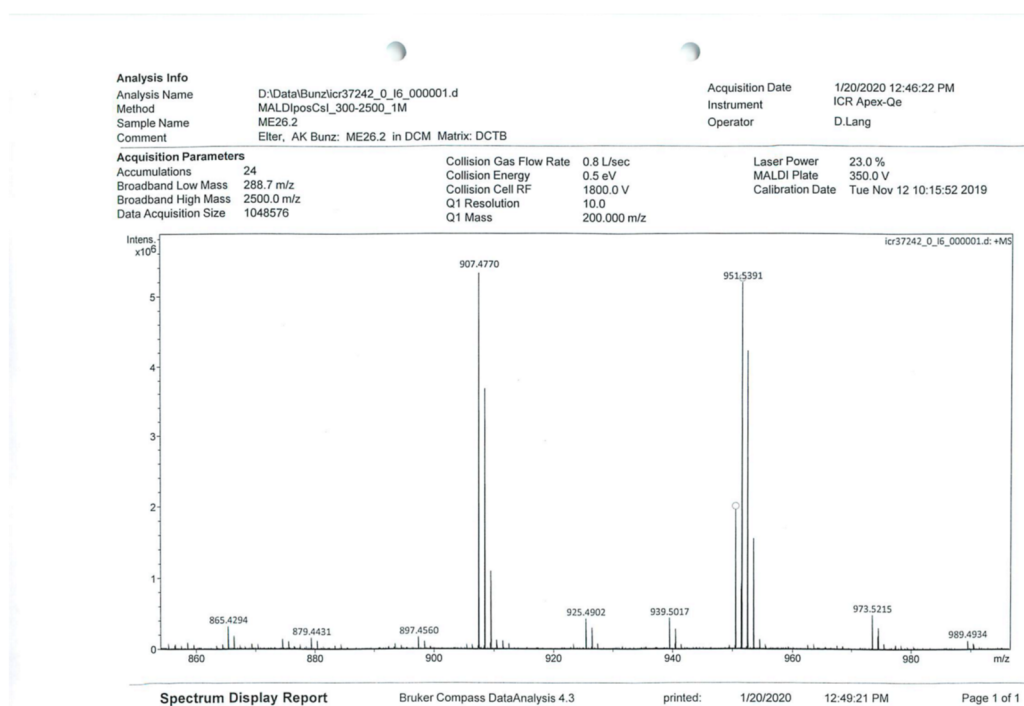Figure S57: HRMS Spectrum of 5-H<sub>2</sub>.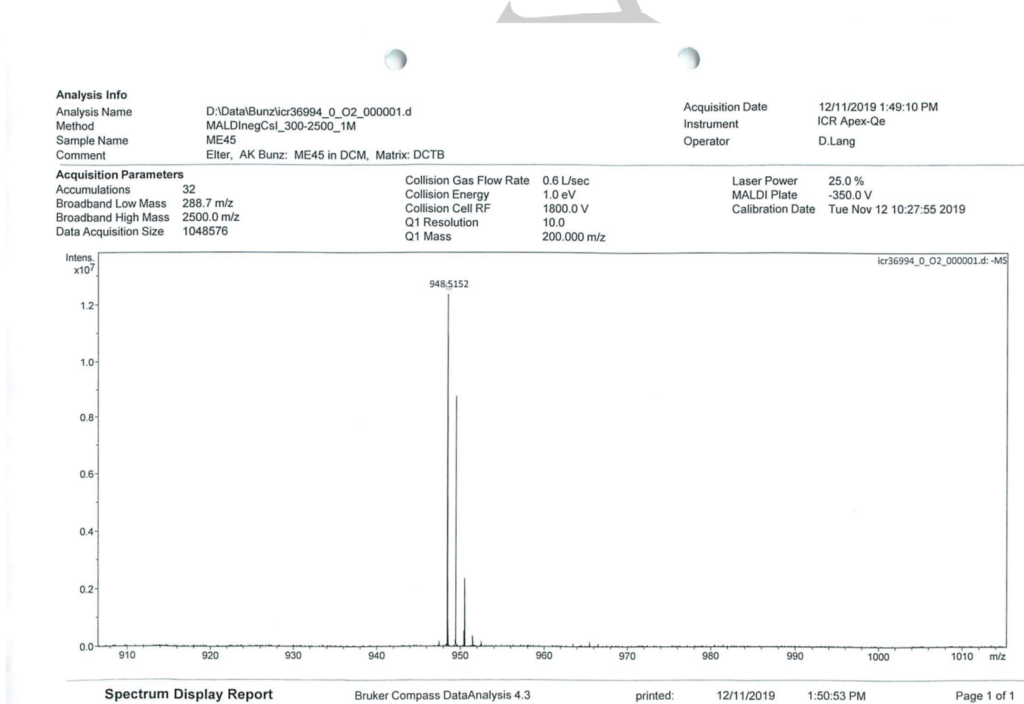

Figure S58: HRMS Spectrum of 5a.



## COMMUNICATION

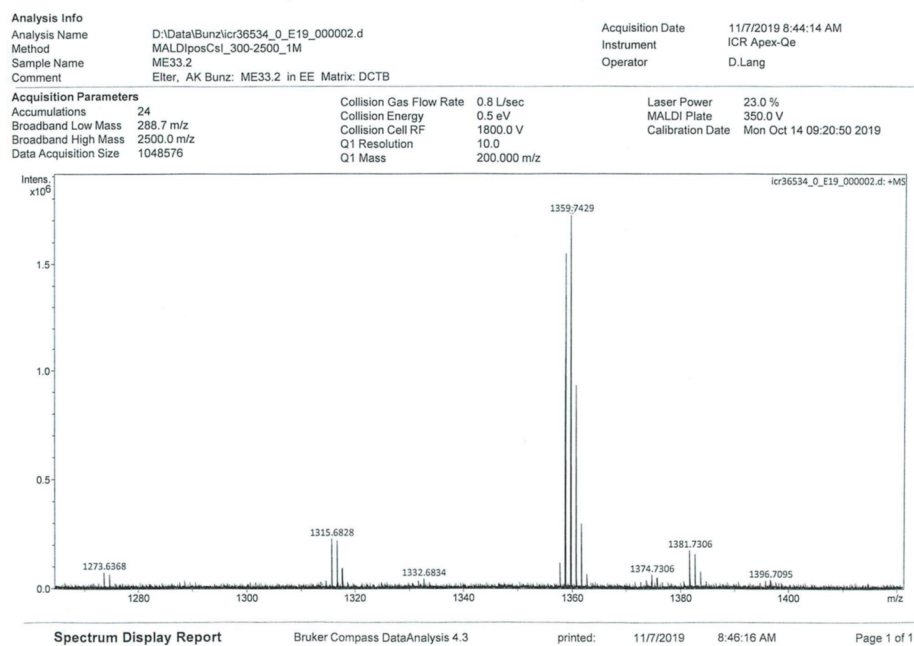Figure S59: HRMS Spectrum of 12-H<sub>4</sub>.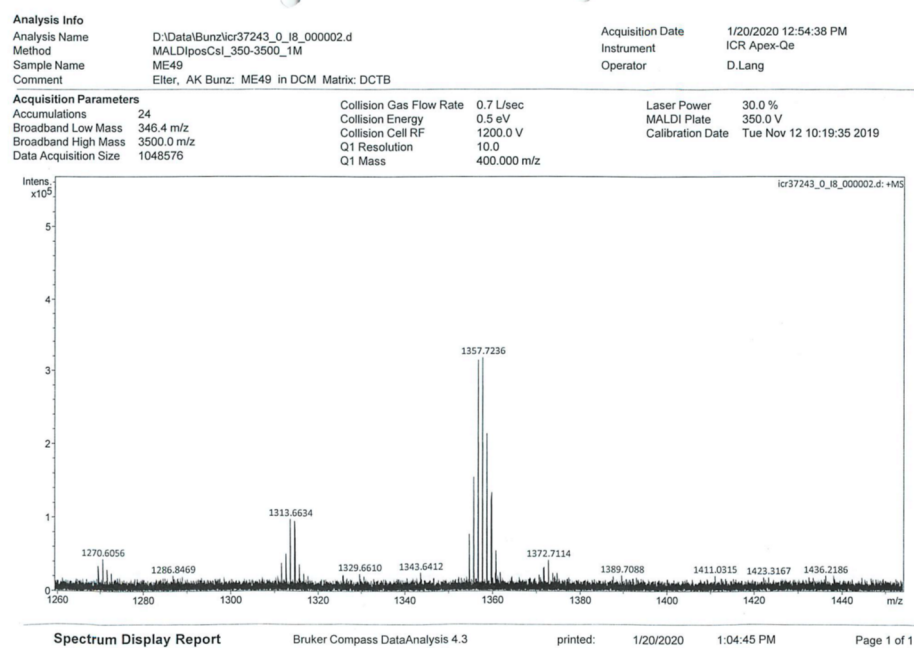

Figure S60: HRMS Spectrum of 13.

## 12) Crystallographic Data

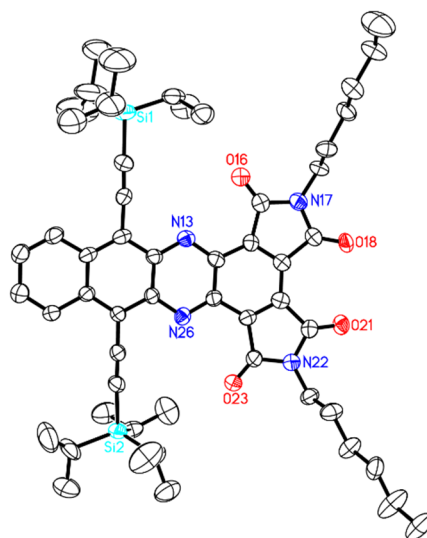Table S7. Crystal data and structure of **2a**.

|                                   |                                                                                                         |
|-----------------------------------|---------------------------------------------------------------------------------------------------------|
| CCDC:                             | 2080832                                                                                                 |
| Identification code               | mel2                                                                                                    |
| Empirical formula                 | C <sub>54</sub> H <sub>72</sub> N <sub>4</sub> O <sub>4</sub> Si <sub>2</sub>                           |
| Formula weight                    | 897.33                                                                                                  |
| Temperature                       | 200(2) K                                                                                                |
| Wavelength                        | 1.54178 Å                                                                                               |
| Crystal system                    | trigonal                                                                                                |
| Space group                       | P3 <sub>2</sub>                                                                                         |
| Z                                 | 3                                                                                                       |
| Unit cell dimensions              | a = 22.6826(14) Å    α = 90 deg.<br>b = 22.6826(14) Å    β = 90 deg.<br>c = 8.7800(7) Å    γ = 120 deg. |
| Volume                            | 3912.1(6) Å <sup>3</sup>                                                                                |
| Density (calculated)              | 1.14 g/cm <sup>3</sup>                                                                                  |
| Absorption coefficient            | 0.98 mm <sup>-1</sup>                                                                                   |
| Crystal shape                     | needle                                                                                                  |
| Crystal size                      | 0.141 x 0.021 x 0.021 mm <sup>3</sup>                                                                   |
| Crystal colour                    | green                                                                                                   |
| Theta range for data collection   | 3.9 to 53.4 deg.                                                                                        |
| Index ranges                      | -23 ≤ h ≤ 23, -23 ≤ k ≤ 23, -5 ≤ l ≤ 9                                                                  |
| Reflections collected             | 18747                                                                                                   |
| Independent reflections           | 4432 (R(int) = 0.1362)                                                                                  |
| Observed reflections              | 3094 (I > 2σ(I))                                                                                        |
| Absorption correction             | Semi-empirical from equivalents                                                                         |
| Max. and min. transmission        | 1.39 and 0.76                                                                                           |
| Refinement method                 | Full-matrix least-squares on F <sup>2</sup>                                                             |
| Data/restraints/parameters        | 4432 / 498 / 592                                                                                        |
| Goodness-of-fit on F <sup>2</sup> | 1.17                                                                                                    |
| Final R indices (I > 2σ(I))       | R1 = 0.069, wR2 = 0.129                                                                                 |
| Absolute structure parameter      | 0.22(11)                                                                                                |
| Largest diff. peak and hole       | 0.37 and -0.31 eÅ <sup>-3</sup>                                                                         |

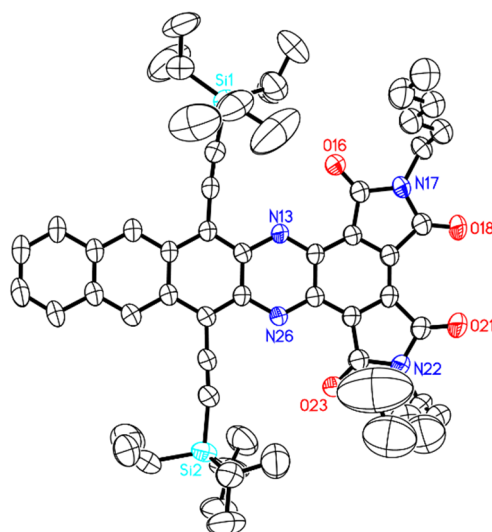**Table S8.** Crystal data and structure of **3-H<sub>2</sub>**.

|                                   |                                                                                                                                             |
|-----------------------------------|---------------------------------------------------------------------------------------------------------------------------------------------|
| CCDC:                             | 2080833                                                                                                                                     |
| Identification code               | me14sq                                                                                                                                      |
| Empirical formula                 | C <sub>58</sub> H <sub>76</sub> N <sub>4</sub> O <sub>4</sub> Si <sub>2</sub>                                                               |
| Formula weight                    | 949.40                                                                                                                                      |
| Temperature                       | 200(2) K                                                                                                                                    |
| Wavelength                        | 1.54178 Å                                                                                                                                   |
| Crystal system                    | triclinic                                                                                                                                   |
| Space group                       | P $\bar{1}$                                                                                                                                 |
| Z                                 | 2                                                                                                                                           |
| Unit cell dimensions              | a = 12.4181(10) Å $\alpha$ = 106.780(5) deg.<br>b = 16.2442(12) Å $\beta$ = 100.328(6) deg.<br>c = 17.1559(11) Å $\gamma$ = 105.110(6) deg. |
| Volume                            | 3075.1(4) Å <sup>3</sup>                                                                                                                    |
| Density (calculated)              | 1.02 g/cm <sup>3</sup>                                                                                                                      |
| Absorption coefficient            | 0.85 mm <sup>-1</sup>                                                                                                                       |
| Crystal shape                     | brick                                                                                                                                       |
| Crystal size                      | 0.170 x 0.035 x 0.031 mm <sup>3</sup>                                                                                                       |
| Crystal colour                    | orange                                                                                                                                      |
| Theta range for data collection   | 3.0 to 60.0 deg.                                                                                                                            |
| Index ranges                      | -13 ≤ h ≤ 12, -18 ≤ k ≤ 15, -18 ≤ l ≤ 19                                                                                                    |
| Reflections collected             | 23780                                                                                                                                       |
| Independent reflections           | 9042 (R(int) = 0.0625)                                                                                                                      |
| Observed reflections              | 4643 (I > 2σ(I))                                                                                                                            |
| Absorption correction             | Semi-empirical from equivalents                                                                                                             |
| Max. and min. transmission        | 1.59 and 0.62                                                                                                                               |
| Refinement method                 | Full-matrix least-squares on F <sup>2</sup>                                                                                                 |
| Data/restraints/parameters        | 9042 / 2003 / 727                                                                                                                           |
| Goodness-of-fit on F <sup>2</sup> | 1.02                                                                                                                                        |
| Final R indices (I > 2σ(I))       | R1 = 0.078, wR2 = 0.199                                                                                                                     |
| Largest diff. peak and hole       | 0.39 and -0.29 eÅ <sup>-3</sup>                                                                                                             |

## 13) References

- [S1] H. E. Gottlieb, V. Kotlyar, A. Nudelman, *J. Org. Chem.* **1997**, *62*, 7512-7515.
- [S2] M. J. Frisch, G. W. Trucks, H. B. Schlegel, G. E. Scuseria, M. A. Robb, J. R. Cheeseman, G. Scalmani, V. Barone, G. A. Petersson, H. Nakatsuji, X. Li, M. Caricato, A. V. Marenich, J. Bloino, B. G. Janesko, R. Gomperts, B. Mennucci, H. P. Hratchian, J. V. Ortiz, A. F. Izmaylov, J. L. Sonnenberg, Williams, F. Ding, F. Lipparini, F. Egidi, J. Goings, B. Peng, A. Petrone, T. Henderson, D. Ranasinghe, V. G. Zakrzewski, J. Gao, N. Rega, G. Zheng, W. Liang, M. Hada, M. Ehara, K. Toyota, R. Fukuda, J. Hasegawa, M. Ishida, T. Nakajima, Y. Honda, O. Kitao, H. Nakai, T. Vreven, K. Throssell, J. A. Montgomery Jr., J. E. Peralta, F. Ogliaro, M. J. Bearpark, J. J. Heyd, E. N. Brothers, K. N. Kudin, V. N. Staroverov, T. A. Keith, R. Kobayashi, J. Normand, K. Raghavachari, A. P. Rendell, J. C. Burant, S. S. Iyengar, J. Tomasi, M. Cossi, J. M. Millam, M. Klene, C. Adamo, R. Cammi, J. W. Ochterski, R. L. Martin, K. Morokuma, O. Farkas, J. B. Foresman, D. J. Fox, Wallingford, CT, **2016**.
- [S3] S. M. Luo, K. A. Stellmach, S. M. Ikuzwe, D. D. Cao, *J. Org. Chem.* **2019**, *84*, 10362-10370.
- [S4] B. D. Lindner, J. U. Engelhart, M. Märken, O. Tverskoy, A. L. Appleton, F. Rominger, K. I. Hardcastle, M. Enders, U. H. F. Bunz, *Chem. Eur. J.* **2012**, *18*, 4627-4633.
- [S5] S. Miao, S. M. Brombosz, P. v. R. Schleyer, J. I. Wu, S. Barlow, S. R. Marder, K. I. Hardcastle, U. H. F. Bunz, *J. Am. Chem. Soc.* **2008**, *130*, 7339-7344.
- [S6] A. L. Appleton, S. M. Brombosz, S. Barlow, J. S. Sears, J.-L. Bredas, S. R. Marder, U. H. F. Bunz, *Nat. Commun.* **2010**, *1*, 91.
- [S7] B. D. Lindner, J. U. Engelhart, O. Tverskoy, A. L. Appleton, F. Rominger, A. Peters, H.-J. Himmel, U. H. F. Bunz, *Angew. Chem. Int. Ed.* **2011**, *50*, 8588-8591; *Angew. Chem.* **2011**, *123*, 8747-8750.
- [S8] C. An, X. Guo, M. Baumgarten, *Cryst. Growth Des.* **2015**, *15*, 5240-5245.
- [S9] D. Xia, X. Guo, L. Chen, M. Baumgarten, A. Keerthi, K. Müllen, *Angew. Chem. Int. Ed.* **2016**, *55*, 941-944; *Angew. Chem.* **2016**, *128*, 953-956.
- [S10] C. M. Cardona, W. Li, A. E. Kaifer, D. Stockdale, G. C. Bazan, *Adv. Mater.* **2011**, *23*, 2367-2371.
- [S11] P. Biegger, S. Stolz, S. N. Intorp, Y. Zhang, J. U. Engelhart, F. Rominger, K. I. Hardcastle, U. Lemmer, X. Qian, M. Hamburger, U. H. F. Bunz, *J. Org. Chem.* **2015**, *80*, 582-589.
- [S12] B. D. Lindner, F. Paulus, A. L. Appleton, M. Schaffroth, J. U. Engelhart, K. M. Schelkle, O. Tverskoy, F. Rominger, M. Hamburger, U. H. F. Bunz, *J. Mater. Chem. C* **2014**, *2*, 9609-9612.
- [S13] S. Miao, A. L. Appleton, N. Berger, S. Barlow, S. R. Marder, K. I. Hardcastle, U. H. F. Bunz, *Chem. Eur. J.* **2009**, *15*, 4990-4993.
